# Supplementary material for: Expression of CD14, IL10, and Tolerogenic Signature in Dendritic Cells Inversely Correlate with Clinical and Immunologic Response to TARP Vaccination in Prostate Cancer Patients
Source: Oxford University Press journal article supplement (doi:10.1158/1078-0432.ccr-16-2199), 2017-01-10
Supplement: 10780432ccr162199-sup-171293_2_supp_3761623_whwkgl.xlsx [file 10780432ccr162199-sup-171293_2_supp_3761623_whwkgl.xlsx]

## Sheet: Module 1
mAdb ID	Clone	Description	UniGene	Gene	Map
6474497	A_24_P90216	leucine-rich repeat containing G protein-coupled receptor 4 (LGR4), mRNA.	Hs.502176	LGR4	11p14-p13
6474519	A_24_P935804	Coiled-coil domain containing 66	Hs.476399	CCDC66	3p14.3
6474550	A_32_P102627	Unknown
6474554	A_32_P58755	Transcribed locus	Hs.353024		22
6474556	A_23_P374322	laccase (multicopper oxidoreductase) domain containing 1 (LACC1), transcript variant 2, mRNA.	Hs.210586	LACC1	13q14.11
6474597	A_23_P47885	leucine-rich repeats and immunoglobulin-like domains 3 (LRIG3), transcript variant 2, mRNA.	Hs.253736	LRIG3	12q14.1
6474612	A_24_P135875	prostaglandin E receptor 4 (subtype EP4) pseudogene 2 (PTGER4P2), non-coding RNA.		PTGER4P2	9q13
6474719	A_24_P518580	Transcribed locus	Hs.519026
6474720	A_23_P43744	CDNA FLJ43320 fis, clone NT2RI2024935	Hs.343864		8
6474726	A_23_P209954	granulysin (GNLY), transcript variant 519, mRNA.	Hs.105806	GNLY	2p11.2
6474737	A_24_P299565	Transcribed locus	Hs.664292
6474750	A_23_P394259	membrane protein, palmitoylated 2 (MAGUK p55 subfamily member 2) (MPP2), mRNA.	Hs.514208	MPP2	17q12-q21
6474807	A_24_P224684	sulfotransferase family, cytosolic, 2A, dehydroepiandrosterone (DHEA)-preferring, member 1 (SULT2A1), mRNA.	Hs.515835	SULT2A1	19q13.3
6474809	A_23_P205659	kelch-like 28 (Drosophila)		KLHL28
6474811	A_32_P58668	Transcribed locus	Hs.587470
6474885	A_32_P198223	Unknown
6474980	A_24_P237601	ribosomal protein S6 kinase, 90kDa, polypeptide 5 (RPS6KA5), transcript variant 1, mRNA.	Hs.510225	RPS6KA5	14q31-q32.1
6475007	A_23_P425304	suppressor of fused homolog (Drosophila) (SUFU), transcript variant 1, mRNA.	Hs.404089	SUFU	10q24.32
6475023	A_32_P197333	Transcribed locus	Hs.697110
6475105	A_24_P46927	ST3 beta-galactoside alpha-2,3-sialyltransferase 1	Hs.374257	ST3GAL1	8q24.22
6475132	A_24_P149893	suppressor of fused homolog (Drosophila) (SUFU), transcript variant 1, mRNA.	Hs.404089	SUFU	10q24.32
6475221	A_23_P54720	chromosome 4 open reading frame 46 (C4orf46), mRNA.	Hs.380920	C4orf46	4q32.1
6475291	A_24_P710090	Transcribed locus	Hs.657248
6475384	A_24_P935535	Homo sapiens, clone IMAGE:2960704, mRNA	Hs.664915
6475415	A_32_P104407	CD46 molecule, complement regulatory protein	Hs.510402	CD46	1q32
6475421	A_24_P191013	cytochrome P450, family 4, subfamily A, polypeptide 11 (CYP4A11), mRNA.	Hs.1645	CYP4A11	1p33
6475477	A_24_P467868	Transcribed locus	Hs.573407
6475510	A_23_P40956	ghrelin/obestatin prepropeptide (GHRL), transcript variant 4, mRNA.	Hs.590080	GHRL	3p26-p25
6475520	A_23_P417891	Rho guanine nucleotide exchange factor (GEF) 7 (ARHGEF7), transcript variant 3, mRNA.	Hs.508738	ARHGEF7	13q34
6475654	A_24_P919640	CD44 molecule (Indian blood group)	Hs.502328	CD44	11p13
6475702	A_32_P221569	Proteasome (prosome, macropain) subunit, alpha type, 4	Hs.251531	PSMA4	15q25.1
6475749	A_23_P145824	protein phosphatase 1, regulatory subunit 9A (PPP1R9A), transcript variant 1, mRNA.	Hs.21816	PPP1R9A	7q21.3
6475752	A_32_P105694	Unknown
6475770	A_23_P142335	pregnancy specific beta-1-glycoprotein 2 (PSG2), mRNA.	Hs.709200	PSG2	19q13.1-q13.2
6475783	A_23_P164112	pleckstrin homology domain containing, family M (with RUN domain) member 1 (PLEKHM1), transcript variant 1, mRNA.	Hs.514242	PLEKHM1	17q21.31
6475839	A_23_P434289	G protein-coupled receptor 62 (GPR62), mRNA.	Hs.232213	GPR62	3p21.1
6476016	A_24_P924217	Centlein, centrosomal protein	Hs.435381	CNTLN	9p22.2
6476069	A_24_P651736	Transcribed locus	Hs.734889
6476156	A_23_P99452	breast cancer 2, early onset (BRCA2), mRNA.	Hs.34012	BRCA2	13q12.3
6476195	A_23_P333852	tubulin tyrosine ligase-like family, member 11 (TTLL11), transcript variant 2, mRNA.	Hs.640663	TTLL11	9q33.2
6476207	A_24_P132383	GTPase, IMAP family member 8 (GIMAP8), mRNA.	Hs.647121	GIMAP8	7q36.1
6476254	A_24_P919920	ARV1 homolog (S. cerevisiae)	Hs.275736	ARV1	1q42.2
6476287	A_23_P25945	aarF domain containing kinase 1 (ADCK1), transcript variant 2, mRNA.	Hs.413208	ADCK1	14q24.3
6476295	A_24_P926211	YEATS domain containing 2		YEATS2
6476328	A_32_P181564	Unknown
6476382	A_24_P238365	zinc finger and BTB domain containing 34 (ZBTB34), mRNA.	Hs.177633	ZBTB34	9q33.3
6476536	A_32_P27011	BF909544 IL2-UT0073-181000-184-H02 UT0073 Homo sapiens cDNA, mRNA sequence [BF909544]
6476704	A_32_P185530	Rap guanine nucleotide exchange factor (GEF) 5	Hs.174768	RAPGEF5	7p15.3
6476732	A_32_P347617	apolipoprotein B mRNA editing enzyme, catalytic polypeptide-like 3H (APOBEC3H), transcript variant 2, mRNA.	Hs.440515	APOBEC3H	22q13.1
6476804	A_32_P10327	Zinc finger and BTB domain containing 10	Hs.591868	ZBTB10	8q13-q21.1
6476816	A_32_P31256	KIAA1731 (KIAA1731), mRNA.	Hs.458418	KIAA1731	11q21
6476897	A_24_P923962	Transcribed locus	Hs.715156
6476910	A_24_P335025	ectonucleoside triphosphate diphosphohydrolase 1 (ENTPD1), transcript variant 6, mRNA.	Hs.740368	ENTPD1	10q24
6476914	A_32_P113317	Transcribed locus	Hs.671166
6476924	A_24_P238649	Notch 2 N-terminal like	Hs.728902	NOTCH2NL	1q21.2
6477017	A_24_P928068	TAF15 RNA polymerase II, TATA box binding protein (TBP)-associated factor, 68kDa	Hs.402752	TAF15	17q11.1-q11.2
6477057	A_23_P334083	tripartite motif containing 14 (TRIM14), transcript variant 1, mRNA.	Hs.575631	TRIM14	9q22.33
6477129	A_24_P8575	OTU domain containing 3 (OTUD3), mRNA.	Hs.374987	OTUD3	1p36.13
6477191	A_24_P90637	suppressor of cytokine signaling 4 (SOCS4), transcript variant 1, mRNA.	Hs.532610	SOCS4	14q22.1
6477225	A_23_P354270	guanine nucleotide binding protein (G protein) alpha 12 (GNA12), mRNA.	Hs.487341	GNA12	7p22.2
6477226	A_32_P190303	LON peptidase N-terminal domain and ring finger 2 (LONRF2), mRNA.	Hs.21380	LONRF2	2q11.2
6477277	A_23_P211762	collagen, type VIII, alpha 1 (COL8A1), transcript variant 2, mRNA.	Hs.654548	COL8A1	3q12.3
6477347	A_24_P115990	anti-Mullerian hormone receptor, type II (AMHR2), transcript variant 1, mRNA.	Hs.659889	AMHR2	12q13
6477460	A_23_P115021	actinin, alpha 2 (ACTN2), mRNA.	Hs.498178	ACTN2	1q42-q43
6477520	A_32_P20300	Transcribed locus	Hs.657112
6477596	A_32_P113380	Unknown
6477597	A_24_P359007	Rho guanine nucleotide exchange factor (GEF) 15	Hs.443109	ARHGEF15	17p13.1
6477625	A_24_P92624	Transcribed locus, strongly similar to NP_001155839.1 uncharacterized protein LOC100128542 [Homo sapiens]	Hs.736570
6477641	A_24_P937744	AI355433 qt77g02.x1 NCI_CGAP_Eso2 Homo sapiens cDNA clone IMAGE:1961330 3' similar to contains Alu repetitive element;contains element LTR10 repetitive element ;, mRNA sequence [AI355433]
6477815	A_24_P150160	fatty acid desaturase 2 (FADS2), mRNA.	Hs.502745	FADS2	11q12.2
6477881	A_23_P403195	Microtubule associated monoxygenase, calponin and LIM domain containing 3	Hs.528024	MICAL3	22q11.21
6477886	A_24_P82630	structural maintenance of chromosomes flexible hinge domain containing 1 (SMCHD1), mRNA.	Hs.8118	SMCHD1	18p11.32
6477905	A_23_P134366	ets variant 1 (ETV1), transcript variant 4, mRNA.	Hs.22634	ETV1	7p21.3
6477918	A_23_P422131	kelch domain containing 7A (KLHDC7A), mRNA.	Hs.406913	KLHDC7A	1p36.13
6477942	A_24_P920861	CDNA FLJ25242 fis, clone STM02717	Hs.631231
6477954	A_24_P152845	Unknown
6477994	A_23_P404536	ectonucleotide pyrophosphatase/phosphodiesterase 3 (ENPP3), mRNA.	Hs.486489	ENPP3	6q22
6478079	A_32_P149591	Transcribed locus	Hs.276766		12
6478135	A_23_P256603	myeloid/lymphoid or mixed-lineage leukemia (trithorax homolog, Drosophila); translocated to, 4 (MLLT4), transcript variant 1, mRNA.	Hs.614974	MLLT4	6q27
6478165	A_23_P257250	KIAA0922 (KIAA0922), transcript variant 2, mRNA.	Hs.732450	KIAA0922	4q31.3
6478188	A_32_P233713	Unknown
6478228	A_23_P169257	tumor necrosis factor (ligand) superfamily, member 8 (TNFSF8), transcript variant 1, mRNA.	Hs.494901	TNFSF8	9q33
6478240	A_32_P731227	Unknown
6478242	A_23_P64070	solute carrier family 25, member 45 (SLC25A45), transcript variant 2, mRNA.	Hs.661604	SLC25A45	11q13.1
6478254	A_24_P134850	pleckstrin homology domain containing, family H (with MyTH4 domain) member 1 (PLEKHH1), mRNA.	Hs.594236	PLEKHH1	14q24.1
6478321	A_23_P416711	ST6 (alpha-N-acetyl-neuraminyl-2,3-beta-galactosyl-1, 3)-N-acetylgalactosaminide alpha-2,6-sialyltransferase 3 (ST6GALNAC3), transcript variant 1, mRNA.	Hs.337040	ST6GALNAC3	1p31.1
6478347	A_23_P63371	T-cell acute lymphocytic leukemia 1 (TAL1), mRNA.	Hs.705618	TAL1	1p32
6478349	A_23_P43810	latent transforming growth factor beta binding protein 1 (LTBP1), transcript variant 1, mRNA.	Hs.619315	LTBP1	2p22-p21
6478393	A_24_P647965	Unknown
6478419	A_24_P84834	diacylglycerol kinase, alpha 80kDa (DGKA), transcript variant 1, mRNA.	Hs.524488	DGKA	12q13.3
6478484	A_32_P34003	Transcribed locus	Hs.118769		2
6478501	A_23_P33364	SH3 domain containing 19 (SH3D19), transcript variant 4, mRNA.	Hs.567725	SH3D19	4q31.3
6478527	A_24_P932579	metal-regulatory transcription factor 1 (MTF1), mRNA.	Hs.471991	MTF1	1p33
6478615	A_23_P91859	tetratricopeptide repeat and ankyrin repeat containing 1 (TRANK1), mRNA.	Hs.170999	TRANK1	3p22.2
6478649	A_23_P253911	cholinergic receptor, nicotinic, alpha 3 (neuronal) (CHRNA3), transcript variant 1, mRNA.	Hs.89605	CHRNA3	15q24
6478655	A_23_P380954	zinc finger protein 407 (ZNF407), transcript variant 2, mRNA.	Hs.536490	ZNF407	18q23
6478675	A_24_P229350	formin-like 3 (FMNL3), transcript variant 1, mRNA.	Hs.179838	FMNL3	12q13.12
6478711	A_24_P459937	Transcribed locus	Hs.628261
6478752	A_32_P30421	Family with sequence similarity 49, member B	Hs.126941	FAM49B	8q24.21
6478887	A_24_P128442	T-box 15 (TBX15), mRNA.	Hs.146196	TBX15	1p11.1
6478898	A_23_P166438	apolipoprotein L, 5 (APOL5), mRNA.	Hs.326561	APOL5	22q12.3
6478914	A_23_P62099	melanoma antigen family C, 2 (MAGEC2), mRNA.	Hs.123536	MAGEC2	Xq27
6478951	A_24_P205423	Leucine rich repeat (in FLII) interacting protein 1	Hs.471779	LRRFIP1	2q37.3
6478969	A_23_P216806	amyloid beta (A4) precursor protein-binding, family A, member 1 (APBA1), mRNA.	Hs.171939	APBA1	9q13-q21.1
6479025	A_24_P220771	ankyrin repeat domain 17 (ANKRD17), transcript variant 1, mRNA.	Hs.644997	ANKRD17	4q13.3
6479083	A_23_P300563	Unknown
6479104	A_24_P105747	adaptor-related protein complex 1, sigma 3 subunit (AP1S3), mRNA.	Hs.632555	AP1S3	2q36.1
6479236	A_24_P51061	discoidin, CUB and LCCL domain containing 2 (DCBLD2), mRNA.	Hs.203691	DCBLD2	3q12.1
6479285	A_23_P95930	high mobility group AT-hook 2 (HMGA2), transcript variant 1, mRNA.	Hs.505924	HMGA2	12q15
6479460	A_32_P213349	Transcribed locus, strongly similar to XP_003641686.1 PREDICTED: T-box brain protein 1-like [Gallus gallus]	Hs.666764
6479484	A_23_P407583	paternally expressed 3 (PEG3), transcript variant 5, mRNA.	Hs.731875	PEG3	19q13.4
6479494	A_23_P500400	ATP-binding cassette, sub-family A (ABC1), member 6 (ABCA6), mRNA.	Hs.709514	ABCA6	17q24.3
6479504	A_24_P465879	CDNA: FLJ22813 fis, clone KAIA2964	Hs.677381
6479509	A_23_P106042	CKLF-like MARVEL transmembrane domain containing 5 (CMTM5), transcript variant 1, mRNA.	Hs.99272	CMTM5	14q11.2
6479579	A_32_P214665	Purkinje cell protein 4 like 1 (PCP4L1), mRNA.	Hs.433150	PCP4L1	1q23.3
6479592	A_24_P85169	BTB (POZ) domain containing 9 (BTBD9), transcript variant 4, mRNA.	Hs.603858	BTBD9	6p21
6479614	A_24_P40626	gremlin 2 (GREM2), mRNA.	Hs.98206	GREM2	1q43
6479639	A_23_P87982	ATPase, H+/K+ transporting, nongastric, alpha polypeptide (ATP12A), transcript variant 2, mRNA.	Hs.147111	ATP12A	13q12.12
6479661	A_32_P162639	Transcribed locus	Hs.586380
6479696	A_24_P360499	Transcribed locus	Hs.639318
6479697	A_23_P90790	methionyl aminopeptidase type 1D (mitochondrial) (METAP1D), nuclear gene encoding mitochondrial protein, mRNA.	Hs.298250	METAP1D	2q31.1
6479708	A_32_P57213	CDNA FLJ43515 fis, clone PERIC2006121	Hs.188491		9
6479786	A_23_P69863	protocadherin beta 5 (PCDHB5), mRNA.	Hs.119693	PCDHB5	5q31
6479916	A_24_P139152	MRNA full length insert cDNA clone EUROIMAGE 1913076	Hs.740613		3
6480023	A_23_P6596	hairy and enhancer of split 1, (Drosophila) (HES1), mRNA.	Hs.250666	HES1	3q28-q29
6480057	A_24_P887695	Unknown
6480109	A_24_P298495	uncharacterized LOC100130744 (LOC100130744), non-coding RNA.		LOC100130744	5p15.2
6480143	A_23_P208240	Zinc finger protein 160	Hs.655967	ZNF160	19q13.42
6480148	A_24_P84924	Unknown
6480216	A_24_P346517	leucine-rich repeats and guanylate kinase domain containing (LRGUK), mRNA.	Hs.149774	LRGUK	7q33
6480224	A_23_P423348	interleukin 31 receptor A (IL31RA), transcript variant 4, mRNA.	Hs.55378	IL31RA	5q11.2
6480253	A_24_P915300	synapse defective 1, Rho GTPase, homolog 2 (C. elegans) (SYDE2), mRNA.	Hs.670497	SYDE2	1p22.3
6480363	A_23_P65388	C-type lectin domain family 14, member A (CLEC14A), mRNA.	Hs.525307	CLEC14A	14q21.1
6480426	A_23_P33847	synapsin I (SYN1), transcript variant Ib, mRNA.	Hs.225936	SYN1	Xp11.23
6480557	A_24_P227230	cell adhesion molecule 1 (CADM1), transcript variant 1, mRNA.	Hs.370510	CADM1	11q23.2
6480710	A_23_P301855	limbic system-associated membrane protein (LSAMP), mRNA.	Hs.26409	LSAMP	3q13.2-q21
6480738	A_23_P161218	ankyrin repeat domain 1 (cardiac muscle) (ANKRD1), mRNA.	Hs.448589	ANKRD1	10q23.31
6480771	A_32_P109029	G protein-coupled receptor, family C, group 5, member C (GPRC5C), transcript variant 2, mRNA.	Hs.446438	GPRC5C	17q25
6480940	A_23_P349203	ribonuclease/angiogenin inhibitor 1		RNH1
6480959	A_24_P576650	Albumin	Hs.418167	ALB	4q13.3
6480997	A_23_P153986	potassium inwardly-rectifying channel, subfamily J, member 3 (KCNJ3), transcript variant 1, mRNA.	Hs.591606	KCNJ3	2q24.1
6481053	A_23_P77245	similar to vomeronasal 1 receptor, c19		LOC646257
6481074	A_24_P913930	Transcribed locus	Hs.627877
6481122	A_24_P38363	v-myc myelocytomatosis viral oncogene homolog (avian) (MYC), mRNA.	Hs.202453	MYC	8q24.21
6481214	A_24_P812155	Unknown
6481240	A_24_P340036	ring finger protein 128, E3 ubiquitin protein ligase (RNF128), transcript variant 2, mRNA.	Hs.496542	RNF128	Xq22.3
6481254	A_24_P208998	tripartite motif containing 23 (TRIM23), transcript variant gamma, mRNA.	Hs.792	TRIM23	5q12.3
6481326	A_24_P923061	Ras suppressor protein 1		RSU1
6481343	A_23_P84272	Unknown
6481362	A_23_P138938	progesterone receptor (PGR), transcript variant 2, mRNA.	Hs.32405	PGR	11q22-q23
6481368	A_32_P224840	AKT interacting protein (AKTIP), transcript variant 2, mRNA.	Hs.380897	AKTIP	16q12.2
6481522	A_23_P70161	integrin, alpha 2 (CD49B, alpha 2 subunit of VLA-2 receptor) (ITGA2), mRNA.	Hs.482077	ITGA2	5q11.2
6481575	A_24_P299507	RE1-silencing transcription factor	Hs.307836	REST	4q12
6481582	A_23_P35219	NIMA (never in mitosis gene a)-related kinase 2 (NEK2), transcript variant 1, mRNA.	Hs.153704	NEK2	1q32.2-q41
6481643	A_24_P724984	Heterogeneous nuclear ribonucleoprotein R	Hs.373763	HNRNPR	1p36.12
6481648	A_23_P399265	stathmin-like 2		STMN2
6481680	A_24_P229055	sema domain, immunoglobulin domain (Ig), transmembrane domain (TM) and short cytoplasmic domain, (semaphorin) 4D (SEMA4D), transcript variant 2, mRNA.	Hs.494406	SEMA4D	9q22.2
6481708	A_23_P212042	antigen p97 (melanoma associated) identified by monoclonal antibodies 133.2 and 96.5 (MFI2), transcript variant 1, mRNA.	Hs.184727	MFI2	3q28-q29
6481787	A_24_P912765	CDNA FLJ39799 fis, clone SPLEN2006785	Hs.683825
6481854	A_32_P208173	B40201 artifact-warning sequence (translated ALU class B) - human {Homo sapiens;} , partial (23%) [THC2285364]
6481888	A_32_P56320	Z43965 HSC1PE111 normalized infant brain cDNA Homo sapiens cDNA clone c-1pe11, mRNA sequence [Z43965]
6481933	A_23_P369343	kallikrein-related peptidase 8 (KLK8), transcript variant 2, mRNA.	Hs.104570	KLK8	19q13
6481946	A_24_P193911	microtubule-associated protein, RP/EB family, member 2 (MAPRE2), transcript variant 1, mRNA.	Hs.532824	MAPRE2	18q12.1
6481987	A_24_P58247	olfactory receptor, family 1, subfamily F, member 2 (OR1F2P), non-coding RNA.		OR1F2P	16p13.3
6482014	A_24_P927553	Transcribed locus	Hs.733255
6482026	A_24_P784846	CDNA FLJ11844 fis, clone HEMBA1006665	Hs.658795
6482043	A_24_P185945	melanoma antigen family A, 4 (MAGEA4), transcript variant 4, mRNA.	Hs.37107	MAGEA4	Xq28
6482089	A_23_P402892	NLR family, CARD domain containing 5 (NLRC5), mRNA.	Hs.528836	NLRC5	16q13
6482195	A_23_P95441	kinesin family member 13B (KIF13B), mRNA.	Hs.444767	KIF13B	8p12
6482228	A_32_P144815	Tyrosine 3-monooxygenase/tryptophan 5-monooxygenase activation protein, theta polypeptide	Hs.74405	YWHAQ	2p25.1
6482317	A_32_P203728	Transcribed locus	Hs.124554		3
6482357	A_24_P376322	methyl-CpG binding domain protein 1 (MBD1), transcript variant 4, mRNA.	Hs.405610	MBD1	18q21
6482525	A_32_P44961	La ribonucleoprotein domain family, member 1B	Hs.657067	LARP1B	4q28.2
6482592	A_32_P155802	1-acylglycerol-3-phosphate O-acyltransferase 1 (lysophosphatidic acid acyltransferase, alpha)	Hs.409230	AGPAT1	6p21.3
6482636	A_32_P144390	Transcribed locus	Hs.432345		1
6482642	A_32_P179859	Uncharacterized LOC728705	Hs.129828	LOC728705	12q23.3
6482733	A_24_P885303	Transcribed locus	Hs.687287
6482736	A_32_P44385	Pentatricopeptide repeat domain 3	Hs.323489	PTCD3	2p11.2
6482779	A_24_P234838	protocadherin 1 (PCDH1), transcript variant 2, mRNA.	Hs.79769	PCDH1	5q31.3
6482827	A_24_P565898	Unknown
6482960	A_23_P393777	prostaglandin D2 receptor (DP) (PTGDR), mRNA.	Hs.306831	PTGDR	14q22.1
6483046	A_32_P23872	Unknown
6483307	A_23_P413693	long intergenic non-protein coding RNA 479 (LINC00479), non-coding RNA.		LINC00479	21q22.3
6483355	A_23_P117833	Myotubularin related protein 10	Hs.30141	MTMR10	15q13.3
6483469	A_24_P52597	cytochrome P450, family 17, subfamily A, polypeptide 1 (CYP17A1), mRNA.	Hs.438016	CYP17A1	10q24.3
6483487	A_32_P196193	progestin and adipoQ receptor family member IX (PAQR9), mRNA.	Hs.656111	PAQR9	3q23
6483542	A_24_P13595	ataxin 3 (ATXN3), transcript variant y, mRNA.	Hs.532632	ATXN3	14q21
6483609	A_24_P72420	engulfment and cell motility 1 (ELMO1), transcript variant 5, mRNA.	Hs.434989	ELMO1	7p14.1
6483792	A_32_P138409	Unknown
6483874	A_32_P27250	Chromosome 11 open reading frame 55	Hs.99443	C11orf55	11p13
6483882	A_23_P171107	cyclin B3 (CCNB3), transcript variant 3, mRNA.	Hs.130310	CCNB3	Xp11
6483912	A_23_P410653	myeloid/lymphoid or mixed-lineage leukemia (trithorax homolog, Drosophila); translocated to, 6 (MLLT6), mRNA.	Hs.91531	MLLT6	17q21
6483931	A_24_P7143	myosin IB (MYO1B), transcript variant 3, mRNA.	Hs.439620	MYO1B	2q12-q34
6483976	A_23_P140858	RNA binding protein, fox-1 homolog (C. elegans) 1 (RBFOX1), transcript variant 3, mRNA.	Hs.459842	RBFOX1	16p13.3
6484018	A_23_P216307	runt-related transcription factor 1; translocated to, 1 (cyclin D-related) (RUNX1T1), transcript variant 1, mRNA.	Hs.368431	RUNX1T1	8q22
6484072	A_24_P102125	Actin-like 6A	Hs.435326	ACTL6A	3q26.33
6484133	A_23_P26501	centriolar coiled coil protein 110kDa (CCP110), transcript variant 2, mRNA.	Hs.279912	CCP110	16p12.3
6484259	A_32_P21246	HLA complex group 27 (non-protein coding) (HCG27), non-coding RNA.		HCG27	6p21.33
6484282	A_32_P542318	CDNA: FLJ23065 fis, clone LNG04894	Hs.125352		5
6484524	A_24_P887768	Heat shock 70kDa protein 8	Hs.180414	HSPA8	11q24.1
6484527	A_23_P79247	post-GPI attachment to proteins 1 (PGAP1), mRNA.	Hs.229988	PGAP1	2q33.1
6484566	A_23_P134162	doublecortin domain containing 2 (DCDC2), transcript variant 2, mRNA.	Hs.61345	DCDC2	6p22.1
6484579	A_24_P273875	peroxiredoxin 3		PRDX3
6484587	A_24_P777918	Signal peptidase complex subunit 2 homolog (S. cerevisiae)	Hs.282700	SPCS2	11q13.4
6484711	A_23_P360316	fucosyltransferase 3 (galactoside 3(4)-L-fucosyltransferase, Lewis blood group) (FUT3), transcript variant 4, mRNA.	Hs.169238	FUT3	19p13.3
6484764	A_24_P795371	Homo sapiens cDNA FLJ10010 fis, clone HEMBA1000302. [AK000872]
6484827	A_32_P66934	MRNA; cDNA DKFZp686I19109 (from clone DKFZp686I19109)	Hs.648609		3
6484833	A_24_P196318	solute carrier family 2 (facilitated glucose transporter), member 9 (SLC2A9), transcript variant 1, mRNA.	Hs.656895	SLC2A9	4p16.1
6484899	A_32_P91773	Transcribed locus	Hs.702118		3
6484921	A_24_P82032	ras homolog family member J (RHOJ), mRNA.	Hs.656339	RHOJ	14q23.2
6485052	A_24_P205025	Transcribed locus	Hs.572057
6485115	A_23_P18993	mesoderm induction early response 1, family member 3 (MIER3), mRNA.	Hs.657594	MIER3	5q11.2
6485168	A_23_P131215	crystallin, gamma D (CRYGD), mRNA.	Hs.546247	CRYGD	2q33-q35
6485171	A_23_P352932	sortilin-related VPS10 domain containing receptor 1 (SORCS1), transcript variant 2, mRNA.	Hs.591915	SORCS1	10q23-q25
6485238	A_23_P411851	spectrin repeat containing, nuclear envelope family member 3 (SYNE3), mRNA.	Hs.354645	SYNE3	14q32.13
6485277	A_32_P51848	family with sequence similarity 105, member A (FAM105A), mRNA.	Hs.155085	FAM105A	5p15.2
6485298	A_32_P70129	Transcribed locus	Hs.664155
6485332	A_24_P110887	KIAA2018 (KIAA2018), mRNA.	Hs.632570	KIAA2018	3q13.2
6485381	A_24_P941309	Transcribed locus	Hs.737629
6485434	A_23_P304054	Chromosome 18 open reading frame 49	Hs.733355	C18orf49	18q21.33
6485481	A_23_P35617	phospholipase C, epsilon 1 (PLCE1), transcript variant 2, mRNA.	Hs.655033	PLCE1	10q23
6485720	A_32_P209206	Pleckstrin homology domain containing, family A (phosphoinositide binding specific) member 3	Hs.41086	PLEKHA3	2q31.2
6485741	A_23_P101193	myosin VB (MYO5B), mRNA.	Hs.720076	MYO5B	18q21
6485770	A_23_P300087	vomeronasal 1 receptor 10 pseudogene (VN1R10P), non-coding RNA.		VN1R10P	6p22.1
6485790	A_23_P14295	chromosome 14 open reading frame 162 (C14orf162), non-coding RNA.		C14orf162	14q24.1
6485811	A_24_P481314	Polycomb group ring finger 5	Hs.500512	PCGF5	10q23.32
6485855	A_24_P940086	neurexophilin 3 (NXPH3), mRNA.	Hs.55069	NXPH3	17q21.33
6485860	A_32_P131317	Haptoglobin	Hs.513711	HP	16q22.2
6485891	A_32_P171488	Dual specificity phosphatase 1	Hs.171695	DUSP1	5q34
6485904	A_32_P221517	Transcribed locus	Hs.635267
6485919	A_23_P88767	phospholipase A2, group X (PLA2G10), mRNA.	Hs.567366	PLA2G10	16p13.1-p12
6485957	A_24_P303497	minichromosome maintenance complex component 9 (MCM9), transcript variant 1, mRNA.	Hs.279008	MCM9	6q22.31
6486004	A_32_P224697	hypothetical protein LOC643950		LOC643950
6486017	A_23_P48404	Homo sapiens PRO2435 mRNA, complete cds. [AF119881]
6486068	A_23_P118493	target of myb1 (chicken)-like 1 (TOM1L1), mRNA.	Hs.153504	TOM1L1	17q23.2
6486117	A_23_P67072	zinc finger protein 615 (ZNF615), transcript variant 2, mRNA.	Hs.368355	ZNF615	19q13.41
6486197	A_23_P41789	solute carrier family 27 (fatty acid transporter), member 6 (SLC27A6), transcript variant 2, mRNA.	Hs.49765	SLC27A6	5q23.3
6486298	A_24_P290623	similar to CG32542-PA		LOC196752
6486299	A_23_P352619	TRAF-interacting protein with forkhead-associated domain (TIFA), mRNA.	Hs.310640	TIFA	4q25
6486360	A_24_P37300	Clone 23688 mRNA sequence	Hs.370287		2
6486537	A_24_P918527	Transcription factor 4	Hs.605153	TCF4	18q21.1
6486646	A_24_P356509	RAD51 homolog D (S. cerevisiae) (RAD51D), transcript variant 4, mRNA.	Hs.631757	RAD51D	17q11
6486687	A_23_P422732	WD repeat domain 63 (WDR63), mRNA.	Hs.97933	WDR63	1p22.3
6486688	A_32_P84526	Heterogeneous nuclear ribonucleoprotein C (C1/C2)	Hs.508848	HNRNPC	14q11.2
6486731	A_24_P942945	G protein-coupled receptor 126 (GPR126), transcript variant b1, mRNA.	Hs.318894	GPR126	6q24.1
6486741	A_23_P159721	G protein-coupled receptor 50 (GPR50), mRNA.	Hs.567390	GPR50	Xq28
6486746	A_32_P134109	Full length insert cDNA clone ZD68B12	Hs.264606		8
6486800	A_24_P753849	Transcribed locus	Hs.720365
6486921	A_24_P718672	CDNA FLJ14111 fis, clone MAMMA1001630	Hs.660136		1
6486929	A_24_P132813	oligodendrocytic myelin paranodal and inner loop protein (OPALIN), transcript variant 2, mRNA.	Hs.12449	OPALIN	10q23-q24
6486945	A_23_P50374	osteoclast associated, immunoglobulin-like receptor (OSCAR), transcript variant 5, mRNA.	Hs.347655	OSCAR	19q13.42
6486985	A_32_P212294	Transcribed locus	Hs.636739
6486994	A_32_P102745	Folate receptor 2 (fetal)	Hs.433159	FOLR2	11q13.3-q13.5
6487027	A_23_P502750	Mdm2, p53 E3 ubiquitin protein ligase homolog (mouse) (MDM2), mRNA.		MDM2	12q14.3-q15
6487074	A_32_P327810	Nucleoporin 50kDa	Hs.731619	NUP50	22q13.31
6487077	A_23_P55099	protein kinase C, alpha (PRKCA), mRNA.	Hs.531704	PRKCA	17q22-q23.2
6487101	A_32_P94818	Transcribed locus	Hs.635629
6487133	A_24_P238499	chromosome 18 open reading frame 56 (C18orf56), mRNA.	Hs.274959	C18orf56	18p11.32
6487154	A_24_P525749	long intergenic non-protein coding RNA 617 (LINC00617), non-coding RNA.		LINC00617	14
6487196	A_24_P917549	Ribosomal protein S27-like	Hs.108957	RPS27L	15q22.2
6487198	A_32_P128588	Signal sequence receptor, alpha	Hs.114033	SSR1	6p24.3
6487211	A_23_P336693	claudin 18 (CLDN18), transcript variant 2, mRNA.	Hs.655324	CLDN18	3q22.3
6487262	A_24_P944677	ATPase, H+ transporting, lysosomal 42kDa, V1 subunit C1	Hs.86905	ATP6V1C1	8q22.3
6487309	A_32_P142664	Nuclear pore complex interacting protein-like 3	Hs.611072	NPIPL3	16p12.2
6487322	A_24_P120147	SH2 domain containing 6	Hs.209542	SH2D6	2p11.2
6487344	A_24_P933059	Unknown
6487426	A_23_P53226	Cbl proto-oncogene, E3 ubiquitin protein ligase (CBL), mRNA.	Hs.504096	CBL	11q23.3
6487554	A_23_P350895	RAB GTPase activating protein 1	Hs.271341	RABGAP1	9q34.11
6487603	A_24_P924589	Unknown
6487663	A_24_P917344	CDNA: FLJ23171 fis, clone LNG09994	Hs.612921
6487682	A_23_P302018	TXK tyrosine kinase (TXK), mRNA.	Hs.479669	TXK	4p12
6487732	A_24_P828496	uncharacterized LOC100505633 (LOC100505633), non-coding RNA.		LOC100505633	1q21-q23
6487751	A_23_P204640	Nanog homeobox (NANOG), mRNA.	Hs.635882	NANOG	12p13.31
6487769	A_23_P383915	BTB (POZ) domain containing 16 (BTBD16), mRNA.	Hs.422466	BTBD16	10q26.13
6487784	A_24_P564761	Transcribed locus	Hs.549694
6487792	A_24_P494600	ALU1_HUMAN (P39188) Alu subfamily J sequence contamination warning entry, partial (5%) [THC2376215]
6487798	A_23_P67960	glucose-6-phosphatase, catalytic, 2 (G6PC2), transcript variant 2, mRNA.	Hs.283963	G6PC2	2q24.3
6487822	A_23_P206359	cadherin 1, type 1, E-cadherin (epithelial) (CDH1), mRNA.	Hs.461086	CDH1	16q22.1
6487912	A_24_P16378	heparan-alpha-glucosaminide N-acetyltransferase (HGSNAT), mRNA.	Hs.600384	HGSNAT	8p11.1
6487963	A_24_P67948	Homo sapiens cDNA FLJ10254 fis, clone HEMBB1000848. [AK001116]
6487968	A_32_P148075	CDNA FLJ35030 fis, clone OCBBF2015931	Hs.374761		5
6488047	A_24_P930391	CDNA FLJ12289 fis, clone MAMMA1001788	Hs.687769		13
6488167	A_23_P73170	N-deacetylase/N-sulfotransferase (heparan glucosaminyl) 3 (NDST3), mRNA.	Hs.480596	NDST3	4q26
6488215	A_32_P16007	POTE ankyrin domain family, member B (POTEB), mRNA.	Hs.442712	POTEB	15q11.2
6488257	A_24_P567502	NADH dehydrogenase (ubiquinone) 1 beta subcomplex, 2, 8kDa	Hs.655788	NDUFB2	7q34
6488349	A_24_P453901	Q86TS6 (Q86TS6) Full-length cDNA 5-PRIME end of clone CS0CAP004YO05 of Thymus of Homo sapiens (human) (Fragment), partial (14%) [THC2409757]
6488417	A_23_P58819	RAN binding protein 17 (RANBP17), mRNA.	Hs.410810	RANBP17	5q34
6488437	A_23_P416732	t-complex-associated-testis-expressed 3 (TCTE3), mRNA.	Hs.733746	TCTE3	6q27
6488454	A_24_P585428	ASMTL antisense RNA 1 (non-protein coding)	Hs.521856	ASMTL-AS1	Xp22.33
6488487	A_24_P337143	COX17 cytochrome c oxidase assembly homolog (S. cerevisiae)	Hs.534383	COX17	3q13.33
6488510	A_24_P797366	Transcribed locus	Hs.661111
6488528	A_32_P165047	Myelin expression factor 2	Hs.6638	MYEF2	15q21.1
6488551	A_24_P936671	Chaperonin containing TCP1, subunit 8 (theta)	Hs.125113	CCT8	21q22.11
6488665	A_24_P32881	DnaJ (Hsp40) homolog, subfamily B, member 13	Hs.567888	DNAJB13	11q13.4
6488712	A_24_P42773	Homo sapiens PRO2492 mRNA, complete cds. [AF119882]
6488807	A_23_P19663	connective tissue growth factor (CTGF), mRNA.	Hs.410037	CTGF	6q23.1
6488883	A_23_P332413	schlafen family member 13 (SLFN13), mRNA.	Hs.462833	SLFN13	17q12
6488917	A_24_P37589	acid phosphatase, prostate (ACPP), transcript variant 1, mRNA.	Hs.433060	ACPP	3q22.1
6488945	A_23_P252892	dopamine receptor D5 (DRD5), mRNA.	Hs.380681	DRD5	4p16.1
6488984	A_24_P935585	Transcribed locus	Hs.711789
6488989	A_23_P415532	Homo sapiens cDNA FLJ30317 fis, clone BRACE2003594. [AK054879]
6488999	A_23_P421526	outer dense fiber of sperm tails 4 (ODF4), mRNA.	Hs.186045	ODF4	17p13.1
6489162	A_23_P121795	sorbin and SH3 domain containing 2 (SORBS2), transcript variant 3, mRNA.	Hs.655143	SORBS2	4q35.1
6489189	A_23_P94255	transient receptor potential cation channel, subfamily A, member 1 (TRPA1), mRNA.	Hs.716816	TRPA1	8q13
6489215	A_32_P87531	dynein, axonemal, heavy chain 14 (DNAH14), transcript variant 1, mRNA.	Hs.133977	DNAH14	1q42.12
6489218	A_32_P71888	Transcribed locus	Hs.99253		9
6489269	A_23_P70307	SPARC related modular calcium binding 2 (SMOC2), transcript variant 2, mRNA.	Hs.487200	SMOC2	6q27
6489321	A_23_P140009	solute carrier family 10 (sodium/bile acid cotransporter family), member 2 (SLC10A2), mRNA.	Hs.194783	SLC10A2	13q33
6489366	A_24_P276873	ermin, ERM-like protein (ERMN), transcript variant 2, mRNA.	Hs.443894	ERMN	2q24.1
6489406	A_32_P233213	C40201 artifact-warning sequence (translated ALU class C) - human {Homo sapiens;} , partial (8%) [THC2446322]
6489409	A_24_P99526	tweety homolog 2 (Drosophila) (TTYH2), transcript variant 2, mRNA.	Hs.27935	TTYH2	17q25.1
6489705	A_23_P205074	solute carrier family 46, member 3 (SLC46A3), transcript variant 1, mRNA.	Hs.117167	SLC46A3	13q12.3
6489745	A_24_P901856	Double homeobox A pseudogene 10	Hs.729591	DUXAP10	14q11.2
6489861	A_24_P933565	post-GPI attachment to proteins 1 (PGAP1), mRNA.	Hs.229988	PGAP1	2q33.1
6489904	A_24_P731255	CDNA: FLJ22144 fis, clone HEP21732	Hs.662004
6490019	A_32_P82610	Transcribed locus	Hs.545420
6490154	A_23_P217187	Unknown
6490218	A_24_P634688	Transcribed locus	Hs.340072		1
6490240	A_24_P100130	BCL2-like 1 (BCL2L1), nuclear gene encoding mitochondrial protein, transcript variant 2, mRNA.	Hs.516966	BCL2L1	20q11.21
6490293	A_23_P57474	oxysterol binding protein 2 (OSBP2), transcript variant 1, mRNA.	Hs.517546	OSBP2	22q12.2
6490314	A_24_P477516	Unknown
6490344	A_23_P58557	laeverin (AQPEP), mRNA.	Hs.98288	AQPEP	5q23.1
6490363	A_23_P154526	growth factor receptor-bound protein 14 (GRB14), mRNA.	Hs.411881	GRB14	2q22-q24
6490431	A_24_P346855	antigen identified by monoclonal antibody Ki-67 (MKI67), transcript variant 2, mRNA.	Hs.80976	MKI67	10q26.2
6490459	A_23_P428729	Zinc finger, MYM-type 6	Hs.729053	ZMYM6	1p34.2
6490506	A_32_P138666	T-cell lymphoma invasion and metastasis 1	Hs.517228	TIAM1	21q22.1|21q22.11
6490643	A_23_P334635	jerky homolog (mouse) (JRK), transcript variant 1, mRNA.	Hs.535903	JRK	8q24.3
6490701	A_24_P316414	Uncharacterized LOC100289058	Hs.348525	LOC100289058	13q14.11
6490712	A_24_P264166	golgin A8 family, member F (GOLGA8F), non-coding RNA.		GOLGA8F	15q13.1
6490717	A_23_P18479	centrosomal protein 135kDa		CEP135
6490752	A_23_P163251	progestin and adipoQ receptor family member V (PAQR5), transcript variant 2, mRNA.	Hs.591096	PAQR5	15q23
6490817	A_24_P161809	Unknown
6490845	A_24_P921660	RNA binding motif protein 47	Hs.518727	RBM47	4p14
6490901	A_24_P995	DDB1 and CUL4 associated factor 13		DCAF13
6490925	A_24_P106910	patched 1 (PTCH1), transcript variant 1a', mRNA.	Hs.494538	PTCH1	9q22.3
6490952	A_24_P42768	RNA binding motif protein 26	Hs.558528	RBM26	13q31.1
6490983	A_23_P69206	solute carrier family 6 (neurotransmitter transporter, taurine), member 6 (SLC6A6), transcript variant 2, mRNA.	Hs.529488	SLC6A6	3p25.1
6490986	A_24_P748377	MAGI2 antisense RNA 3 (non-protein coding) (MAGI2-AS3), transcript variant 1, non-coding RNA.		MAGI2-AS3	7
6491042	A_23_P332820	interleukin 17A (IL17A), mRNA.	Hs.41724	IL17A	6p12
6491111	A_23_P203972	frizzled family receptor 10 (FZD10), mRNA.	Hs.733275	FZD10	12q24.33
6491146	A_32_P226620	Transcribed locus	Hs.553069
6491153	A_23_P157521	Fucosyltransferase 10 (alpha (1,3) fucosyltransferase)	Hs.458713	FUT10	8p12
6491160	A_23_P202683	cadherin-related family member 5 (CDHR5), transcript variant 3, mRNA.	Hs.165619	CDHR5	11p15.5
6491194	A_32_P158536	Unknown
6491218	A_23_P435601	ST8 alpha-N-acetyl-neuraminide alpha-2,8-sialyltransferase 4 (ST8SIA4), transcript variant 2, mRNA.	Hs.308628	ST8SIA4	5q21
6491265	A_24_P895028	KIAA0226	Hs.478868	KIAA0226	3q29
6491317	A_23_P91829	discoidin, CUB and LCCL domain containing 2 (DCBLD2), mRNA.	Hs.203691	DCBLD2	3q12.1
6491343	A_23_P127891	brain-derived neurotrophic factor (BDNF), transcript variant 17, mRNA.	Hs.502182	BDNF	11p13
6491389	A_24_P187921	mannosidase, endo-alpha (MANEA), mRNA.	Hs.533323	MANEA	6q16.1
6491451	A_23_P57323	v-ets erythroblastosis virus E26 oncogene homolog (avian) (ERG), transcript variant 1, mRNA.	Hs.473819	ERG	21q22.3
6491489	A_32_P29632	coxsackie virus and adenovirus receptor (CXADR), transcript variant 3, mRNA.	Hs.627078	CXADR	21q21.1
6491553	A_23_P80700	Kelch-like 18 (Drosophila)	Hs.517946	KLHL18	3p21.31
6491597	A_24_P930432	RasGEF domain family, member 1B	Hs.591696	RASGEF1B	4q21.21
6491604	A_32_P142128	BMS1 pseudogene 5 (BMS1P5), non-coding RNA.		BMS1P5	10q11.22
6491644	A_32_P926336	Ubiquitin-like with PHD and ring finger domains 1	Hs.108106	UHRF1	19p13.3
6491723	A_32_P63342	Catenin (cadherin-associated protein), alpha 1, 102kDa	Hs.445981	CTNNA1	5q31.2
6491772	A_32_P200586	CDC-like kinase 1	Hs.433732	CLK1	2q33
6491855	A_24_P300021	short stature homeobox 2 (SHOX2), transcript variant 3, mRNA.	Hs.55967	SHOX2	3q25.32
6491881	A_23_P44794	RAB3C, member RAS oncogene family (RAB3C), mRNA.	Hs.482173	RAB3C	5q13
6491947	A_32_P162192	long intergenic non-protein coding RNA 221 (LINC00221), non-coding RNA.		LINC00221	14
6492012	A_23_P131263	membrane protein, palmitoylated 4 (MAGUK p55 subfamily member 4) (MPP4), mRNA.	Hs.63085	MPP4	2q33.2
6492019	A_23_P206293	G protein-coupled receptor 114 (GPR114), mRNA.	Hs.187884	GPR114	16q21
6492022	A_32_P36385	Transcribed locus	Hs.538600
6492047	A_23_P382094	long intergenic non-protein coding RNA 52 (LINC00052), non-coding RNA.		LINC00052	15q25.3
6492107	A_23_P369994	doublecortin-like kinase 1 (DCLK1), transcript variant 1, mRNA.	Hs.507755	DCLK1	13q13
6492124	A_32_P9491	TTR320199 immunoglobulin mu heavy chain {Tursiops truncatus;} , partial (10%) [THC2386609]
6492161	A_23_P302207	zinc finger protein 853 (ZNF853), mRNA.	Hs.592170	ZNF853	7p22.1
6492176	A_23_P319466	cysteinyl leukotriene receptor 2 (CYSLTR2), mRNA.	Hs.253706	CYSLTR2	13q14.2
6492279	A_23_P11362	PHD finger protein 16 (PHF16), transcript variant 1, mRNA.	Hs.371977	PHF16	Xp11.23
6492313	A_23_P109488	phosphoinositide-3-kinase interacting protein 1 (PIK3IP1), transcript variant 1, mRNA.	Hs.26670	PIK3IP1	22q12.2
6492346	A_24_P168925	chordin-like 1 (CHRDL1), transcript variant 2, mRNA.	Hs.496587	CHRDL1	Xq23
6492381	A_23_P502980	diacylglycerol kinase, eta (DGKH), transcript variant 4, mRNA.	Hs.733239	DGKH	13q14.11
6492402	A_24_P926507	solute carrier family 14 (urea transporter), member 1 (Kidd blood group) (SLC14A1), transcript variant 4, mRNA.	Hs.101307	SLC14A1	18q11-q12
6492433	A_24_P812172	Unknown
6492471	A_23_P362148	delta/notch-like EGF repeat containing (DNER), mRNA.	Hs.234074	DNER	2q36.3
6492703	A_24_P926580	CDNA FLJ10946 fis, clone PLACE1000005	Hs.675467
6492765	A_32_P180199	Nuclear factor of kappa light polypeptide gene enhancer in B-cells 1	Hs.618430	NFKB1	4q24
6492885	A_23_P74852	PREDICTED: hypothetical LOC100505991, transcript variant 2 (LOC100505991), miscRNA.		LOC100505991	1
6492950	A_24_P150931	neurexophilin 3 (NXPH3), mRNA.	Hs.55069	NXPH3	17q21.33
6492951	A_24_P332806	inositol polyphosphate-5-phosphatase, 75kDa (INPP5B), nuclear gene encoding mitochondrial protein, mRNA.	Hs.449942	INPP5B	1p34
6493029	A_23_P162547	myosin, light chain 2, regulatory, cardiac, slow (MYL2), mRNA.	Hs.75535	MYL2	12q24.11
6493102	A_24_P282288	KIAA0317	Hs.730659	KIAA0317	14q24.3
6493116	A_23_P74619	selenium binding protein 1 (SELENBP1), transcript variant 3, mRNA.		SELENBP1	1q21.3
6493126	A_23_P1759	adhesion molecule, interacts with CXADR antigen 1 (AMICA1), transcript variant 2, mRNA.	Hs.16291	AMICA1	11q23.3
6493144	A_23_P315651	cytochrome b-245, alpha polypeptide		CYBA
6493195	A_24_P16420	GB|X76785.1|CAA54180.1 hypothetical protein [NP106190]
6493342	A_32_P49211	hook homolog 3 (Drosophila) (HOOK3), mRNA.	Hs.162852	HOOK3	8p11.21
6493357	A_23_P125082	Interferon regulatory factor 2	Hs.654566	IRF2	4q34.1-q35.1
6493398	A_24_P68088	testicular cell adhesion molecule 1 homolog (mouse), pseudogene (TCAM1P), non-coding RNA.		TCAM1P	17q23.3
6493408	A_32_P171747	Zinc finger protein 518B	Hs.455089	ZNF518B	4p16.1
6493461	A_24_P913835	Unknown
6493520	A_24_P118512	Unknown
6493550	A_23_P432352	chromosome X open reading frame 61 (CXorf61), mRNA.	Hs.97892	CXorf61	Xq23
6493608	A_23_P110234	casein alpha s1 (CSN1S1), transcript variant 2, mRNA.	Hs.3155	CSN1S1	4q21.1
6493676	A_24_P265051	plexin A4 (PLXNA4), transcript variant 1, mRNA.	Hs.511454	PLXNA4	7q32.3
6493706	A_24_P179577	KIAA1109 (KIAA1109), mRNA.	Hs.408142	KIAA1109	4q27
6493746	A_23_P134419	zona pellucida glycoprotein 3 (sperm receptor) (ZP3), transcript variant 2, mRNA.	Hs.656137	ZP3	7q11.23
6493828	A_32_P216030	Transcribed locus	Hs.135690		11
6493854	A_24_P189997	proprotein convertase subtilisin/kexin type 6 (PCSK6), transcript variant 1, mRNA.	Hs.498494	PCSK6	15q26.3
6493922	A_23_P251965	Zinc finger protein 273	Hs.520889	ZNF273	7q11.21
6494044	A_23_P132763	vestigial like 3 (Drosophila) (VGLL3), mRNA.	Hs.435013	VGLL3	3p12.1
6494113	A_32_P140139	coagulation factor XIII, A1 polypeptide (F13A1), mRNA.	Hs.335513	F13A1	6p25.3-p24.3
6494124	A_24_P102434	KIAA0922 (KIAA0922), transcript variant 2, mRNA.	Hs.732450	KIAA0922	4q31.3
6494126	A_24_P910262	serine/threonine/tyrosine interacting protein (STYX), transcript variant 1, mRNA.	Hs.364980	STYX	14q22.1
6494231	A_24_P926529	M-phase phosphoprotein 6	Hs.344400	MPHOSPH6	16q23.3
6494237	A_24_P31627	potassium voltage-gated channel, Shab-related subfamily, member 1 (KCNB1), mRNA.	Hs.84244	KCNB1	20q13.2
6494288	A_23_P156907	sine oculis binding protein homolog (Drosophila) (SOBP), mRNA.	Hs.445244	SOBP	6q21
6494296	A_23_P126167	potassium intermediate/small conductance calcium-activated channel, subfamily N, member 3 (KCNN3), transcript variant 2, mRNA.	Hs.490765	KCNN3	1q21.3
6494301	A_32_P149546	ciliary rootlet coiled-coil, rootletin (CROCC), mRNA.	Hs.309403	CROCC	1p36.13
6494367	A_23_P111360	heat shock transcription factor 2 (HSF2), transcript variant 1, mRNA.	Hs.158195	HSF2	6q22.31
6494390	A_23_P79289	COBL-like 1 (COBLL1), mRNA.	Hs.731890	COBLL1	2q24.3
6494415	A_24_P288298	killer cell immunoglobulin-like receptor, two domains, long cytoplasmic tail, 4 (KIR2DL4), transcript variant 3, mRNA.	Hs.661219	KIR2DL4	19q13.4
6494421	A_23_P153301	carcinoembryonic antigen-related cell adhesion molecule 5 (CEACAM5), mRNA.	Hs.709196	CEACAM5	19q13.1-q13.2
6494434	A_24_P634845	Transcribed locus	Hs.545420
6494445	A_24_P315547	Uncharacterized LOC100131170	Hs.657412	LOC100131170	17q25.3
6494455	A_32_P86365	Glycosyltransferase 25 domain containing 2	Hs.387995	GLT25D2	1q25
6494488	A_23_P214011	cadherin 6, type 2, K-cadherin (fetal kidney) (CDH6), mRNA.	Hs.124776	CDH6	5p13.3
6494580	A_24_P102261	Uncharacterized LOC100132363	Hs.690142	LOC100132363	16p13.3
6494641	A_23_P33664	epididymal sperm binding protein 1 (ELSPBP1), mRNA.	Hs.104894	ELSPBP1	19q13.33
6494734	A_32_P92355	sterile alpha motif domain containing 12 (SAMD12), transcript variant 1, mRNA.	Hs.359393	SAMD12	8q24.12
6494844	A_32_P195181	Cytochrome b5 reductase 3	Hs.561064	CYB5R3	22q13.31-qter|22q13.2-q13.31
6494939	A_32_P93309	Chromosome 11 open reading frame 73	Hs.283322	C11orf73	11q14.2
6495039	A_32_P189790	uncharacterized DKFZp779M0652 (DKFZp779M0652), non-coding RNA.		DKFZp779M0652	11p11.2
6495105	A_24_P316475	Transcription termination factor, RNA polymerase II	Hs.486818	TTF2	1p22
6495112	A_32_P181603	PREDICTED: hypothetical LOC100652876 (LOC100652876), miscRNA.		LOC100652876	16
6495116	A_23_P130509	zinc finger protein 229 (ZNF229), mRNA.	Hs.709348	ZNF229	19q13.31
6495134	A_23_P370666	glycine-N-acyltransferase-like 1 (GLYATL1), transcript variant 1, mRNA.	Hs.38085	GLYATL1	11q12.1
6495136	A_24_P356	Homo sapiens mRNA for KIAA1048 protein, partial cds. [AB028971]
6495167	A_24_P321715	Uncharacterized LOC379025	Hs.531089	FLJ31306	14q23.1
6495171	A_23_P162607	stabilin 2 (STAB2), mRNA.	Hs.408249	STAB2	12q23.3
6495240	A_24_P694820	PREDICTED: hypothetical LOC100652917 (LOC100652917), miscRNA.		LOC100652917	18
6495268	A_24_P252823	Angiomotin like 1	Hs.503594	AMOTL1	11q14.3
6495459	A_23_P97141	regulator of G-protein signaling 1 (RGS1), mRNA.	Hs.75256	RGS1	1q31
6495469	A_23_P27709	chorionic gonadotropin, beta polypeptide 2 (CGB2), mRNA.	Hs.567650	CGB2	19q13.32
6495555	A_24_P938383	family with sequence similarity 199, X-linked (FAM199X), mRNA.	Hs.496535	FAM199X	Xq22.2
6495648	A_23_P108404	ArfGAP with GTPase domain, ankyrin repeat and PH domain 1 (AGAP1), transcript variant 1, mRNA.	Hs.435039	AGAP1	2q37
6495673	A_23_P12826	STAM binding protein-like 1	Hs.16229	STAMBPL1	10q23.31
6495742	A_23_P317413	Transcribed locus, moderately similar to XP_003432906.1 PREDICTED: olfactory receptor 18-like [Canis lupus familiaris]	Hs.562946
6495761	A_23_P258194	apoptosis-inducing factor, mitochondrion-associated, 3 (AIFM3), nuclear gene encoding mitochondrial protein, transcript variant 1, mRNA.	Hs.723246	AIFM3	22q11.21
6495769	A_32_P115220	chromosome 9 open reading frame 66 (C9orf66), mRNA.	Hs.190877	C9orf66	9p24.3
6495793	A_24_P679984	Fc fragment of IgE, high affinity I, receptor for; gamma polypeptide	Hs.433300	FCER1G	1q23
6495829	A_32_P39669	ankyrin repeat domain 20 family, member A12, pseudogene (ANKRD20A12P), non-coding RNA.		ANKRD20A12P	1
6495854	A_32_P16699	Mitochondrial ribosomal protein S21	Hs.405880	MRPS21	1q21
6495907	A_23_P12079	potassium voltage-gated channel, Shaw-related subfamily, member 4 (KCNC4), transcript variant 1, mRNA.	Hs.153521	KCNC4	1p21
6496024	A_24_P374759	ELKS/RAB6-interacting/CAST family member 2 (ERC2), mRNA.	Hs.476389	ERC2	3p14.3
6496140	A_24_P96780	centromere protein F, 350/400kDa (mitosin) (CENPF), mRNA.	Hs.497741	CENPF	1q32-q41
6496231	A_23_P118025	dipeptidase 2 (DPEP2), mRNA.	Hs.372633	DPEP2	16q22.1
6496250	A_24_P114142	contactin 2 (axonal) (CNTN2), mRNA.	Hs.519220	CNTN2	1q32.1
6496300	A_24_P611182	CDNA FLJ31259 fis, clone KIDNE2005798	Hs.680584
6496305	A_32_P144133	Transcribed locus	Hs.714326		1
6496349	A_32_P170397	Uncharacterized LOC100289090	Hs.650238	LOC100289090	15q15.1
6496377	A_24_P50875	ankyrin repeat and KH domain containing 1 (ANKHD1), transcript variant 1, mRNA.	Hs.594084	ANKHD1	5q31.3
6496442	A_23_P69154	family with sequence similarity 198, member A (FAM198A), mRNA.	Hs.729533	FAM198A	3p22.1
6496487	A_32_P146485	CDNA clone IMAGE:5296720	Hs.156197		4
6496490	A_24_P128308	Kruppel-like factor 6	Hs.4055	KLF6	10p15
6496597	A_23_P29411	CDNA FLJ20123 fis, clone COL06041	Hs.610961
6496603	A_24_P918608	Uncharacterized LOC100499466	Hs.591212	LOC100499466	17q24.2
6496605	A_23_P94403	tyrosinase-related protein 1 (TYRP1), mRNA.	Hs.270279	TYRP1	9p23
6496669	A_23_P200737	regulator of G-protein signaling 4 (RGS4), transcript variant 3, mRNA.	Hs.386726	RGS4	1q23.3
6496701	A_24_P196499	AT rich interactive domain 4B (RBP1-like)	Hs.575782	ARID4B	1q42.1-q43
6496727	A_23_P384748	pleckstrin homology domain containing, family H (with MyTH4 domain) member 2 (PLEKHH2), mRNA.	Hs.164162	PLEKHH2	2p21
6496730	A_24_P862122	Transcribed locus	Hs.680698
6496734	A_24_P503492	Growth arrest-specific 5 (non-protein coding)	Hs.531856	GAS5	1q25.1
6496785	A_32_P188093	Transcribed locus	Hs.672725
6496789	A_32_P207390	Integral membrane protein 2B	Hs.643683	ITM2B	13q14.3
6496920	A_23_P57983	Poly (ADP-ribose) polymerase family, member 14	Hs.518203	PARP14	3q21.1
6496946	A_24_P937649	Major histocompatibility complex, class II, DQ beta 1	Hs.409934	HLA-DQB1	6p21.3
6496959	A_32_P221479	PREDICTED: hypothetical LOC100506174 (LOC100506174), miscRNA.		LOC100506174	19
6497058	A_23_P9621	E74-like factor 4 (ets domain transcription factor) (ELF4), transcript variant 1, mRNA.	Hs.271940	ELF4	Xq26
6497123	A_23_P170649	somatomedin B and thrombospondin, type 1 domain containing (SBSPON), mRNA.	Hs.439040	SBSPON	8q21.11
6497126	A_24_P781846	CDNA clone IMAGE:5268031	Hs.622504		15
6497204	A_24_P418717	bone morphogenetic protein receptor, type IA (BMPR1A), mRNA.	Hs.524477	BMPR1A	10q22.3
6497217	A_32_P175683	O2I2_HUMAN (Q8NGU4) Olfactory receptor 2I2, partial (98%) [THC2436248]
6497272	A_23_P32722	zinc finger protein 408 (ZNF408), transcript variant 2, mRNA.	Hs.656931	ZNF408	11p11.2
6497283	A_24_P683917	Filamin B, beta	Hs.476448	FLNB	3p14.3
6497311	A_24_P370557	proline rich Gla (G-carboxyglutamic acid) 1 (PRRG1), transcript variant 1, mRNA.	Hs.190341	PRRG1	Xp21.1
6497324	A_23_P208069	methyltransferase like 4 (METTL4), mRNA.	Hs.126888	METTL4	18p11.32
6497482	A_23_P62953	pre-B-cell leukemia homeobox 1 (PBX1), transcript variant 1, mRNA.	Hs.557097	PBX1	1q23
6497526	A_23_P98744	olfactory receptor, family 52, subfamily K, member 2 (OR52K2), mRNA.	Hs.553568	OR52K2	11p15.4
6497572	A_24_P187218	protocadherin 9 (PCDH9), transcript variant 2, mRNA.	Hs.654709	PCDH9	13q21.32
6497574	A_32_P231941	Chromosome 17 open reading frame 108	Hs.434386	C17orf108	17q11.2
6497593	A_32_P23374	dihydrolipoamide S-succinyltransferase pseudogene 1		DLSTP1
6497686	A_24_P334718	G protein-coupled receptor 141 (GPR141), mRNA.	Hs.688230	GPR141	7p14.1
6497692	A_32_P321996	WDFY family member 4 (WDFY4), mRNA.	Hs.287379	WDFY4	10q11.23
6497754	A_23_P23421	Rho guanine nucleotide exchange factor (GEF) 11 (ARHGEF11), transcript variant 2, mRNA.	Hs.516954	ARHGEF11	1q21
6497757	A_32_P886028	CDNA FLJ11942 fis, clone HEMBB1000652	Hs.677080
6497851	A_23_P148879	ATPase, Na+/K+ transporting, alpha 2 polypeptide (ATP1A2), mRNA.	Hs.34114	ATP1A2	1q21-q23
6497908	A_32_P167239	actin filament associated protein 1-like 1 (AFAP1L1), transcript variant 1, mRNA.	Hs.483793	AFAP1L1	5q32
6497952	A_24_P229536	long intergenic non-protein coding RNA 478 (LINC00478), transcript variant 2, non-coding RNA.		LINC00478	21q21.1
6498051	A_23_P337155	target of myb1-like 2 (chicken) (TOM1L2), transcript variant 3, mRNA.	Hs.462379	TOM1L2	17p11.2
6498060	A_23_P91081	epithelial cell adhesion molecule (EPCAM), mRNA.	Hs.542050	EPCAM	2p21
6498125	A_24_P733345	hypothetical protein LOC650938		LOC650938
6498293	A_24_P933305	Unknown
6498302	A_23_P18123	neuroligin 1 (NLGN1), mRNA.	Hs.478289	NLGN1	3q26.31
6498308	A_23_P74701	collagen, type XXIV, alpha 1 (COL24A1), mRNA.	Hs.659516	COL24A1	1p22.3
6498329	A_24_P945160	3-phosphoinositide dependent protein kinase-1	Hs.459691	PDPK1	16p13.3
6498400	A_24_P67148	PREDICTED: hypothetical protein LOC100653022 (LOC100653022), mRNA.		LOC100653022	12
6498672	A_24_P261417	dickkopf 3 homolog (Xenopus laevis) (DKK3), transcript variant 2, mRNA.	Hs.292156	DKK3	11p15.2
6498747	A_32_P122492	Transcribed locus	Hs.543408
6498795	A_24_P397498	thiopurine S-methyltransferase (TPMT), mRNA.	Hs.444319	TPMT	6p22.3
6498938	A_24_P160969	tumor protein p53 inducible protein 11 (TP53I11), transcript variant 1, mRNA.		TP53I11	11p11.2
6499049	A_24_P593120	BF949582 MR3-NN0218-031100-003-a11 NN0218 Homo sapiens cDNA, mRNA sequence [BF949582]
6499082	A_24_P221660	zinc finger and BTB domain containing 41 (ZBTB41), mRNA.	Hs.529439	ZBTB41	1q31.3
6499087	A_24_P703674	CDNA FLJ13845 fis, clone THYRO1000815	Hs.667880		1
6499132	A_23_P416965	Family with sequence similarity 149, member A	Hs.731883	FAM149A	4q35.1
6499164	A_23_P200579	chymotrypsin-like elastase family, member 3A (CELA3A), mRNA.	Hs.181289	CELA3A	1p36.12
6499191	A_24_P273253	AHNAK nucleoprotein 2 (AHNAK2), mRNA.	Hs.441783	AHNAK2	14q32.33
6499218	A_24_P171043	Transcribed locus, strongly similar to XP_001173521.1 PREDICTED: hypothetical protein [Pan troglodytes]	Hs.567600
6499323	A_23_P169003	SH2 domain containing 4A (SH2D4A), transcript variant 1, mRNA.	Hs.303208	SH2D4A	8p21.2
6499345	A_23_P253350	chromosome 8 open reading frame 4 (C8orf4), mRNA.	Hs.591849	C8orf4	8p11.2
6499370	A_32_P75681	Uncharacterized LOC643401	Hs.533212	LOC643401	5p14.1
6499427	A_23_P85453	CD244 molecule, natural killer cell receptor 2B4 (CD244), transcript variant 3, mRNA.	Hs.157872	CD244	1q23.3
6499452	A_23_P392928	tetraspanin 33 (TSPAN33), mRNA.	Hs.27267	TSPAN33	7q32.1
6499574	A_32_P776863	chromosome 2 open reading frame 61 (C2orf61), transcript variant 2, mRNA.	Hs.531575	C2orf61	2p21
6499614	A_32_P32343	Transcribed locus	Hs.130268		8
6499640	A_24_P112447	ectonucleoside triphosphate diphosphohydrolase 7 (ENTPD7), mRNA.	Hs.740488	ENTPD7	10q23-q24
6499699	A_24_P410453	spectrin repeat containing, nuclear envelope 1 (SYNE1), transcript variant 2, mRNA.	Hs.12967	SYNE1	6q25
6499734	A_32_P880454	Transcribed locus	Hs.735377
6499793	A_32_P188825	tudor domain containing 12 (TDRD12), mRNA.	Hs.646351	TDRD12	19q13.11
6499833	A_23_P358394	family with sequence similarity 65, member B (FAM65B), transcript variant 2, mRNA.	Hs.559459	FAM65B	6p22.3-p21.32
6499884	A_32_P96124	Inverted formin, FH2 and WH2 domain containing	Hs.24956	INF2	14q32.33
6499895	A_23_P250485	tripartite motif containing 62 (TRIM62), mRNA.	Hs.656006	TRIM62	1p35.1
6499910	A_23_P101073	olfactory receptor, family 1, subfamily E, member 1 (OR1E1), mRNA.	Hs.278485	OR1E1	17p13.3
6499915	A_23_P54243	G protein-coupled receptor 68 (GPR68), transcript variant 2, mRNA.	Hs.8882	GPR68	14q31
6499993	A_24_P813730	B40201 artifact-warning sequence (translated ALU class B) - human {Homo sapiens;} , partial (11%) [THC2378508]
6500016	A_23_P887	inhibitor of kappa light polypeptide gene enhancer in B-cells, kinase epsilon (IKBKE), transcript variant 3, mRNA.	Hs.321045	IKBKE	1q32.1
6500110	A_32_P135749	Unknown
6500216	A_24_P928340	Full length insert cDNA clone ZC35F11	Hs.633732
6500242	A_23_P28582	hypothetical protein FLJ14082		FLJ14082
6500290	A_24_P149902	suppressor of fused homolog (Drosophila) (SUFU), transcript variant 1, mRNA.	Hs.404089	SUFU	10q24.32
6500378	A_23_P49145	zymogen granule protein 16 homolog (rat) (ZG16), mRNA.	Hs.632195	ZG16	16p11.2
6500439	A_32_P66908	CXXC finger protein 4 (CXXC4), mRNA.	Hs.12248	CXXC4	4q22-q24
6500531	A_24_P152911	zinc finger protein 311 (ZNF311), mRNA.	Hs.148218	ZNF311	6p22.1
6500590	A_24_P657117	Transcribed locus	Hs.661605
6500673	A_24_P940863	Ankyrin repeat and MYND domain containing 1	Hs.656615	ANKMY1	2q37.3
6500744	A_24_P854896	THAP9 antisense RNA 1 (non-protein coding) (THAP9-AS1), transcript variant 2, non-coding RNA.		THAP9-AS1	4
6500856	A_24_P169386	Chromosome 2 open reading frame 84	Hs.467868	C2orf84	2p23.3
6500907	A_23_P84202	WD repeat domain 25 (WDR25), transcript variant 2, mRNA.	Hs.497600	WDR25	14q32.2
6500942	A_23_P258234	Discoidin, CUB and LCCL domain containing 1	Hs.658304	DCBLD1	6q22.1
6501036	A_32_P148538	lipid phosphate phosphatase-related protein type 4 (LPPR4), transcript variant 2, mRNA.	Hs.13245	LPPR4	1p21.2
6501090	A_23_P113258	RAS guanyl releasing protein 1 (calcium and DAG-regulated) (RASGRP1), transcript variant 2, mRNA.	Hs.591127	RASGRP1	15q14
6501125	A_24_P932083	Transcribed locus	Hs.689629
6501141	A_24_P153820	HYDIN, axonemal central pair apparatus protein	Hs.461229	HYDIN	16q22.2
6501165	A_23_P81926	psoriasis susceptibility 1 candidate 2 (PSORS1C2), mRNA.	Hs.146824	PSORS1C2	6p21.3
6501179	A_23_P301105	schlafen family member 13 (SLFN13), mRNA.	Hs.462833	SLFN13	17q12
6501237	A_24_P607195	Transcribed locus	Hs.671801
6501482	A_23_P207774	kinase suppressor of ras 1 (KSR1), mRNA.	Hs.133534	KSR1	17q11.2
6501500	A_24_P169937	NLR family, CARD domain containing 3 (NLRC3), mRNA.	Hs.740560	NLRC3	16p13.3
6501542	A_24_P85322	Zinc finger, FYVE domain containing 26	Hs.98041	ZFYVE26	14q24.1
6501570	A_32_P30238	Unknown
6501585	A_23_P1452	neuropeptide FF receptor 1 (NPFFR1), mRNA.	Hs.302026	NPFFR1	10q21-q22
6501630	A_24_P109703	Unknown
6501736	A_24_P940385	Unknown
6501747	A_23_P81640	pleckstrin homology domain containing, family G (with RhoGef domain) member 4B (PLEKHG4B), mRNA.	Hs.535800	PLEKHG4B	5p15.33
6501822	A_23_P36531	tetraspanin 8 (TSPAN8), mRNA.	Hs.170563	TSPAN8	12q14.1-q21.1
6501952	A_24_P211689	chromosome X open reading frame 38 (CXorf38), mRNA.	Hs.495961	CXorf38	Xp11.4
6502146	A_23_P45536	MCF.2 cell line derived transforming sequence (MCF2), transcript variant 3, mRNA.	Hs.387262	MCF2	Xq27
6502173	A_32_P179590	Polyhomeotic homolog 3 (Drosophila)	Hs.529592	PHC3	3q26.2
6502267	A_23_P119500	tumor necrosis factor, alpha-induced protein 8-like 1 (TNFAIP8L1), transcript variant 2, mRNA.	Hs.465643	TNFAIP8L1	19p13.3
6502296	A_24_P332981	major histocompatibility complex, class II, DO alpha (HLA-DOA), mRNA.	Hs.631991	HLA-DOA	6p21.3
6502345	A_32_P118655	C-terminal binding protein 1		CTBP1
6502395	A_32_P71730	Transcribed locus	Hs.662664
6502439	A_32_P162066	family with sequence similarity 105, member A (FAM105A), mRNA.	Hs.155085	FAM105A	5p15.2
6502487	A_23_P311410	Folliculin	Hs.31652	FLCN	17p11.2
6502554	A_24_P871208	PREDICTED: hypothetical LOC100505697 (LOC100505697), miscRNA.		LOC100505697	6
6502672	A_23_P412962	T-box 19 (TBX19), mRNA.	Hs.716656	TBX19	1q24.2
6502862	A_23_P147245	oxysterol binding protein-like 10 (OSBPL10), transcript variant 2, mRNA.	Hs.150122	OSBPL10	3p22.3
6502867	A_32_P34444	formin homology 2 domain containing 3 (FHOD3), mRNA.	Hs.630884	FHOD3	18q12
6502904	A_24_P926875	Transcribed locus	Hs.621389
6502952	A_32_P21794	Transcribed locus	Hs.733869
6503014	A_24_P255986	speedy homolog E4 (Xenopus laevis) (SPDYE4), mRNA.	Hs.368429	SPDYE4	17p13.1
6503125	A_24_P922252	spermatogenesis associated 5-like 1		SPATA5L1
6503166	A_23_P134887	Phosphatidylinositol-3,4,5-trisphosphate-dependent Rac exchange factor 2	Hs.591867	PREX2	8q13.2
6503172	A_23_P134502	frizzled family receptor 1 (FZD1), mRNA.	Hs.94234	FZD1	7q21
6503196	A_32_P133290	Long intergenic non-protein coding RNA 174	Hs.50755	LINC00174	7q11.21
6503225	A_24_P396340	chromosome 1 open reading frame 212 (C1orf212), transcript variant 2, mRNA.	Hs.27160	C1orf212	1p34.3
6503245	A_24_P515319	family with sequence similarity 90, member A7, pseudogene (FAM90A7P), non-coding RNA.		FAM90A7P	8p23.1
6503352	A_32_P125687	ALU8_HUMAN (P39195) Alu subfamily SX sequence contamination warning entry, partial (12%) [THC2375753]
6503386	A_32_P350	Dynein, cytoplasmic 1, intermediate chain 2	Hs.740510	DYNC1I2	2q31.1
6503421	A_23_P117515	AT rich interactive domain 4A (RBP1-like) (ARID4A), transcript variant 3, mRNA.	Hs.161000	ARID4A	14q23.1
6503425	A_23_P379200	formin-like 3 (FMNL3), transcript variant 2, mRNA.	Hs.179838	FMNL3	12q13.12
6503445	A_23_P300867	mirror-image polydactyly 1 (MIPOL1), transcript variant 2, mRNA.	Hs.660396	MIPOL1	14q13.3
6503467	A_23_P408376	heat shock 70kDa protein 12A (HSPA12A), mRNA.	Hs.648448	HSPA12A	10q26.12
6503469	A_24_P941670	eukaryotic translation initiation factor 2C, 4 (EIF2C4), mRNA.	Hs.471492	EIF2C4	1p34
6503511	A_24_P941866	Chromosome 5 open reading frame 56	Hs.658288	C5orf56	5q31.1
6503593	A_23_P390726	tetratricopeptide repeat domain 23-like (TTC23L), mRNA.	Hs.435742	TTC23L	5p13.2
6503657	A_23_P133536	calcyphosine-like (CAPSL), transcript variant 2, mRNA.	Hs.55150	CAPSL	5p13.2
6503663	A_24_P397386	leukemia inhibitory factor receptor alpha (LIFR), transcript variant 1, mRNA.	Hs.133421	LIFR	5p13-p12
6503761	A_32_P72067	Rho GTPase activating protein 24	Hs.444229	ARHGAP24	4q22.1
6504038	A_23_P102017	ermin, ERM-like protein (ERMN), transcript variant 1, mRNA.	Hs.443894	ERMN	2q24.1
6504106	A_32_P150642	Transcribed locus	Hs.571914
6504193	A_24_P910310	microphthalmia-associated transcription factor (MITF), transcript variant 2, mRNA.	Hs.166017	MITF	3p14.2-p14.1
6504247	A_23_P127231	Frequently rearranged in advanced T-cell lymphomas	Hs.126057	FRAT1	10q24.1
6504317	A_23_P337689	WT1 antisense RNA (non-protein coding) (WT1-AS), non-coding RNA.		WT1-AS	11p13
6504339	A_24_P886960	PREDICTED: hypothetical LOC100287049 (LOC100287049), miscRNA.		LOC100287049	1
6504420	A_23_P22526	hephaestin (HEPH), transcript variant 3, mRNA.	Hs.31720	HEPH	Xq11-q12
6504519	A_24_P316019	PREDICTED: golgin subfamily A member 8-like protein 2-like (LOC100652910), mRNA.		LOC100652910	15
6504524	A_23_P123108	A kinase (PRKA) anchor protein (yotiao) 9	Hs.651221	AKAP9	7q21-q22
6504565	A_32_P126023	Tumor necrosis factor (ligand) superfamily, member 10	Hs.478275	TNFSF10	3q26
6504701	A_32_P133518	SMT3 suppressor of mif two 3 homolog 1 (S. cerevisiae)	Hs.81424	SUMO1	2q33
6504877	A_24_P942296	CCR4-NOT transcription complex, subunit 2	Hs.133350	CNOT2	12q15
6504887	A_23_P322116	transcription factor AP-2 epsilon (activating enhancer binding protein 2 epsilon) (TFAP2E), mRNA.	Hs.567844	TFAP2E	1p34.3
6504913	A_23_P113380	ubiquitin specific peptidase 47 (USP47), mRNA.	Hs.577256	USP47	11p15.3
6504998	A_24_P390495	chemokine (C-X3-C motif) ligand 1 (CX3CL1), mRNA.	Hs.531668	CX3CL1	16q13
6505044	A_32_P542874	tet methylcytosine dioxygenase 3 (TET3), mRNA.	Hs.516107	TET3	2p13.1
6505051	A_24_P265003	PREDICTED: putative uncharacterized protein LOC65996-like (LOC100506458), miscRNA.		LOC100506458	7
6505061	A_24_P222291	ATP-binding cassette, sub-family C (CFTR/MRP), member 4 (ABCC4), transcript variant 1, mRNA.	Hs.508423	ABCC4	13q32
6505191	A_24_P900555	Unknown
6505241	A_24_P65851	protein phosphatase 4, regulatory subunit 1-like (PPP4R1L), non-coding RNA.		PPP4R1L	20q13.32
6505313	A_23_P1912	zona pellucida glycoprotein 1 (sperm receptor) (ZP1), mRNA.	Hs.172130	ZP1	11q12.2
6505497	A_23_P310492	shisa homolog 7 (Xenopus laevis) (SHISA7), mRNA.	Hs.6664	SHISA7	19q13.42
6505670	A_23_P85765	calcium channel, voltage-dependent, L type, alpha 1S subunit (CACNA1S), mRNA.	Hs.1294	CACNA1S	1q32
6505696	A_32_P32338	RIO kinase 3 (yeast)	Hs.445511	RIOK3	18q11.2
6505701	A_23_P67381	sulfotransferase family, cytosolic, 2A, dehydroepiandrosterone (DHEA)-preferring, member 1 (SULT2A1), mRNA.	Hs.515835	SULT2A1	19q13.3
6505704	A_23_P64879	potassium inwardly-rectifying channel, subfamily J, member 8 (KCNJ8), mRNA.	Hs.102308	KCNJ8	12p11.23
6505803	A_24_P23190	coiled-coil domain containing 117 (CCDC117), mRNA.	Hs.406460	CCDC117	22q12.1
6505849	A_24_P196382	ATG3 autophagy related 3 homolog (S. cerevisiae)	Hs.477126	ATG3	3q13.2
6506218	A_24_P126093	motile sperm domain containing 2 (MOSPD2), transcript variant 2, mRNA.	Hs.731687	MOSPD2	Xp22.2
6506554	A_23_P71635	Unknown
6506572	A_23_P203716	sialidase 3 (membrane sialidase) (NEU3), mRNA.	Hs.191074	NEU3	11q13.5
6506585	A_24_P511143	Transcribed locus	Hs.678178
6506636	A_32_P65954	Coiled-coil domain containing 126	Hs.232296	CCDC126	7p15.3
6506638	A_24_P932760	Kinesin light chain 1	Hs.20107	KLC1	14q32.3
6506831	A_32_P79763	Tudor domain containing 12	Hs.729739	TDRD12	19q13.11
6506834	A_24_P835921	Guanine nucleotide binding protein (G protein), beta polypeptide 4	Hs.173030	GNB4	3q26.33
6506868	A_24_P34066	SIK family kinase 3	Hs.167451	SIK3	11q23.3
6506878	A_23_P329924	hydroxycarboxylic acid receptor 2 (HCAR2), mRNA.	Hs.524812	HCAR2	12q24.31
6506964	A_32_P155035	PREDICTED: hypothetical LOC100506411 (LOC100506411), miscRNA.		LOC100506411	14
6507155	A_24_P589028	CDNA: FLJ23097 fis, clone LNG07418	Hs.152432		8
6507330	A_32_P377032	long intergenic non-protein coding RNA 471 (LINC00471), non-coding RNA.		LINC00471	2q37.1
6507355	A_23_P32115	lipocalin 12 (LCN12), mRNA.	Hs.440519	LCN12	9q34.3
6507467	A_32_P170905	Transcribed locus	Hs.563241
6507495	A_32_P235358	uncharacterized LOC100130476 (LOC100130476), non-coding RNA.		LOC100130476	6q23.3
6507590	A_23_P215111	ATPase, H+ transporting, lysosomal V0 subunit a4 (ATP6V0A4), transcript variant 2, mRNA.	Hs.98967	ATP6V0A4	7q34
6507595	A_32_P176018	actin-like 8 (ACTL8), mRNA.	Hs.2149	ACTL8	1p36.2-p35
6507606	A_24_P66780	family with sequence similarity 83, member B (FAM83B), mRNA.	Hs.657974	FAM83B	6p12.1
6507608	A_24_P359100	Uncharacterized LOC644083	Hs.653211	LOC644083	1p36.13
6507618	A_23_P377245	uncharacterized LOC653160 (LOC653160), non-coding RNA.		LOC653160	1p34.3
6507638	A_24_P75917	coiled-coil domain containing 144A (CCDC144A), mRNA.	Hs.740778	CCDC144A	17p11.2
6507700	A_32_P14721	dynein, axonemal, heavy chain 12 (DNAH12), transcript variant 1, mRNA.	Hs.201378	DNAH12	3p14.3
6507861	A_23_P254967	Amylase, alpha 2B (pancreatic)	Hs.484588	AMY2B	1p21
6507868	A_23_P407992	Crm, cramped-like (Drosophila) (CRAMP1L), mRNA.	Hs.603676	CRAMP1L	16p13.3
6507888	A_24_P237936	transcription factor 23 (TCF23), mRNA.	Hs.591583	TCF23	2p23.3
6507919	A_32_P216809	Peptidase (mitochondrial processing) beta	Hs.184211	PMPCB	7q22.1
6508018	A_23_P73632	nuclear receptor subfamily 0, group B, member 1 (NR0B1), mRNA.	Hs.268490	NR0B1	Xp21.3
6508021	A_32_P194171	Unknown
6508027	A_24_P323425	double zinc ribbon and ankyrin repeat domains 1 (DZANK1), mRNA.	Hs.472225	DZANK1	20p11.23
6508082	A_24_P918907	family with sequence similarity 115, member C pseudogene (LOC154761), non-coding RNA.		LOC154761	7q35
6508108	A_32_P24731	Transcribed locus	Hs.671761
6508180	A_23_P114423	regucalcin (senescence marker protein-30) (RGN), transcript variant 2, mRNA.	Hs.77854	RGN	Xp11.3
6508244	A_23_P408249	phosphoenolpyruvate carboxykinase 1 (soluble) (PCK1), mRNA.	Hs.1872	PCK1	20q13.31
6508370	A_23_P136254	sarcoglycan, delta (35kDa dystrophin-associated glycoprotein) (SGCD), transcript variant 3, mRNA.	Hs.387207	SGCD	5q33-q34
6508474	A_24_P740244	AA987359 or92g02.s1 NCI_CGAP_Lu5 Homo sapiens cDNA clone IMAGE:1603346 3', mRNA sequence [AA987359]
6508499	A_23_P75707	olfactory receptor, family 8, subfamily H, member 1 (OR8H1), mRNA.	Hs.553628	OR8H1	11q12.1
6508504	A_32_P9455	POTE ankyrin domain family, member F (POTEF), mRNA.	Hs.580547	POTEF	2q21.1
6508557	A_24_P401916	Notch 2 N-terminal like	Hs.728902	NOTCH2NL	1q21.2
6508819	A_32_P899436	UHRF1 binding protein 1 (UHRF1BP1), mRNA.	Hs.700656	UHRF1BP1	6p21
6508893	A_24_P592487	uncharacterized LOC401320 (LOC401320), non-coding RNA.		LOC401320	7p15.1
6508899	A_24_P388190	potassium channel, subfamily K, member 3 (KCNK3), mRNA.	Hs.645288	KCNK3	2p23
6508970	A_23_P371933	Hydroxysteroid (17-beta) dehydrogenase 12	Hs.132513	HSD17B12	11p11.2
6508974	A_32_P162537	Transcribed locus	Hs.598460
6508991	A_32_P118657	CDNA FLJ11982 fis, clone HEMBB1001335	Hs.655591
6509012	A_32_P16954	fragile X mental retardation, autosomal homolog 1 (FXR1), transcript variant 3, mRNA.	Hs.478407	FXR1	3q28
6509094	A_24_P645900	CDNA FLJ13833 fis, clone THYRO1000676	Hs.677252
6509143	A_24_P206624	fibroblast growth factor receptor 2 (FGFR2), transcript variant 4, mRNA.	Hs.533683	FGFR2	10q26
6509191	A_24_P926189	Unknown
6509523	A_24_P87114	ubiquitin specific peptidase 30 (USP30), mRNA.	Hs.486434	USP30	12q24.11
6509574	A_23_P32474	CUB domain containing protein 1 (CDCP1), transcript variant 1, mRNA.	Hs.476093	CDCP1	3p21.31
6509652	A_32_P99933	full-length cDNA clone CS0DL009YE09 of B cells (Ramos cell line) Cot 25-normalized of Homo sapiens (human). [CR609715]
6509659	A_32_P38989	chemokine (C-X-C motif) receptor 2 pseudogene 1 (CXCR2P1), non-coding RNA.		CXCR2P1	2q35
6509749	A_23_P19754	carboxypeptidase A4 (CPA4), transcript variant 2, mRNA.	Hs.93764	CPA4	7q32
6509751	A_24_P922349	Unknown
6509795	A_23_P353667	MIR7-3 host gene (non-protein coding) (MIR7-3HG), non-coding RNA.		MIR7-3HG	19p13.3
6509810	A_24_P945181	RNA binding motif protein 15B (RBM15B), mRNA.	Hs.118738	RBM15B	3p21.2
6509824	A_23_P208334	phosphodiesterase 4A, cAMP-specific (PDE4A), transcript variant 2, mRNA.	Hs.89901	PDE4A	19p13.2
6509882	A_24_P544485	Uncharacterized LOC253039	Hs.594170	LOC253039	9q33.2
6510058	A_24_P922288	transmembrane and coiled-coil domain family 1 (TMCC1), transcript variant 1, mRNA.	Hs.477547	TMCC1	3q22.1
6510083	A_24_P66312	keratin associated protein 12-1 (KRTAP12-1), mRNA.	Hs.688628	KRTAP12-1	21q22.3
6510085	A_24_P48627	Protein inhibitor of activated STAT, 4	Hs.105779	PIAS4	19p13.3
6510232	A_24_P928986	K(lysine) acetyltransferase 6A	Hs.491577	KAT6A	8p11
6510312	A_23_P127727	macrophage expressed 1 (MPEG1), mRNA.	Hs.740455	MPEG1	11q12.1
6510454	A_23_P68577	uncharacterized LOC29075 (HSPC072), transcript variant 1, non-coding RNA.		HSPC072	20p11.23
6510494	A_32_P194423	Unknown
6510522	A_23_P212050	butyrylcholinesterase (BCHE), mRNA.	Hs.420483	BCHE	3q26.1-q26.2
6510577	A_24_P931874	Myeloid/lymphoid or mixed-lineage leukemia (trithorax homolog, Drosophila)	Hs.258855	MLL	11q23
6510597	A_23_P26640	chromosome 16 open reading frame 89 (C16orf89), transcript variant 2, mRNA.	Hs.11782	C16orf89	16p13.3
6510710	A_32_P155832	Transcribed locus	Hs.135067		4
6510778	A_23_P336083	RUN and FYVE domain containing 3 (RUFY3), transcript variant 2, mRNA.	Hs.718875	RUFY3	4q13.3
6510889	A_32_P30630	Q9L015 (Q9L015) KHG/KDPG aldolase, partial (6%) [THC2376764]
6510960	A_23_P97096	opticin (OPTC), mRNA.	Hs.632468	OPTC	1q32.1
6510961	A_23_P63096	von Hippel-Lindau tumor suppressor-like (VHLL), mRNA.	Hs.532378	VHLL	1q22
6510980	A_32_P120211	Transcribed locus	Hs.43744		4
6511052	A_24_P398147	nebulette (NEBL), transcript variant 1, mRNA.	Hs.5025	NEBL	10p12
6511087	A_24_P330822	HNF1 homeobox B (HNF1B), transcript variant 2, mRNA.	Hs.191144	HNF1B	17q12
6511150	A_24_P253588	Homocysteine-inducible, endoplasmic reticulum stress-inducible, ubiquitin-like domain member 1	Hs.146393	HERPUD1	16q13
6511158	A_32_P220770	HLA complex group 26 (non-protein coding) (HCG26), non-coding RNA.		HCG26	6p21.3
6511182	A_23_P165414	PHOSPHO2-KLHL23 readthrough (PHOSPHO2-KLHL23), mRNA.	Hs.655150	PHOSPHO2-KLHL23	2q
6511286	A_23_P136125	fibrinogen beta chain (FGB), transcript variant 2, mRNA.	Hs.300774	FGB	4q28
6511333	A_23_P342275	ADAM metallopeptidase with thrombospondin type 1 motif, 1 (ADAMTS1), mRNA.	Hs.643357	ADAMTS1	21q21.2
6511518	A_23_P136504	solute carrier family 25 (mitochondrial oxoadipate carrier), member 21 (SLC25A21), nuclear gene encoding mitochondrial protein, transcript variant 1, mRNA.	Hs.730857	SLC25A21	14q11.2
6511561	A_24_P76635	ARP3 actin-related protein 3 homolog C (yeast) (ACTR3C), transcript variant 2, mRNA.	Hs.664579	ACTR3C	7q36.1
6511564	A_32_P16323	Transcribed locus	Hs.562564
6511618	A_23_P344694	Myeloid/lymphoid or mixed-lineage leukemia (trithorax homolog, Drosophila); translocated to, 4	Hs.614974	MLLT4	6q27
6511623	A_24_P785853	CDNA clone IMAGE:4791593	Hs.147878		4
6511671	A_24_P923945	Ubiquitin protein ligase E3 component n-recognin 4	Hs.148078	UBR4	1p36.13
6511741	A_23_P354326	Uncharacterized protein FLJ31713	Hs.350785	FLJ31713	9q32
6511745	A_23_P132515	SID1 transmembrane family, member 1 (SIDT1), mRNA.	Hs.591291	SIDT1	3q13.2
6511790	A_32_P99648	eukaryotic translation initiation factor 4E family member 3 (EIF4E3), transcript variant 1, mRNA.	Hs.581355	EIF4E3	3p14
6511839	A_23_P25150	homeobox C9 (HOXC9), mRNA.	Hs.658823	HOXC9	12q13.3
6511868	A_32_P163937	Transcribed locus	Hs.223583		15
6511910	A_24_P202329	Rho GTPase activating protein 27 pseudogene (LOC146880), transcript variant 2, non-coding RNA.		LOC146880	17q24
6511973	A_32_P88764	Uncharacterized LOC221272	Hs.586272	LOC221272	6q22.1
6512040	A_32_P16339	aprataxin and PNKP like factor (APLF), mRNA.	Hs.720369	APLF	2p13.3
6512048	A_23_P144123	solute carrier family 22 (organic anion transporter), member 13 (SLC22A13), mRNA.	Hs.225941	SLC22A13	3p21.3
6512195	A_32_P823560	kelch-like 33 (Drosophila) (KLHL33), mRNA.	Hs.556014	KLHL33	14q11.2
6512220	A_24_P208595	anthrax toxin receptor 1 (ANTXR1), transcript variant 3, mRNA.	Hs.165859	ANTXR1	2p13.1
6512240	A_23_P201510	Fc receptor, IgA, IgM, high affinity (FCAMR), transcript variant 3, mRNA.	Hs.145519	FCAMR	1q32.1
6512245	A_24_P146683	microseminoprotein, beta- (MSMB), transcript variant PSP94, mRNA.	Hs.255462	MSMB	10q11.2
6512322	A_23_P213508	proprotein convertase subtilisin/kexin type 1 (PCSK1), transcript variant 2, mRNA.	Hs.78977	PCSK1	5q15-q21
6512346	A_23_P78840	killer cell immunoglobulin-like receptor, two domains, short cytoplasmic tail, 2 (KIR2DS2), mRNA.	Hs.512572	KIR2DS2	19q13.4
6512351	A_24_P136402	myeloid/lymphoid or mixed-lineage leukemia (trithorax homolog, Drosophila) (MLL), transcript variant 2, mRNA.	Hs.258855	MLL	11q23
6512372	A_24_P769529	lin-28 homolog B (C. elegans) (LIN28B), mRNA.	Hs.23616	LIN28B	6q21
6512415	A_23_P77908	solute carrier family 47, member 2 (SLC47A2), transcript variant 2, mRNA.	Hs.126830	SLC47A2	17p11.2
6512462	A_23_P314691	tRNA-yW synthesizing protein 5 (TYW5), transcript variant 1, mRNA.	Hs.204619	TYW5	2q33.1
6512477	A_23_P71880	serine peptidase inhibitor, Kazal type 4 (SPINK4), mRNA.	Hs.555934	SPINK4	9p13.3
6512504	A_24_P85498	Uncharacterized LOC100271840	Hs.648234	LOC100271840
6512511	A_24_P728115	CDNA: FLJ21284 fis, clone COL01911	Hs.677297		7
6512532	A_23_P140434	myosin VC (MYO5C), mRNA.	Hs.487036	MYO5C	15q21
6512535	A_24_P223874	surfactant protein A2 (SFTPA2), mRNA.	Hs.523084	SFTPA2	10q22.3
6512769	A_23_P58108	HGF activator (HGFAC), mRNA.	Hs.104	HGFAC	4p16
6512858	A_32_P18357	Protein phosphatase 2, regulatory subunit B'', gamma	Hs.530712	PPP2R3C	14q13.2
6512893	A_24_P359020	chromosome 12 open reading frame 26 (C12orf26), mRNA.	Hs.506222	C12orf26	12q21.31
6512938	A_32_P114831	Beta-2-microglobulin	Hs.534255	B2M	15q21-q22.2
6513052	A_24_P931889	Transmembrane protein 131	Hs.469376	TMEM131	2q11.2
6513133	A_32_P180185	Unknown
6513184	A_23_P110253	v-kit Hardy-Zuckerman 4 feline sarcoma viral oncogene homolog (KIT), transcript variant 2, mRNA.	Hs.479754	KIT	4q11-q12
6513264	A_23_P502590	killer cell immunoglobulin-like receptor, two domains, short cytoplasmic tail, 4 (KIR2DS4), mRNA.	Hs.654608	KIR2DS4	19q13.4
6513271	A_24_P912439	AT-hook transcription factor	Hs.494895	AKNA	9q32
6513340	A_32_P192834	Unknown
6513444	A_23_P105368	Hypothetical LOC114130, mRNA (cDNA clone IMAGE:3937896)	Hs.736866
6513567	A_23_P69100	Rho guanine nucleotide exchange factor (GEF) 26 (ARHGEF26), transcript variant 2, mRNA.	Hs.240845	ARHGEF26	3q25.2
6513572	A_32_P120120	Cold shock domain containing E1, RNA-binding	Hs.69855	CSDE1	1p22
6513636	A_32_P219970	Transcribed locus	Hs.736020
6513642	A_23_P351	erythrocyte membrane protein band 4.1 (elliptocytosis 1, RH-linked) (EPB41), transcript variant 2, mRNA.	Hs.175437	EPB41	1p33-p32
6513660	A_24_P41524	PHD finger protein 21A (PHF21A), transcript variant 1, mRNA.	Hs.502458	PHF21A	11p11.2
6513737	A_32_P85379	Annexin A2	Hs.511605	ANXA2	15q22.2
6513764	A_32_P31744	CDNA FLJ11602 fis, clone HEMBA1003908	Hs.653123
6513802	A_23_P393034	hyaluronan synthase 3 (HAS3), transcript variant 1, mRNA.	Hs.592069	HAS3	16q22.1
6513848	A_24_P849319	Clone 23821 mRNA sequence	Hs.657062
6513874	A_24_P332941	autophagy related 2B (ATG2B), mRNA.	Hs.168241	ATG2B	14q32.2
6513880	A_24_P343559	neurotrophic tyrosine kinase, receptor, type 2 (NTRK2), transcript variant c, mRNA.	Hs.494312	NTRK2	9q22.1
6513968	A_32_P158892	SLIT and NTRK-like family, member 4 (SLITRK4), transcript variant 2, mRNA.	Hs.272284	SLITRK4	Xq27.3
6513969	A_24_P299489	Nuclear transcription factor Y, gamma	Hs.713051	NFYC	1p32|1p32
6513997	A_32_P87491	Clone 23948 mRNA sequence	Hs.655686
6514013	A_24_P17085	Homo sapiens GL013 mRNA, complete cds. [AF361491]
6514031	A_24_P888859	Uncharacterized LOC100859930	Hs.655606	LOC100859930	5q35.3
6514114	A_24_P85537	mitogen-activated protein kinase kinase kinase 13 (MAP3K13), transcript variant 2, mRNA.	Hs.634586	MAP3K13	3q27
6514134	A_32_P9048	PREDICTED: hypothetical LOC100507347 (LOC100507347), miscRNA.		LOC100507347	10
6514160	A_23_P316582	zinc finger protein 441 (ZNF441), mRNA.	Hs.675132	ZNF441	19p13.2
6514188	A_23_P109193	N-ethylmaleimide-sensitive factor attachment protein, beta (NAPB), mRNA.	Hs.269471	NAPB	20p12.3-p11.21
6514262	A_23_P424900	chromosome 1 open reading frame 88 (C1orf88), mRNA.	Hs.172510	C1orf88	1p13.2
6514315	A_32_P72927	Transcribed locus	Hs.674096
6514316	A_23_P81369	ADAM metallopeptidase domain 19 (ADAM19), mRNA.	Hs.483944	ADAM19	5q33.3
6514325	A_24_P935045	Transcribed locus, strongly similar to NP_660305.2 glycerate kinase isoform 1 [Homo sapiens]	Hs.667391
6514343	A_24_P16592	Transcribed locus	Hs.720531
6514365	A_24_P830696	strawberry notch homolog 1 (Drosophila) (SBNO1), transcript variant 2, mRNA.	Hs.7012	SBNO1	12q24.31
6514379	A_23_P93737	dynein, cytoplasmic 1, intermediate chain 1 (DYNC1I1), transcript variant 1, mRNA.	Hs.440364	DYNC1I1	7q21.3-q22.1
6514514	A_24_P535784	Uncharacterized LOC441058	Hs.130535	MGC39584	4q35.2
6514571	A_24_P222454	periphilin 1 (PPHLN1), transcript variant 5, mRNA.	Hs.444157	PPHLN1	12q12
6514612	A_24_P920968	Gen endonuclease homolog 1 (Drosophila) (GEN1), transcript variant 1, mRNA.	Hs.467793	GEN1	2p24.2
6514768	A_23_P214839	male germ cell-associated kinase (MAK), transcript variant 3, mRNA.	Hs.446125	MAK	6p24
6514782	A_24_P334300	fibroblast growth factor 12 (FGF12), transcript variant 1, mRNA.	Hs.390250	FGF12	3q28
6514907	A_23_P141342	Rho GTPase activating protein 27 (ARHGAP27), transcript variant 1, mRNA.	Hs.205326	ARHGAP27	17q21.31
6514936	A_24_P889886	Chromosome 22 open reading frame 34	Hs.133159	C22orf34	22q13.33
6514940	A_23_P385084	Leucine zipper protein 1	Hs.257900	LUZP1	1p36
6514952	A_24_P93573	Uncharacterized gastric protein ZA32P	Hs.675123
6514992	A_32_P12994	uncharacterized LOC440900 (LOC440900), non-coding RNA.		LOC440900	2q14.1
6515003	A_32_P47361	Unknown
6515028	A_24_P919931	Prolactin regulatory element binding	Hs.279784	PREB	2p23.3
6515174	A_23_P339560	Zinc finger protein 75D	Hs.533540	ZNF75D	Xq26.3
6515215	A_24_P481844	Major histocompatibility complex, class II, DM beta	Hs.351279	HLA-DMB	6p21.3
6515217	A_24_P367439	HDCMB45P	Hs.632072
6515365	A_23_P140760	G protein-coupled receptor 97 (GPR97), mRNA.	Hs.383403	GPR97	16q21
6515381	A_32_P9191	Clone IMAGE:111510 mRNA sequence	Hs.655919
6515415	A_24_P320665	family with sequence similarity 126, member A (FAM126A), mRNA.	Hs.85603	FAM126A	7p15.3
6515489	A_32_P299	Platelet/endothelial cell adhesion molecule 1	Hs.376675	PECAM1	17q23.3
6515647	A_23_P311358	zinc finger protein 282 (ZNF282), mRNA.	Hs.729056	ZNF282	7q36.1
6515650	A_32_P227059	Unknown
6515692	A_24_P75220	membrane associated guanylate kinase, WW and PDZ domain containing 1 (MAGI1), transcript variant 1, mRNA.	Hs.476636	MAGI1	3p14.1
6515714	A_24_P475753	Rho guanine nucleotide exchange factor (GEF) 5 pseudogene	Hs.732659	LOC728377	7q35
6515746	A_23_P429555	neuropilin 2 (NRP2), transcript variant 5, mRNA.	Hs.471200	NRP2	2q33.3
6515930	A_32_P157213	CD177 molecule pseudogene 1		CD177P1
6515940	A_24_P410554	KIAA1659 protein		KIAA1659
6515953	A_24_P925124	Methyl-CpG binding domain protein 1	Hs.405610	MBD1	18q21
6515954	A_23_P200512	zinc finger protein 238 (ZNF238), transcript variant 1, mRNA.	Hs.69997	ZNF238	1q44-qter
6515996	A_24_P911788	Major histocompatibility complex, class II, DO beta	Hs.1802	HLA-DOB	6p21.3
6515997	A_23_P134139	fatty acid binding protein 7, brain (FABP7), mRNA.	Hs.26770	FABP7	6q22-q23
6516218	A_32_P74477	RNA binding motif, single stranded interacting protein 3 (RBMS3), transcript variant 3, mRNA.	Hs.221436	RBMS3	3p24-p23
6516233	A_24_P924010	Interferon induced transmembrane protein 3	Hs.374650	IFITM3	11p15.5
6516271	A_23_P205069	Human flt mRNA for receptor-related tyrosine kinase. [X51602]
6516272	A_24_P187826	zinc finger CCCH-type containing 12D (ZC3H12D), mRNA.	Hs.632618	ZC3H12D	6q25.1
6516296	A_24_P187993	engulfment and cell motility 2 (ELMO2), transcript variant 2, mRNA.	Hs.210469	ELMO2	20q13
6516333	A_24_P237896	Unknown
6516364	A_24_P96749	eukaryotic translation initiation factor 2C, 1 (EIF2C1), mRNA.	Hs.22867	EIF2C1	1p34.3
6516377	A_23_P75848	GTPase, very large interferon inducible pseudogene 1 (GVINP1), non-coding RNA.		GVINP1	11p15.4
6516436	A_24_P246262	plexin A4 (PLXNA4), transcript variant 1, mRNA.	Hs.511454	PLXNA4	7q32.3
6516540	A_24_P136379	HC6 (HC6)	Hs.661446		1
6516545	A_24_P261691	Histone cluster 4, H4	Hs.718935	HIST4H4	12p12.3
6516566	A_32_P110178	Q74MT0 (Q74MT0) NEQ259, partial (3%) [THC2352617]
6516579	A_32_P234853	Transcribed locus	Hs.604325
6516595	A_32_P133916	basonuclin 2 (BNC2), mRNA.	Hs.656581	BNC2	9p22.2
6516598	A_23_P29830	Cbl proto-oncogene, E3 ubiquitin protein ligase B (CBLB), mRNA.	Hs.430589	CBLB	3q13.11
6516685	A_24_P162532	Protein phosphatase, Mg2+/Mn2+ dependent, 1K	Hs.291000	PPM1K	4q22.1
6516690	A_23_P63083	ash1 (absent, small, or homeotic)-like (Drosophila) (ASH1L), mRNA.	Hs.491060	ASH1L	1q22
6516760	A_32_P505730	Major histocompatibility complex, class II, DP beta 2 (pseudogene)	Hs.665450	HLA-DPB2	6p21.3
6516776	A_23_P421483	carcinoembryonic antigen-related cell adhesion molecule 6 (non-specific cross reacting antigen) (CEACAM6), mRNA.	Hs.466814	CEACAM6	19q13.2
6516785	A_23_P23502	olfactory receptor, family 6, subfamily N, member 1 (OR6N1), mRNA.	Hs.553592	OR6N1	1q23.1
6516788	A_23_P141173	myeloperoxidase (MPO), nuclear gene encoding mitochondrial protein, mRNA.	Hs.458272	MPO	17q23.1
6516873	A_23_P431310	RAS guanyl releasing protein 4 (RASGRP4), transcript variant e, mRNA.	Hs.130434	RASGRP4	19q13.1
6516918	A_23_P212968	UDP glucuronosyltransferase 2 family, polypeptide B11 (UGT2B11), mRNA.	Hs.339811	UGT2B11	4q13.2
6517009	A_23_P329768	growth regulation by estrogen in breast cancer 1 (GREB1), transcript variant a, mRNA.	Hs.467733	GREB1	2p25.1
6517087	A_23_P215720	cystic fibrosis transmembrane conductance regulator (ATP-binding cassette sub-family C, member 7) (CFTR), mRNA.	Hs.489786	CFTR	7q31.2
6517133	A_32_P198282	Transcribed locus	Hs.687747
6517142	A_24_P945029	RAB11 family interacting protein 1 (class I)	Hs.191179	RAB11FIP1	8p11.22
6517152	A_23_P253958	leucine rich repeat containing 17 (LRRC17), transcript variant 2, mRNA.	Hs.567412	LRRC17	7q22.1
6517167	A_32_P860362	Translocase of inner mitochondrial membrane 23 homolog (yeast)	Hs.524308	TIMM23	10q11.23
6517205	A_32_P49832	centrosomal protein 85kDa-like (CEP85L), transcript variant 3, mRNA.	Hs.656959	CEP85L	6q22
6517248	A_24_P55295	gap junction protein, alpha 1, 43kDa (GJA1), mRNA.	Hs.74471	GJA1	6q21-q23.2
6517273	A_24_P289273	Retinal G protein coupled receptor	Hs.1544	RGR	10q23
6517279	A_32_P57247	Polypyrimidine tract binding protein 3	Hs.269988	PTBP3	9q32
6517376	A_23_P217643	coagulation factor VIII, procoagulant component (F8), transcript variant 2, mRNA.	Hs.654450	F8	Xq28
6517487	A_24_P926684	Ubiquitin-conjugating enzyme E2D 3	Hs.518773	UBE2D3	4q24
6517522	A_23_P204630	netrin 4 (NTN4), mRNA.	Hs.201034	NTN4	12q22
6517562	A_24_P765552	PREDICTED: LMNE6487 (LOC100128644), miscRNA.	Hs.729644	LOC100128644	3
6517568	A_32_P785717	Uncharacterized LOC100505915	Hs.678758	LOC100505915
6517585	A_24_P237912	family with sequence similarity 115, member C (FAM115C), transcript variant 3, mRNA.	Hs.740689	FAM115C	7q35
6517589	A_23_P130815	killer cell immunoglobulin-like receptor, two domains, short cytoplasmic tail, 2 (KIR2DS2), mRNA.	Hs.512572	KIR2DS2	19q13.4
6517683	A_23_P364428	calcium/calmodulin-dependent protein kinase IG (CAMK1G), mRNA.	Hs.199068	CAMK1G	1q32-q41
6517689	A_23_P359457	Dynein, axonemal, heavy chain 2	Hs.367649	DNAH2	17p13.1
6517715	A_23_P214168	collagen, type XII, alpha 1 (COL12A1), transcript variant long, mRNA.	Hs.101302	COL12A1	6q12-q13
6517757	A_32_P30271	arrestin domain containing 5 (ARRDC5), mRNA.	Hs.574574	ARRDC5	19p13.3
6517810	A_32_P834652	CDNA: FLJ23134 fis, clone LNG08567	Hs.734213
6517824	A_23_P108819	sideroflexin 5 (SFXN5), nuclear gene encoding mitochondrial protein, mRNA.	Hs.368171	SFXN5	2p13
6517874	A_32_P162443	Unknown
6517896	A_23_P250245	CD72 molecule (CD72), mRNA.	Hs.116481	CD72	9p13.3
6517909	A_32_P354945	PREDICTED: hypothetical LOC100505851 (LOC100505851), miscRNA.		LOC100505851	19
6518027	A_24_P375322	gamma-glutamyltransferase 8 pseudogene (GGT8P), non-coding RNA.		GGT8P	2p11.1
6518103	A_23_P259851	ADAM metallopeptidase with thrombospondin type 1 motif, 19	Hs.23751	ADAMTS19	5q23.3
6518163	A_23_P41304	glycophorin E (MNS blood group) (GYPE), transcript variant 1, mRNA.	Hs.728753	GYPE	4q31.1
6518177	A_32_P176956	RUN and FYVE domain containing 3	Hs.718875	RUFY3	4q13.3
6518257	A_24_P289709	Hemoglobin, gamma G	Hs.302145	HBG2	11p15.5
6518264	A_24_P825874	POTE ankyrin domain family, member F (POTEF), mRNA.	Hs.580547	POTEF	2q21.1
6518378	A_24_P289954	retrotransposon gag domain containing 4 (RGAG4), mRNA.	Hs.512180	RGAG4	Xq13.1
6518389	A_24_P254789	collagen, type XIV, alpha 1 (COL14A1), mRNA.	Hs.409662	COL14A1	8q23
6518603	A_24_P78556	Ras association (RalGDS/AF-6) domain family (N-terminal) member 8 (RASSF8), transcript variant 3, mRNA.	Hs.696433	RASSF8	12p12.3
6518653	A_32_P65473	KIAA1244 (KIAA1244), mRNA.	Hs.194408	KIAA1244	6q23.3
6585821	A_32_P180668	WD repeat domain 59	Hs.280951	WDR59	16q23.1
6585861	A_23_P215331	corticotropin releasing hormone receptor 2 (CRHR2), transcript variant 3, mRNA.	Hs.546246	CRHR2	7p14.3
6585917	A_23_P37127	forkhead box A1 (FOXA1), mRNA.	Hs.163484	FOXA1	14q12-q13
6585962	A_24_P25247	Uncharacterized LOC100131232	Hs.638545	LOC100131232	11q13.1
6585983	A_23_P1331	collagen, type XIII, alpha 1 (COL13A1), transcript variant 21, mRNA.	Hs.695934	COL13A1	10q22
6586209	A_23_P1331	collagen, type XIII, alpha 1 (COL13A1), transcript variant 21, mRNA.	Hs.695934	COL13A1	10q22
6586579	A_23_P1331	collagen, type XIII, alpha 1 (COL13A1), transcript variant 21, mRNA.	Hs.695934	COL13A1	10q22
6586633	A_23_P1331	collagen, type XIII, alpha 1 (COL13A1), transcript variant 21, mRNA.	Hs.695934	COL13A1	10q22
6586669	A_23_P37127	forkhead box A1 (FOXA1), mRNA.	Hs.163484	FOXA1	14q12-q13
6586672	A_23_P1331	collagen, type XIII, alpha 1 (COL13A1), transcript variant 21, mRNA.	Hs.695934	COL13A1	10q22
6587061	A_23_P37127	forkhead box A1 (FOXA1), mRNA.	Hs.163484	FOXA1	14q12-q13
6587181	A_23_P37127	forkhead box A1 (FOXA1), mRNA.	Hs.163484	FOXA1	14q12-q13
6587224	A_23_P1331	collagen, type XIII, alpha 1 (COL13A1), transcript variant 21, mRNA.	Hs.695934	COL13A1	10q22
6587614	A_23_P87238	SAA2-SAA4 readthrough (SAA2-SAA4), mRNA.	Hs.731376	SAA2-SAA4	11p15.1

## Sheet: Module 2
mAdb ID	Clone	Description	UniGene	Gene	Map
6474669	A_24_P935667	Full length insert cDNA clone ZD55G10	Hs.636486
6474679	A_23_P206707	metallothionein 1G (MT1G), mRNA.	Hs.433391	MT1G	16q13
6474756	A_24_P933458	Neuron navigator 2	Hs.502116	NAV2	11p15.1
6474949	A_23_P120572	Ras and Rab interactor 2 (RIN2), transcript variant 2, mRNA.	Hs.472270	RIN2	20p11.22
6475228	A_24_P70480	carcinoembryonic antigen-related cell adhesion molecule 4 (CEACAM4), mRNA.	Hs.12	CEACAM4	19q13.2
6475267	A_32_P231179	tektin 4 (TEKT4), mRNA.	Hs.631517	TEKT4	2q11.1
6475287	A_23_P3956	C1q and tumor necrosis factor related protein 1 (C1QTNF1), transcript variant 2, mRNA.	Hs.201398	C1QTNF1	17q25.3
6475322	A_23_P126735	interleukin 10 (IL10), mRNA.	Hs.193717	IL10	1q31-q32
6475496	A_23_P164784	leukocyte immunoglobulin-like receptor, subfamily B (with TM and ITIM domains), member 5 (LILRB5), transcript variant 3, mRNA.	Hs.655338	LILRB5	19q13.4
6475596	A_23_P163782	metallothionein 1H (MT1H), mRNA.	Hs.438462	MT1H	16q13
6475748	A_23_P303242	metallothionein 1X (MT1X), mRNA.	Hs.374950	MT1X	16q13
6475775	A_23_P72117	sphingomyelin phosphodiesterase, acid-like 3A (SMPDL3A), mRNA.	Hs.486357	SMPDL3A	6q22.31
6475857	A_23_P213615	ADAM metallopeptidase with thrombospondin type 1 motif, 2 (ADAMTS2), transcript variant 1, mRNA.	Hs.23871	ADAMTS2	5qter
6476277	A_24_P115762	cathepsin C (CTSC), transcript variant 3, mRNA.	Hs.128065	CTSC	11q14.2
6476323	A_23_P393856	Kin of IRRE like 3 (Drosophila)	Hs.376015	KIRREL3	11q24
6476428	A_23_P24903	purinergic receptor P2Y, G-protein coupled, 2 (P2RY2), transcript variant 3, mRNA.	Hs.339	P2RY2	11q13.5-q14.1
6476517	A_23_P209135	leukocyte-associated immunoglobulin-like receptor 1 (LAIR1), transcript variant b, mRNA.	Hs.572535	LAIR1	19q13.4
6476697	A_23_P126298	Fc fragment of IgG, low affinity IIIa, receptor (CD16a) (FCGR3A), transcript variant 5, mRNA.	Hs.372679	FCGR3A	1q23
6476783	A_24_P12573	chemokine (C-C motif) ligand 26 (CCL26), mRNA.	Hs.131342	CCL26	7q11.23
6476876	A_24_P324314	matrix-remodelling associated 7 (MXRA7), transcript variant 2, mRNA.	Hs.250723	MXRA7	17q25.1
6476900	A_23_P329452	1-acylglycerol-3-phosphate O-acyltransferase 4 (lysophosphatidic acid acyltransferase, delta)	Hs.353175	AGPAT4	6q26
6477115	A_23_P321307	ADAM metallopeptidase with thrombospondin type 1 motif, 2 (ADAMTS2), transcript variant 1, mRNA.	Hs.23871	ADAMTS2	5qter
6477185	A_23_P71480	defensin, beta 1 (DEFB1), mRNA.	Hs.32949	DEFB1	8p23.1
6477296	A_23_P502879	lysophosphatidic acid receptor 1 (LPAR1), transcript variant 1, mRNA.	Hs.126667	LPAR1	9q31.3
6477362	A_23_P48596	ribonuclease, RNase A family, 1 (pancreatic) (RNASE1), transcript variant 4, mRNA.	Hs.78224	RNASE1	14q11.2
6477376	A_24_P321184	cathepsin L1 pseudogene 2 (CTSL1P2), non-coding RNA.		CTSL1P2	10q11.22
6477384	A_23_P56734	histamine N-methyltransferase (HNMT), transcript variant 1, mRNA.	Hs.42151	HNMT	2q22.1
6477469	A_23_P212665	ATP-binding cassette, sub-family C (CFTR/MRP), member 5 (ABCC5), transcript variant 1, mRNA.	Hs.728765	ABCC5	3q27
6477908	A_23_P216176	macrophage scavenger receptor 1 (MSR1), transcript variant SR-AIII, mRNA.	Hs.147635	MSR1	8p22
6477974	A_32_P35452	Transcribed locus	Hs.668532
6478193	A_23_P69941	uncharacterized FLJ11235 (FLJ11235), non-coding RNA.		FLJ11235	5q22.2
6478428	A_32_P56001	CD93 molecule (CD93), mRNA.	Hs.97199	CD93	20p11.21
6478473	A_24_P923654	Thioredoxin-related transmembrane protein 4	Hs.169358	TMX4	20p12
6478550	A_32_P55840	Transcribed locus, strongly similar to XP_001140796.1 PREDICTED: putative uncharacterized protein C6orf100-like [Pan troglodytes]	Hs.453549		6
6478578	A_24_P859859	S100 calcium binding protein A8	Hs.416073	S100A8	1q21
6479207	A_23_P74001	S100 calcium binding protein A12 (S100A12), mRNA.	Hs.19413	S100A12	1q21
6479352	A_23_P133293	multiple C2 domains, transmembrane 1 (MCTP1), transcript variant S, mRNA.	Hs.655087	MCTP1	5q15
6479647	A_32_P87145	EH-domain containing 1	Hs.523774	EHD1	11q13
6479796	A_23_P49448	fatty acid 2-hydroxylase (FA2H), mRNA.	Hs.461329	FA2H	16q23
6479842	A_23_P1552	cathepsin C (CTSC), transcript variant 1, mRNA.	Hs.128065	CTSC	11q14.2
6479909	A_23_P203558	hemoglobin, beta (HBB), mRNA.	Hs.523443	HBB	11p15.5
6480053	A_32_P74942	Fc fragment of IgG, low affinity IIa, receptor (CD32)	Hs.352642	FCGR2A	1q23
6480538	A_23_P106322	cytoplasmic polyadenylation element binding protein 1 (CPEB1), transcript variant 4, mRNA.	Hs.547988	CPEB1	15q25.2
6481103	A_32_P107717	PREDICTED: hypothetical LOC100506048, transcript variant 2 (LOC100506048), miscRNA.		LOC100506048	4
6481113	A_23_P110531	follistatin (FST), transcript variant FST317, mRNA.	Hs.9914	FST	5q11.2
6481120	A_23_P4551	SET binding protein 1 (SETBP1), transcript variant 1, mRNA.	Hs.435458	SETBP1	18q21.1
6481124	A_24_P185516	Transcribed locus	Hs.631534
6481128	A_23_P217049	neuronal calcium sensor 1 (NCS1), transcript variant 2, mRNA.	Hs.642946	NCS1	9q34
6481243	A_24_P389251	cytochrome P450, family 3, subfamily A, polypeptide 4 (CYP3A4), transcript variant 2, mRNA.	Hs.728751	CYP3A4	7q21.1
6481267	A_23_P256107	heparanase (HPSE), transcript variant 4, mRNA.	Hs.44227	HPSE	4q21.3
6481300	A_23_P31188	GTPase, IMAP family member 1 (GIMAP1), mRNA.	Hs.647079	GIMAP1	7q36.1
6481400	A_32_P210525	Solute carrier family 39 (zinc transporter), member 8	Hs.288034	SLC39A8	4q22-q24
6481440	A_23_P422933	Rho GTPase activating protein 20 (ARHGAP20), transcript variant 5, mRNA.		ARHGAP20	11q23.1
6481462	A_23_P310410	CD1e molecule (CD1E), transcript variant 9, mRNA.	Hs.249217	CD1E	1q22-q23
6481780	A_23_P47709	folate receptor 2 (fetal) (FOLR2), transcript variant 4, mRNA.	Hs.433159	FOLR2	11q13.3-q13.5
6482119	A_23_P427703	metallothionein 1L (gene/pseudogene) (MT1L), non-coding RNA.		MT1L	16q13
6482223	A_24_P937159	Kruppel-like factor 8 (KLF8), transcript variant 1, mRNA.	Hs.646614	KLF8	Xp11.21
6482542	A_23_P129064	glycine amidinotransferase (L-arginine:glycine amidinotransferase) (GATM), nuclear gene encoding mitochondrial protein, mRNA.	Hs.75335	GATM	15q21.1
6482570	A_32_P180825	formin 1 (FMN1), mRNA.	Hs.657649	FMN1	15q13.3
6482573	A_23_P105465	chemokine-like receptor 1 (CMKLR1), transcript variant 4, mRNA.	Hs.197143	CMKLR1	12q24.1
6482612	A_23_P54267	secretogranin III (SCG3), transcript variant 1, mRNA.	Hs.232618	SCG3	15q21
6482716	A_23_P354805	Kruppel-like factor 12 (KLF12), mRNA.	Hs.373857	KLF12	13q22
6482810	A_23_P85716	Fc fragment of IgG, low affinity IIa, receptor (CD32) (FCGR2A), transcript variant 2, mRNA.	Hs.352642	FCGR2A	1q23
6482894	A_32_P74409	chromosome 11 open reading frame 96 (C11orf96), mRNA.	Hs.530443	C11orf96	11p11.2
6483049	A_23_P3014	ribonuclease, RNase A family, k6 (RNASE6), mRNA.	Hs.23262	RNASE6	14q11.2
6483498	A_23_P104996	bestrophin 1 (BEST1), transcript variant 1, mRNA.	Hs.712676	BEST1	11q13
6483691	A_24_P221551	Uncharacterized LOC100129113	Hs.677516	LOC100129113	22q11.21
6483754	A_23_P502158	ADAM metallopeptidase domain 11 (ADAM11), mRNA.	Hs.6088	ADAM11	17q21.3
6483910	A_23_P33723	CD163 molecule (CD163), transcript variant 1, mRNA.	Hs.504641	CD163	12p13.3
6483927	A_23_P64721	hydroxycarboxylic acid receptor 3 (HCAR3), mRNA.	Hs.458425	HCAR3	12q24.31
6484092	A_24_P235988	C-type lectin domain family 7, member A	Hs.143929	CLEC7A	12p13.2
6484237	A_23_P163787	matrix metallopeptidase 2 (gelatinase A, 72kDa gelatinase, 72kDa type IV collagenase) (MMP2), transcript variant 2, mRNA.	Hs.513617	MMP2	16q13-q21
6484473	A_23_P210210	endothelial PAS domain protein 1 (EPAS1), mRNA.	Hs.468410	EPAS1	2p21-p16
6484687	A_32_P219581	CDNA clone IMAGE:5311842	Hs.238964		2
6484965	A_24_P11384	ERBB receptor feedback inhibitor 1 (ERRFI1), mRNA.	Hs.605445	ERRFI1	1p36
6485099	A_23_P24104	plasminogen activator, urokinase (PLAU), transcript variant 1, mRNA.	Hs.77274	PLAU	10q24
6485685	A_23_P339588	T-cell activation RhoGTPase activating protein (TAGAP), transcript variant 3, mRNA.	Hs.529984	TAGAP	6q25.3
6485759	A_24_P125096	metallothionein 1X (MT1X), mRNA.	Hs.374950	MT1X	16q13
6485769	A_24_P372223	macrophage scavenger receptor 1 (MSR1), transcript variant SR-AI, mRNA.	Hs.147635	MSR1	8p22
6486448	A_23_P304897	bradykinin receptor B2 (BDKRB2), mRNA.	Hs.726620	BDKRB2	14q32.1-q32.2
6486545	A_23_P116414	phospholipase A2, group XVI (PLA2G16), transcript variant 2, mRNA.	Hs.502775	PLA2G16	11q12.3
6486864	A_23_P62115	TIMP metallopeptidase inhibitor 1 (TIMP1), mRNA.	Hs.522632	TIMP1	Xp11.3-p11.23
6486955	A_23_P124619	S100 calcium binding protein A14 (S100A14), mRNA.	Hs.288998	S100A14	1q21.3
6487534	A_24_P359231	histone cluster 1, H2bj		HIST1H2BJ
6487805	A_23_P414343	metallothionein 1J, pseudogene (MT1JP), non-coding RNA.		MT1JP	16q13
6488015	A_23_P74887	syndecan 3 (SDC3), mRNA.	Hs.158287	SDC3	1pter-p22.3
6488119	A_23_P55682	zinc finger and SCAN domain containing 18 (ZSCAN18), transcript variant 1, mRNA.	Hs.235390	ZSCAN18	19q13.43
6488267	A_24_P243749	pyruvate dehydrogenase kinase, isozyme 4 (PDK4), nuclear gene encoding mitochondrial protein, mRNA.	Hs.8364	PDK4	7q21.3
6488328	A_23_P103256	complement factor H-related 3 (CFHR3), transcript variant 1, mRNA.	Hs.709217	CFHR3	1q32
6488354	A_24_P75190	hemoglobin, delta (HBD), mRNA.	Hs.699280	HBD	11p15.5
6488468	A_23_P150768	solute carrier organic anion transporter family, member 2B1 (SLCO2B1), transcript variant 2, mRNA.	Hs.7884	SLCO2B1	11q13
6488497	A_23_P41424	solute carrier family 39 (zinc transporter), member 8 (SLC39A8), transcript variant 1, mRNA.	Hs.288034	SLC39A8	4q22-q24
6488924	A_23_P201138	potassium voltage-gated channel, shaker-related subfamily, member 3 (KCNA3), mRNA.	Hs.169948	KCNA3	1p13.3
6489331	A_23_P55020	CD300 molecule-like family member f (CD300LF), mRNA.	Hs.567706	CD300LF	17q25.1
6489759	A_23_P206718	metallothionein 1X (MT1X), mRNA.	Hs.374950	MT1X	16q13
6489990	A_23_P83579	aryl-hydrocarbon receptor nuclear translocator 2 (ARNT2), mRNA.	Hs.459070	ARNT2	15q24
6490063	A_32_P111336	PREDICTED: hypothetical LOC100131283, transcript variant 1 (LOC100131283), miscRNA.		LOC100131283	6
6490105	A_23_P53763	KIAA0226-like (KIAA0226L), mRNA.	Hs.98117	KIAA0226L	13q14.13
6490204	A_24_P685241	Transcribed locus	Hs.696660
6490483	A_23_P121596	pro-platelet basic protein (chemokine (C-X-C motif) ligand 7) (PPBP), mRNA.	Hs.2164	PPBP	4q12-q13
6490560	A_24_P348265	Fc fragment of IgA, receptor for (FCAR), transcript variant 4, mRNA.	Hs.659872	FCAR	19q13.42
6490721	A_24_P283189	CD14 molecule (CD14), transcript variant 4, mRNA.	Hs.163867	CD14	5q31.1
6491072	A_23_P25706	calmin (calponin-like, transmembrane) (CLMN), mRNA.	Hs.301478	CLMN	14q32.13
6491080	A_23_P54840	metallothionein 1A (MT1A), mRNA.	Hs.655199	MT1A	16q13
6491205	A_32_P213103	Transcribed locus	Hs.718733
6491432	A_24_P96505	GDNF family receptor alpha 2 (GFRA2), transcript variant 3, mRNA.	Hs.441202	GFRA2	8p21.3
6491561	A_32_P93403	Cathepsin C	Hs.128065	CTSC	11q14.2
6491785	A_23_P8801	cytochrome P450, family 3, subfamily A, polypeptide 5 (CYP3A5), transcript variant 1, mRNA.	Hs.571258	CYP3A5	7q21.1
6491930	A_23_P75310	Rho GTPase activating protein 22 (ARHGAP22), transcript variant 3, mRNA.	Hs.655672	ARHGAP22	10q11.22
6492035	A_24_P66027	apolipoprotein B mRNA editing enzyme, catalytic polypeptide-like 3B (APOBEC3B), transcript variant 2, mRNA.		APOBEC3B	22q13.1-q13.2
6492067	A_23_P133216	neurolysin (metallopeptidase M3 family) (NLN), nuclear gene encoding mitochondrial protein, mRNA.	Hs.247460	NLN	5q12.3
6492128	A_24_P225845	CDNA: FLJ23006 fis, clone LNG00414	Hs.79881		3
6492225	A_23_P500998	homeobox A9 (HOXA9), mRNA.	Hs.659350	HOXA9	7p15.2
6492365	A_23_P143102	hypothetical protein MGC10955		MGC10955
6492559	A_24_P382187	insulin-like growth factor binding protein 4 (IGFBP4), mRNA.	Hs.462998	IGFBP4	17q12-q21.1
6492609	A_23_P130515	carcinoembryonic antigen-related cell adhesion molecule 3 (CEACAM3), mRNA.	Hs.11	CEACAM3	19q13.2
6493285	A_23_P397391	free fatty acid receptor 2 (FFAR2), mRNA.	Hs.248056	FFAR2	19q13.1
6493301	A_23_P406385	F-box and leucine-rich repeat protein 16 (FBXL16), mRNA.	Hs.513244	FBXL16	16p13.3
6493380	A_23_P203933	inositol 1,4,5-trisphosphate receptor, type 2 (ITPR2), mRNA.	Hs.512235	ITPR2	12p11
6493430	A_23_P410115	ENTH domain containing 1 (ENTHD1), mRNA.	Hs.474869	ENTHD1	22q13.1
6493544	A_23_P434809	S100 calcium binding protein A8 (S100A8), mRNA.	Hs.416073	S100A8	1q21
6493590	A_24_P348806	pleckstrin homology domain containing, family A member 7 (PLEKHA7), mRNA.	Hs.12332	PLEKHA7	11p15.1
6494061	A_32_P165504	Transcribed locus	Hs.602901		8
6494121	A_23_P336612	chromosome 15 open reading frame 26 (C15orf26), mRNA.	Hs.130979	C15orf26	15q25.1
6494579	A_23_P353014	calcium channel, voltage-dependent, alpha 2/delta subunit 4 (CACNA2D4), mRNA.	Hs.13768	CACNA2D4	12p13.33
6494722	A_32_P176911	long intergenic non-protein coding RNA 239 (LINC00239), non-coding RNA.		LINC00239	14q32.31
6494907	A_23_P51105	cysteine rich transmembrane BMP regulator 1 (chordin-like) (CRIM1), mRNA.	Hs.699247	CRIM1	2p21
6494979	A_32_P157504	CDNA FLJ37310 fis, clone BRAMY2016706	Hs.594896		6
6495131	A_32_P74763	Transcribed locus	Hs.661327
6496091	A_23_P40295	lysosomal-associated membrane protein family, member 5 (LAMP5), transcript variant 1, mRNA.	Hs.22920	LAMP5	20p12
6496096	A_23_P93787	hepatocyte growth factor (hepapoietin A; scatter factor) (HGF), transcript variant 1, mRNA.	Hs.396530	HGF	7q21.1
6496395	A_23_P88678	chromosome 15 open reading frame 27 (C15orf27), mRNA.	Hs.661411	C15orf27	15q24.2
6496427	A_24_P401090	Unknown
6496433	A_23_P60933	metallothionein 1G (MT1G), mRNA.	Hs.433391	MT1G	16q13
6496469	A_23_P14432	fucosyltransferase 8 (alpha (1,6) fucosyltransferase) (FUT8), transcript variant 1, mRNA.	Hs.597649	FUT8	14q24.3
6496647	A_23_P252413	Metallothionein 2A	Hs.647371	MT2A	16q13
6496925	A_23_P168388	GTPase, IMAP family member 8 (GIMAP8), mRNA.	Hs.647121	GIMAP8	7q36.1
6497200	A_32_P12504	Chromosome 11 open reading frame 96	Hs.530443	C11orf96	11p11.2
6497261	A_23_P203376	membrane-spanning 4-domains, subfamily A, member 6A (MS4A6A), transcript variant 1, mRNA.	Hs.523702	MS4A6A	11q12.1
6497274	A_24_P362805	glycerol kinase 5 (putative) (GK5), transcript variant 2, non-coding RNA.		GK5	3q23
6497414	A_23_P313632	fucosyltransferase 8 (alpha (1,6) fucosyltransferase) (FUT8), transcript variant 1, mRNA.	Hs.597649	FUT8	14q24.3
6497800	A_23_P215484	chemokine (C-C motif) ligand 26 (CCL26), mRNA.	Hs.131342	CCL26	7q11.23
6498461	A_32_P100365	ERBB receptor feedback inhibitor 1	Hs.605445	ERRFI1	1p36
6498582	A_23_P12082	chitinase 3-like 2 (CHI3L2), transcript variant 2, mRNA.	Hs.514840	CHI3L2	1p13.3
6498663	A_23_P364580	dedicator of cytokinesis 4 (DOCK4), mRNA.	Hs.654652	DOCK4	7q31.1
6498810	A_23_P37983	metallothionein 1B (MT1B), mRNA.	Hs.656629	MT1B	16q13
6498828	A_23_P206120	formin 1 (FMN1), mRNA.	Hs.657649	FMN1	15q13.3
6499390	A_23_P15174	metallothionein 1F (MT1F), mRNA.	Hs.513626	MT1F	16q13
6499443	A_23_P113351	SPARC-like 1 (hevin) (SPARCL1), transcript variant 1, mRNA.	Hs.62886	SPARCL1	4q22.1
6499509	A_32_P167471	calmin (calponin-like, transmembrane) (CLMN), mRNA.	Hs.301478	CLMN	14q32.13
6499800	A_24_P324886	dedicator of cytokinesis 4 (DOCK4), mRNA.	Hs.654652	DOCK4	7q31.1
6500018	A_23_P7719	Unknown
6500166	A_23_P30163	uncharacterized FLJ13197 (FLJ13197), non-coding RNA.		FLJ13197	4p14
6500204	A_23_P381431	N-acetylneuraminate pyruvate lyase (dihydrodipicolinate synthase) (NPL), transcript variant 5, mRNA.	Hs.496969	NPL	1q25
6500209	A_24_P298179	Unknown
6500528	A_23_P75769	membrane-spanning 4-domains, subfamily A, member 4A (MS4A4A), transcript variant 1, mRNA.	Hs.325960	MS4A4A	11q12
6500652	A_23_P216649	ATP-binding cassette, sub-family A (ABC1), member 1 (ABCA1), mRNA.	Hs.659274	ABCA1	9q31.1
6501323	A_23_P309739	estrogen receptor 1 (ESR1), transcript variant 4, mRNA.	Hs.208124	ESR1	6q25.1
6501355	A_23_P105461	chemokine-like receptor 1 (CMKLR1), transcript variant 2, mRNA.	Hs.197143	CMKLR1	12q24.1
6501540	A_23_P110135	WD repeat domain 19 (WDR19), mRNA.	Hs.438482	WDR19	4p14
6501616	A_23_P121657	heparan sulfate (glucosamine) 3-O-sulfotransferase 1 (HS3ST1), mRNA.	Hs.507348	HS3ST1	4p16
6501929	A_23_P2640	C-type lectin domain family 7, member A (CLEC7A), transcript variant 5, mRNA.	Hs.143929	CLEC7A	12p13.2
6501955	A_23_P88559	lipase, hepatic (LIPC), mRNA.	Hs.654472	LIPC	15q21-q23
6501960	A_32_P112452	PREDICTED: hypothetical LOC100652944 (LOC100652944), miscRNA.		LOC100652944	1
6501984	A_23_P204947	gap junction protein, beta 2, 26kDa (GJB2), mRNA.	Hs.524894	GJB2	13q11-q12
6502166	A_23_P103756	oviductal glycoprotein 1, 120kDa (OVGP1), mRNA.	Hs.1154	OVGP1	1p13
6502188	A_23_P67799	transmembrane protein 37 (TMEM37), mRNA.	Hs.26216	TMEM37	2q14.2
6502388	A_24_P74828	metallothionein 1J, pseudogene (MT1JP), non-coding RNA.		MT1JP	16q13
6502438	A_32_P59302	human immunodeficiency virus type I enhancer binding protein 3 (HIVEP3), transcript variant 1, mRNA.	Hs.403972	HIVEP3	1p34
6502720	A_32_P35839	PREDICTED: hypothetical LOC100506670 (LOC100506670), miscRNA.		LOC100506670	16
6502791	A_23_P7827	family with sequence similarity 26, member F (FAM26F), mRNA.	Hs.381220	FAM26F	6q22.1
6502819	A_23_P218369	chemokine (C-C motif) ligand 14 (CCL14), transcript variant 3, mRNA.	Hs.740501	CCL14	17q11.2
6503114	A_24_P308051	dynein, axonemal, heavy chain 8 (DNAH8), mRNA.	Hs.520106	DNAH8	6p21.2
6503454	A_23_P32500	stabilin 1 (STAB1), mRNA.	Hs.301989	STAB1	3p21.1
6503755	A_23_P114740	complement factor H-related 1 (CFHR1), mRNA.	Hs.575869	CFHR1	1q32
6503829	A_24_P117029	low density lipoprotein receptor (LDLR), transcript variant 3, mRNA.	Hs.213289	LDLR	19p13.2
6503884	A_24_P248345	olfactomedin-like 2B (OLFML2B), mRNA.	Hs.507515	OLFML2B	1q23.3
6504220	A_23_P382835	purinergic receptor P2Y, G-protein coupled, 1 (P2RY1), mRNA.	Hs.654526	P2RY1	3q25.2
6504260	A_23_P210811	CD93 molecule	Hs.97199	CD93	20p11.21
6504298	A_23_P80902	kinesin family member 15 (KIF15), mRNA.	Hs.658939	KIF15	3p21.31
6504516	A_32_P177955	uncharacterized LOC441461 (LOC441461), non-coding RNA.		LOC441461	9q31.1
6504667	A_24_P281101	c-abl oncogene 1, non-receptor tyrosine kinase (ABL1), transcript variant b, mRNA.	Hs.431048	ABL1	9q34.1
6504719	A_23_P430068	podoplanin (PDPN), transcript variant 2, mRNA.	Hs.468675	PDPN	1p36.21
6504777	A_23_P17345	v-maf musculoaponeurotic fibrosarcoma oncogene homolog B (avian) (MAFB), mRNA.	Hs.169487	MAFB	20q11.2-q13.1
6504832	A_23_P39356	free fatty acid receptor 1 (FFAR1), mRNA.	Hs.248127	FFAR1	19q13.1
6504846	A_23_P158318	receptor tyrosine kinase-like orphan receptor 2 (ROR2), mRNA.	Hs.98255	ROR2	9q22
6504932	A_32_P156628	Glutamate-ammonia ligase	Hs.518525	GLUL	1q31
6505010	A_23_P145724	protein phosphatase 1, regulatory subunit 17 (PPP1R17), transcript variant 1, mRNA.	Hs.227011	PPP1R17	7p15
6505093	A_23_P76364	CD9 molecule (CD9), mRNA.	Hs.114286	CD9	12p13.3
6505150	A_23_P78595	carcinoembryonic antigen-related cell adhesion molecule 21 (CEACAM21), transcript variant 2, mRNA.	Hs.655885	CEACAM21	19q13.2
6505173	A_23_P83098	aldehyde dehydrogenase 1 family, member A1 (ALDH1A1), mRNA.	Hs.76392	ALDH1A1	9q21.13
6505222	A_23_P91390	thrombomodulin (THBD), mRNA.	Hs.2030	THBD	20p11.2
6505399	A_32_P66035	transmembrane protein 86A (TMEM86A), mRNA.	Hs.502100	TMEM86A	11p15.1
6505823	A_32_P437735	uncharacterized LOC256021 (LOC256021), transcript variant 1, mRNA.	Hs.651357	LOC256021	12q21.33
6505936	A_32_P104063	colorectal neoplasia differentially expressed (non-protein coding) (CRNDE), transcript variant 1, non-coding RNA.		CRNDE	16q12.2
6506435	A_23_P84084	GDNF family receptor alpha 2 (GFRA2), transcript variant 1, mRNA.	Hs.441202	GFRA2	8p21.3
6506647	A_24_P162211	lanosterol synthase (2,3-oxidosqualene-lanosterol cyclase) (LSS), transcript variant 2, mRNA.	Hs.596543	LSS	21q22.3
6506683	A_23_P6849	chemokine (C-C motif) receptor 1 (CCR1), mRNA.	Hs.301921	CCR1	3p21
6506691	A_32_P92840	Complement component 1, q subcomponent, A chain	Hs.632379	C1QA	1p36.12
6506855	A_24_P55391	huntingtin interacting protein 1 (HIP1), transcript variant 1, mRNA.	Hs.329266	HIP1	7q11.23
6507214	A_23_P344568	family with sequence similarity 124A (FAM124A), transcript variant 1, mRNA.	Hs.737490	FAM124A	13q14.3
6507289	A_32_P68142	Cysteine-rich secretory protein LCCL domain containing 2	Hs.513779	CRISPLD2	16q24.1
6507756	A_32_P52488	Peripheral myelin protein 22	Hs.372031	PMP22	17p12
6507798	A_23_P208595	low density lipoprotein receptor (LDLR), transcript variant 3, mRNA.	Hs.213289	LDLR	19p13.2
6507840	A_24_P344961	angiomotin (AMOT), transcript variant 1, mRNA.	Hs.528051	AMOT	Xq23
6507882	A_32_P135890	Transcribed locus, strongly similar to XP_001091406.1 PREDICTED: ribosyldihydronicotinamide dehydrogenase [quinone]-like isoform 2 [Macaca mulatta]	Hs.710021		6
6508039	A_23_P76488	epithelial membrane protein 1 (EMP1), mRNA.	Hs.719042	EMP1	12p12.3
6508097	A_24_P82106	matrix metallopeptidase 14 (membrane-inserted) (MMP14), mRNA.	Hs.2399	MMP14	14q11-q12
6508327	A_23_P253791	cathelicidin antimicrobial peptide (CAMP), mRNA.	Hs.51120	CAMP	3p21.3
6508961	A_23_P64611	pyrimidinergic receptor P2Y, G-protein coupled, 6 (P2RY6), transcript variant 1, mRNA.	Hs.16362	P2RY6	11q13.5
6509063	A_23_P205500	Unknown
6509122	A_32_P116303	Unknown
6509317	A_24_P183128	placenta-specific 8 (PLAC8), transcript variant 2, mRNA.	Hs.546392	PLAC8	4q21.22
6509577	A_32_P115518	Transcribed locus	Hs.718733
6509621	A_23_P359245	met proto-oncogene (hepatocyte growth factor receptor) (MET), transcript variant 2, mRNA.	Hs.132966	MET	7q31
6509733	A_23_P358917	cytochrome P450, family 3, subfamily A, polypeptide 7 (CYP3A7), mRNA.	Hs.111944	CYP3A7	7q21-q22.1
6510081	A_23_P36120	membrane-spanning 4-domains, subfamily A, member 6A (MS4A6A), transcript variant 4, mRNA.	Hs.523702	MS4A6A	11q12.1
6510249	A_23_P218646	tumor necrosis factor receptor superfamily, member 6b, decoy (TNFRSF6B), mRNA.	Hs.434878	TNFRSF6B	20q13.3
6510453	A_32_P132300	Membrane-spanning 4-domains, subfamily A, member 6A	Hs.523702	MS4A6A	11q12.1
6510644	A_23_P48029	C-type lectin domain family 4, member A (CLEC4A), transcript variant 4, mRNA.	Hs.504657	CLEC4A	12p13
6510699	A_23_P106844	metallothionein 2A (MT2A), mRNA.	Hs.647371	MT2A	16q13
6510837	A_23_P80040	protein C receptor, endothelial (PROCR), mRNA.	Hs.647450	PROCR	20q11.2
6510940	A_23_P156327	transforming growth factor, beta-induced, 68kDa (TGFBI), mRNA.	Hs.369397	TGFBI	5q31
6510941	A_24_P920388	Transcribed locus	Hs.42964		12
6511093	A_24_P361896	metallothionein 2A (MT2A), mRNA.	Hs.647371	MT2A	16q13
6511186	A_23_P145096	phospholipase A2, group VII (platelet-activating factor acetylhydrolase, plasma) (PLA2G7), transcript variant 2, mRNA.	Hs.584823	PLA2G7	6p21.2-p12
6511492	A_23_P376449	Transcribed locus, moderately similar to XP_002803218.1 PREDICTED: putative cathepsin L-like protein 6-like [Macaca mulatta]	Hs.535089
6511996	A_23_P11017	Homo sapiens cDNA FLJ11804 fis, clone HEMBA1006272, moderately similar to RETROVIRUS-RELATED PROTEASE (EC 3.4.23.-). [AK021866]
6512007	A_23_P23048	S100 calcium binding protein A9 (S100A9), mRNA.	Hs.112405	S100A9	1q21
6512299	A_24_P610405	PREDICTED: hypothetical LOC100652886 (LOC100652886), miscRNA.		LOC100652886	5
6512900	A_24_P111996	hemochromatosis (HFE), transcript variant 9, mRNA.	Hs.233325	HFE	6p21.3
6513058	A_23_P85240	toll-like receptor 7 (TLR7), mRNA.	Hs.659215	TLR7	Xp22.3
6513180	A_23_P303058	complement component 5a receptor 1 (C5AR1), mRNA.	Hs.2161	C5AR1	19q13.3-q13.4
6513463	A_24_P210569	secretogranin III (SCG3), transcript variant 2, mRNA.	Hs.232618	SCG3	15q21
6513890	A_23_P206724	metallothionein 1E (MT1E), mRNA.	Hs.534330	MT1E	16q13
6514046	A_32_P48156	Transcribed locus	Hs.674021
6514373	A_24_P911663	coiled-coil domain containing 88C (CCDC88C), mRNA.	Hs.525536	CCDC88C	14q32.11
6514480	A_32_P117503	ST3GAL6 antisense RNA 1 (non-protein coding) (ST3GAL6-AS1), non-coding RNA.		ST3GAL6-AS1	3
6514683	A_23_P66241	metallothionein 1M (MT1M), mRNA.	Hs.647370	MT1M	16q13
6514893	A_32_P216241	placenta-specific 4 (PLAC4), mRNA.	Hs.472492	PLAC4	21q22.2
6514941	A_23_P76901	pleckstrin homology domain containing, family G (with RhoGef domain) member 3 (PLEKHG3), mRNA.	Hs.509637	PLEKHG3	14q23.3
6515165	A_23_P5301	transcription factor CP2-like 1 (TFCP2L1), mRNA.	Hs.156471	TFCP2L1	2q14
6515708	A_23_P93514	coiled-coil domain containing 170 (CCDC170), mRNA.	Hs.660044	CCDC170	6q25.1
6515861	A_24_P403959	ribonuclease, RNase A family, 1 (pancreatic) (RNASE1), transcript variant 4, mRNA.	Hs.78224	RNASE1	14q11.2
6516498	A_23_P103765	Fc fragment of IgE, high affinity I, receptor for; alpha polypeptide (FCER1A), mRNA.	Hs.897	FCER1A	1q23
6516563	A_32_P23838	cytochrome P450, family 4, subfamily V, polypeptide 2 (CYP4V2), mRNA.	Hs.587231	CYP4V2	4q35.2
6517031	A_24_P279307	CD300 molecule-like family member f (CD300LF), mRNA.	Hs.567706	CD300LF	17q25.1
6517033	A_24_P755069	cathepsin L family member 3 (CTSL3), non-coding RNA.		CTSL3	9q21.33
6517138	A_23_P2431	complement component 3a receptor 1 (C3AR1), mRNA.	Hs.591148	C3AR1	12p13.31
6517355	A_24_P235429	ATP-binding cassette, sub-family A (ABC1), member 1 (ABCA1), mRNA.	Hs.659274	ABCA1	9q31.1
6517816	A_23_P7744	spermatogenesis associated 9 (SPATA9), mRNA.	Hs.50499	SPATA9	5q15
6517857	A_23_P106602	cysteine-rich secretory protein LCCL domain containing 2 (CRISPLD2), mRNA.	Hs.513779	CRISPLD2	16q24.1
6517865	A_23_P70448	histone cluster 1, H1a (HIST1H1A), mRNA.	Hs.150206	HIST1H1A	6p21.3
6518091	A_23_P98786	myosin VIIA (MYO7A), transcript variant 2, mRNA.	Hs.370421	MYO7A	11q13.5
6518155	A_24_P381455	DNA-damage regulated autophagy modulator 1 (DRAM1), mRNA.	Hs.525634	DRAM1	12q23.2
6518435	A_23_P306346	chromosome 9 open reading frame 41 (C9orf41), mRNA.	Hs.567688	C9orf41	9q21.13
6518545	A_23_P81219	placenta-specific 8 (PLAC8), transcript variant 2, mRNA.	Hs.546392	PLAC8	4q21.22
6518619	A_23_P253281	TBC1 domain family, member 8 (with GRAM domain) (TBC1D8), mRNA.	Hs.442657	TBC1D8	2q11.2
6518717	A_23_P27556	egf-like module containing, mucin-like, hormone receptor-like 1 (EMR1), transcript variant 2, mRNA.	Hs.2375	EMR1	19p13.3
6585502	A_23_P201160	CD1e molecule (CD1E), transcript variant 13, mRNA.	Hs.249217	CD1E	1q22-q23
6585828	A_23_P94533	cathepsin L1 (CTSL1), transcript variant 3, mRNA.		CTSL1	9q21.33

## Sheet: Module 3
mAdb ID	Clone	Description	UniGene	Gene	Map
6474506	A_23_P39799	lysyl oxidase-like 3 (LOXL3), mRNA.	Hs.469045	LOXL3	2p13
6474910	A_23_P45133	colony stimulating factor 1 (macrophage) (CSF1), transcript variant 4, mRNA.	Hs.173894	CSF1	1p21-p13
6475565	A_23_P218375	integrin, alpha E (antigen CD103, human mucosal lymphocyte antigen 1; alpha polypeptide) (ITGAE), mRNA.	Hs.513867	ITGAE	17p13
6475727	A_23_P93739	ependymin related protein 1 (zebrafish) (EPDR1), transcript variant 1, mRNA.	Hs.563491	EPDR1	7p14.1
6475926	A_23_P25534	KIAA0564	Hs.368282	KIAA0564	13q14.11
6476006	A_23_P44942	coiled-coil domain containing 15 (CCDC15), mRNA.	Hs.287555	CCDC15	11q24.2
6476324	A_24_P95059	zona pellucida glycoprotein 3 (sperm receptor) (ZP3), transcript variant 2, mRNA.	Hs.656137	ZP3	7q11.23
6476720	A_23_P64792	potassium large conductance calcium-activated channel, subfamily M, beta member 4 (KCNMB4), mRNA.	Hs.525529	KCNMB4	12q
6476986	A_32_P105549	annexin A8-like 1 (ANXA8L1), mRNA.	Hs.524293	ANXA8L1	10q11.22
6476998	A_23_P78518	carcinoembryonic antigen-related cell adhesion molecule 19 (CEACAM19), transcript variant 1, mRNA.	Hs.416925	CEACAM19	19q13.31
6477330	A_23_P44421	HtrA serine peptidase 4 (HTRA4), mRNA.	Hs.661014	HTRA4	8p11.22
6477484	A_23_P113237	cytokine receptor-like factor 2 (CRLF2), transcript variant 2, mRNA.	Hs.287729	CRLF2	Yp11.3
6477744	A_23_P424561	ras homolog family member V (RHOV), mRNA.	Hs.447901	RHOV	15q13.3
6477931	A_23_P65262	NEDD4 binding protein 2-like 2 (N4BP2L2), transcript variant 1, mRNA.	Hs.507680	N4BP2L2	13q13.1
6478175	A_24_P77082	kynurenine 3-monooxygenase (kynurenine 3-hydroxylase) (KMO), mRNA.	Hs.409081	KMO	1q42-q44
6478353	A_24_P932887	SPOC domain containing 1	Hs.62604	SPOCD1	1p35.2
6478395	A_24_P211064	twisted gastrulation homolog 1 (Drosophila) (TWSG1), mRNA.	Hs.514685	TWSG1	18p11.3
6478633	A_23_P128698	sprouty homolog 2 (Drosophila) (SPRY2), mRNA.	Hs.18676	SPRY2	13q31.1
6478665	A_32_P201723	Fibronectin 1	Hs.203717	FN1	2q34
6478756	A_23_P15582	xylosyltransferase II (XYLT2), mRNA.	Hs.463416	XYLT2	17q21.33
6478807	A_23_P95359	DnaJ (Hsp40) homolog, subfamily C, member 6 (DNAJC6), transcript variant 2, mRNA.	Hs.647643	DNAJC6	1p31.3
6479017	A_23_P145786	MLX interacting protein-like (MLXIPL), transcript variant 3, mRNA.	Hs.647055	MLXIPL	7q11.23
6479091	A_32_P456318	serine/arginine-rich splicing factor 12 (SRSF12), mRNA.	Hs.254414	SRSF12	6q15
6479377	A_23_P65851	NKF3 kinase family member (PEAK1), mRNA.	Hs.9587	PEAK1	15q24.3
6479633	A_24_P149314	UL16 binding protein 2 (ULBP2), mRNA.	Hs.656778	ULBP2	6q25
6479967	A_23_P351724	tensin 1 (TNS1), mRNA.	Hs.471381	TNS1	2q35-q36
6480307	A_23_P152559	benzodiazapine receptor (peripheral) associated protein 1 (BZRAP1), transcript variant 1, mRNA.	Hs.112499	BZRAP1	17q22-q23
6480524	A_32_P69149	STEAP family member 1B (STEAP1B), transcript variant 2, mRNA.	Hs.729825	STEAP1B	7p15.3
6480634	A_23_P88691	cholinergic receptor, nicotinic, alpha 5 (neuronal) (CHRNA5), mRNA.	Hs.1614	CHRNA5	15q24
6480953	A_32_P4985	calmodulin binding transcription activator 1 (CAMTA1), transcript variant 1, mRNA.	Hs.397705	CAMTA1	1p36.31-p36.23
6481456	A_24_P915692	pleckstrin homology-like domain, family A, member 1 (PHLDA1), mRNA.	Hs.602085	PHLDA1	12q15
6481762	A_24_P106166	Unknown
6482129	A_24_P282309	myoferlin (MYOF), transcript variant 1, mRNA.	Hs.602086	MYOF	10q24
6482405	A_32_P126259	Transcribed locus	Hs.665461
6482695	A_23_P113453	dystrophin (DMD), transcript variant Dp140bc, mRNA.	Hs.495912	DMD	Xp21.2
6483037	A_23_P259071	amphiregulin (AREG), mRNA.	Hs.270833	AREG	4q13-q21
6483475	A_23_P70688	lymphocyte antigen 86 (LY86), mRNA.	Hs.653138	LY86	6p25.1
6484064	A_24_P179504	WD repeat domain 66 (WDR66), transcript variant 1, mRNA.	Hs.709837	WDR66	12q24.31
6484075	A_23_P250347	calcium/calmodulin-dependent protein kinase IV (CAMK4), mRNA.	Hs.591269	CAMK4	5q21.3
6484440	A_32_P133840	transmembrane and coiled-coil domain family 2 (TMCC2), transcript variant 1, mRNA.	Hs.6360	TMCC2	1q32.1
6484722	A_32_P57775	Erythrocyte membrane protein band 4.1-like 1	Hs.437422	EPB41L1	20q11.2-q12
6485524	A_23_P43484	cyclin-dependent kinase inhibitor 2A (CDKN2A), transcript variant 4, mRNA.	Hs.512599	CDKN2A	9p21
6485753	A_23_P166686	angiomotin like 2 (AMOTL2), mRNA.	Hs.426312	AMOTL2	3q21-q22
6485822	A_24_P500422	uncharacterized LOC730101 (LOC730101), transcript variant 1, non-coding RNA.		LOC730101	6p12.2
6486014	A_32_P169406	uncharacterized LOC400043 (LOC400043), non-coding RNA.		LOC400043	12q13.13
6486032	A_23_P144458	calcium/calmodulin-dependent protein kinase II delta (CAMK2D), transcript variant 3, mRNA.	Hs.144114	CAMK2D	4q26
6486355	A_23_P126782	coagulation factor III (thromboplastin, tissue factor) (F3), transcript variant 1, mRNA.	Hs.62192	F3	1p22-p21
6486648	A_24_P25470	Zinc finger protein 586	Hs.625133	ZNF586	19q13.43
6486656	A_23_P7882	solute carrier family 22, member 23 (SLC22A23), transcript variant 1, mRNA.	Hs.713588	SLC22A23	6p25.2
6486736	A_23_P200866	stathmin 1 (STMN1), transcript variant 1, mRNA.	Hs.209983	STMN1	1p36.11
6486935	A_32_P4581	CDNA FLJ26608 fis, clone LVR00914	Hs.654777
6487069	A_32_P75141	Dehydrogenase/reductase (SDR family) member 3	Hs.289347	DHRS3	1p36.1
6487215	A_23_P300070	IQ motif containing G (IQCG), transcript variant 2, mRNA.	Hs.591675	IQCG	3q29
6487424	A_24_P42755	fms-related tyrosine kinase 1 (vascular endothelial growth factor/vascular permeability factor receptor) (FLT1), transcript variant 1, mRNA.	Hs.594454	FLT1	13q12
6487436	A_23_P121480	CD200 molecule (CD200), transcript variant 1, mRNA.	Hs.79015	CD200	3q12-q13
6489034	A_23_P356554	BCL2-associated athanogene 2 (BAG2), mRNA.	Hs.729098	BAG2	6p12.1-p11.2
6489451	A_23_P369701	family with sequence similarity 108, member C1 (FAM108C1), mRNA.	Hs.459072	FAM108C1	15q25.1
6489851	A_23_P52676	cation channel, sperm associated 1 (CATSPER1), mRNA.	Hs.189105	CATSPER1	11q12.1
6490156	A_23_P384044	cornichon homolog 3 (Drosophila) (CNIH3), mRNA.	Hs.731723	CNIH3	1q42.12
6490772	A_24_P130363	chromosome 18 open reading frame 1 (C18orf1), transcript variant a1, mRNA.	Hs.731853	C18orf1	18p11.21
6490923	A_24_P942648	Enah/Vasp-like	Hs.125867	EVL	14q32.2
6491583	A_32_P222241	Unknown
6491685	A_23_P341567	solute carrier family 9, subfamily B (NHA2, cation proton antiporter 2), member 2 (SLC9B2), nuclear gene encoding mitochondrial protein, mRNA.	Hs.546482	SLC9B2	4q24
6491931	A_23_P117912	ras homolog family member V (RHOV), mRNA.	Hs.447901	RHOV	15q13.3
6491957	A_23_P128447	leucine-rich repeat kinase 2 (LRRK2), mRNA.	Hs.187636	LRRK2	12q12
6492249	A_23_P81094	solute carrier family 9, subfamily B (NHA2, cation proton antiporter 2), member 2 (SLC9B2), nuclear gene encoding mitochondrial protein, mRNA.	Hs.546482	SLC9B2	4q24
6492329	A_23_P384635	DAZ interacting protein 1-like (DZIP1L), transcript variant 1, mRNA.	Hs.351403	DZIP1L	3q22.3
6492356	A_24_P136453	tensin 1 (TNS1), mRNA.	Hs.471381	TNS1	2q35-q36
6492508	A_23_P202810	ovo-like 1(Drosophila) (OVOL1), mRNA.	Hs.134434	OVOL1	11q13
6493024	A_23_P27256	twisted gastrulation homolog 1 (Drosophila) (TWSG1), mRNA.	Hs.514685	TWSG1	18p11.3
6493122	A_24_P113131	benzodiazapine receptor (peripheral) associated protein 1 (BZRAP1), transcript variant 2, mRNA.	Hs.112499	BZRAP1	17q22-q23
6493572	A_24_P114739	calcium/calmodulin-dependent protein kinase II delta (CAMK2D), transcript variant 2, mRNA.	Hs.144114	CAMK2D	4q26
6493604	A_23_P119006	Coiled-coil domain containing 68	Hs.120790	CCDC68	18q21
6493797	A_23_P160159	solute carrier family 2 (facilitated glucose/fructose transporter), member 5 (SLC2A5), transcript variant 1, mRNA.	Hs.530003	SLC2A5	1p36.2
6493910	A_23_P42909	transmembrane protein 139 (TMEM139), transcript variant 3, mRNA.	Hs.731832	TMEM139	7q34
6494006	A_24_P390650	long intergenic non-protein coding RNA 324 (LINC00324), non-coding RNA.		LINC00324	17p13.1
6494323	A_32_P214565	Transcribed locus	Hs.719466
6494665	A_24_P799680	Unknown
6494780	A_23_P435407	glypican 4 (GPC4), mRNA.	Hs.58367	GPC4	Xq26.1
6494787	A_24_P576191	fms-related tyrosine kinase 1 (vascular endothelial growth factor/vascular permeability factor receptor) (FLT1), transcript variant 2, mRNA.	Hs.594454	FLT1	13q12
6495054	A_32_P224040	Enah/Vasp-like	Hs.125867	EVL	14q32.2
6495180	A_32_P95852	GRAM domain containing 2	Hs.596332	GRAMD2	15q23
6495257	A_23_P154806	erythrocyte membrane protein band 4.1-like 1 (EPB41L1), transcript variant 2, mRNA.	Hs.437422	EPB41L1	20q11.2-q12
6495499	A_32_P224498	Clusterin	Hs.436657	CLU	8p21-p12
6496266	A_23_P360754	ADAM metallopeptidase with thrombospondin type 1 motif, 4 (ADAMTS4), mRNA.	Hs.211604	ADAMTS4	1q21-q23
6496542	A_23_P141802	serpin peptidase inhibitor, clade B (ovalbumin), member 7 (SERPINB7), transcript variant 4, mRNA.		SERPINB7	18q21.33
6496610	A_23_P47950	gametocyte specific factor 1 (GTSF1), mRNA.	Hs.524476	GTSF1	12q13.13
6496704	A_23_P256641	KCNE1-like (KCNE1L), mRNA.	Hs.522753	KCNE1L	Xq22.3
6496941	A_23_P160214	tetratricopeptide repeat domain 39A (TTC39A), transcript variant 1, mRNA.	Hs.112949	TTC39A	1p32.3
6498165	A_23_P106103	A kinase (PRKA) anchor protein 5 (AKAP5), mRNA.	Hs.656683	AKAP5	14q23.3
6498549	A_23_P126416	tyrosine kinase with immunoglobulin-like and EGF-like domains 1 (TIE1), transcript variant 2, mRNA.	Hs.78824	TIE1	1p34-p33
6498702	A_23_P76450	pleckstrin homology-like domain, family A, member 1 (PHLDA1), mRNA.	Hs.602085	PHLDA1	12q15
6498798	A_24_P105733	tensin 1 (TNS1), mRNA.	Hs.471381	TNS1	2q35-q36
6499269	A_24_P119745	fibronectin 1 (FN1), transcript variant 6, mRNA.	Hs.203717	FN1	2q34
6499491	A_23_P35916	ataxia telangiectasia mutated (ATM), mRNA.	Hs.367437	ATM	11q22-q23
6499685	A_23_P53588	wingless-type MMTV integration site family, member 5B (WNT5B), transcript variant 2, mRNA.	Hs.306051	WNT5B	12p13.3
6500504	A_24_P84220	Unknown
6500667	A_23_P360379	egl nine homolog 3 (C. elegans) (EGLN3), mRNA.	Hs.135507	EGLN3	14q13.1
6500953	A_23_P342709	F-box protein 15 (FBXO15), transcript variant 1, mRNA.	Hs.664011	FBXO15	18q22.3
6501093	A_23_P162449	SLIT-ROBO Rho GTPase activating protein 1 (SRGAP1), mRNA.	Hs.210751	SRGAP1	12q14.2
6501132	A_23_P215913	clusterin (CLU), transcript variant 1, mRNA.	Hs.436657	CLU	8p21-p12
6501213	A_32_P453321	chromosome 1 open reading frame 228 (C1orf228), mRNA.	Hs.173679	C1orf228	1p34.1
6501412	A_32_P122715	Transcribed locus	Hs.60371		11
6501662	A_23_P125680	family with sequence similarity 70, member A (FAM70A), transcript variant 2, mRNA.	Hs.437563	FAM70A	Xq24
6501885	A_23_P99373	ring finger protein 17 (RNF17), transcript variant 2, mRNA.	Hs.97464	RNF17	13q12.12
6502206	A_32_P213948	Transcribed locus, strongly similar to NP_001374.3 diphthamide biosynthesis protein 1 [Homo sapiens]	Hs.664161
6502366	A_23_P116898	alpha-2-macroglobulin (A2M), mRNA.	Hs.212838	A2M	12p13.31
6503189	A_23_P207939	chromosome 18 open reading frame 1 (C18orf1), transcript variant b1, mRNA.	Hs.731853	C18orf1	18p11.21
6503471	A_23_P257111	fructose-1,6-bisphosphatase 1 (FBP1), transcript variant 2, mRNA.	Hs.494496	FBP1	9q22.3
6504204	A_23_P404667	BCL2-interacting killer (apoptosis-inducing) (BIK), mRNA.	Hs.475055	BIK	22q13.31
6504289	A_32_P35433	Transcribed locus	Hs.189987		13
6504664	A_23_P395609	family with sequence similarity 110, member B (FAM110B), mRNA.	Hs.154652	FAM110B	8q12.1
6505340	A_23_P354387	myoferlin (MYOF), transcript variant 2, mRNA.	Hs.602086	MYOF	10q24
6505466	A_23_P4494	desmocollin 2 (DSC2), transcript variant Dsc2b, mRNA.	Hs.95612	DSC2	18q12.1
6505654	A_24_P919283	CDNA FLJ11928 fis, clone HEMBB1000420	Hs.663607
6505720	A_23_P163306	cingulin-like 1 (CGNL1), transcript variant 1, mRNA.	Hs.148989	CGNL1	15q21.3
6505891	A_32_P153361	Unknown
6506367	A_23_P37410	cytochrome P450, family 19, subfamily A, polypeptide 1 (CYP19A1), transcript variant 2, mRNA.	Hs.260074	CYP19A1	15q21.1
6506451	A_24_P469746	uncharacterized LOC151174 (LOC151174), transcript variant 2, non-coding RNA.		LOC151174	2q37.3
6506475	A_24_P309912	solute carrier family 12 (sodium/chloride transporters), member 3 (SLC12A3), transcript variant 3, mRNA.	Hs.669115	SLC12A3	16q13
6506591	A_23_P500614	tumor necrosis factor receptor superfamily, member 8 (TNFRSF8), transcript variant 2, mRNA.	Hs.1314	TNFRSF8	1p36
6506597	A_24_P201552	fasciculation and elongation protein zeta 1 (zygin I) (FEZ1), transcript variant 1, mRNA.	Hs.224008	FEZ1	11q24.2
6506727	A_23_P86682	myoferlin (MYOF), transcript variant 2, mRNA.	Hs.602086	MYOF	10q24
6506879	A_23_P141346	membrane protein, palmitoylated 3 (MAGUK p55 subfamily member 3) (MPP3), transcript variant 1, mRNA.	Hs.396566	MPP3	17q21.31
6507729	A_32_P20613	Regulator of cell cycle	Hs.507866	RGCC	13q14.11
6508017	A_23_P168259	UL16 binding protein 2 (ULBP2), mRNA.	Hs.656778	ULBP2	6q25
6508151	A_32_P68942	ankyrin repeat domain 20 family, member A5, pseudogene (ANKRD20A5P), non-coding RNA.		ANKRD20A5P	18p11.21
6508160	A_23_P43107	dendrocyte expressed seven transmembrane protein (DCSTAMP), transcript variant 1, mRNA.	Hs.652230	DCSTAMP	8q23
6508215	A_23_P146946	cystatin E/M (CST6), mRNA.	Hs.139389	CST6	11q13
6508612	A_32_P47988	calcium/calmodulin-dependent protein kinase II delta (CAMK2D), transcript variant 3, mRNA.	Hs.144114	CAMK2D	4q26
6508910	A_24_P8109	anoctamin 9 (ANO9), mRNA.	Hs.501622	ANO9	11p15.5
6509293	A_23_P55477	adenosine A2b receptor (ADORA2B), mRNA.	Hs.167046	ADORA2B	17p12
6509620	A_23_P82449	deafness, autosomal dominant 5 (DFNA5), transcript variant 1, mRNA.	Hs.520708	DFNA5	7p15
6509869	A_32_P105311	Transcribed locus	Hs.445843		2
6510126	A_32_P153195	brain expressed, associated with NEDD4, 1 (BEAN1), transcript variant 2, mRNA.	Hs.97805	BEAN1	16q21
6510342	A_23_P379054	claudin 19 (CLDN19), transcript variant 3, mRNA.	Hs.496270	CLDN19	1p34.2
6510526	A_24_P943597	pleckstrin homology-like domain, family A, member 1 (PHLDA1), mRNA.	Hs.602085	PHLDA1	12q15
6510868	A_23_P146233	lipoprotein lipase (LPL), mRNA.	Hs.180878	LPL	8p22
6511035	A_23_P170534	fucosyltransferase 7 (alpha (1,3) fucosyltransferase) (FUT7), mRNA.	Hs.457	FUT7	9q34.3
6511090	A_23_P19673	serum/glucocorticoid regulated kinase 1 (SGK1), transcript variant 1, mRNA.	Hs.510078	SGK1	6q23
6511123	A_23_P217946	cadherin-related 23 (CDH23), transcript variant 1, mRNA.	Hs.656032	CDH23	10q22.1
6511551	A_23_P32036	nicotinamide riboside kinase 1 (NMRK1), transcript variant 2, mRNA.	Hs.494186	NMRK1	9q21.13
6511568	A_23_P106024	jagged 2 (JAG2), transcript variant 1, mRNA.	Hs.433445	JAG2	14q32
6511767	A_23_P431388	SPOC domain containing 1 (SPOCD1), mRNA.	Hs.62604	SPOCD1	1p35.2
6511926	A_24_P112377	DEAD (Asp-Glu-Ala-Asp) box polypeptide 31 (DDX31), transcript variant 1, mRNA.	Hs.660767	DDX31	9q34.13
6511983	A_23_P141345	membrane protein, palmitoylated 3 (MAGUK p55 subfamily member 3) (MPP3), transcript variant 1, mRNA.	Hs.396566	MPP3	17q21.31
6512055	A_23_P87952	SRY (sex determining region Y)-box 5 (SOX5), transcript variant 2, mRNA.	Hs.657542	SOX5	12p12.1
6512123	A_23_P114057	sema domain, immunoglobulin domain (Ig), transmembrane domain (TM) and short cytoplasmic domain, (semaphorin) 4C (SEMA4C), mRNA.	Hs.516220	SEMA4C	2q11.2
6512235	A_32_P63266	Unknown
6512274	A_23_P422212	solute carrier family 35, member F3 (SLC35F3), mRNA.	Hs.158748	SLC35F3	1q42.2
6512476	A_23_P134426	glycoprotein (transmembrane) nmb (GPNMB), transcript variant 2, mRNA.	Hs.190495	GPNMB	7p15
6512617	A_24_P85539	fibronectin 1 (FN1), transcript variant 5, mRNA.	Hs.203717	FN1	2q34
6512977	A_32_P184268	MRNA; cDNA DKFZp686G2095 (from clone DKFZp686G2095)	Hs.254789		14
6513029	A_23_P406341	actin filament associated protein 1-like 2 (AFAP1L2), transcript variant 2, mRNA.	Hs.501106	AFAP1L2	10q25.3
6513202	A_23_P415652	UDP-N-acetyl-alpha-D-galactosamine:polypeptide N-acetylgalactosaminyltransferase 12 (GalNAc-T12) (GALNT12), mRNA.	Hs.47099	GALNT12	9q22.33
6513349	A_24_P334130	fibronectin 1 (FN1), transcript variant 3, mRNA.	Hs.203717	FN1	2q34
6513655	A_23_P48217	apolipoprotein L domain containing 1 (APOLD1), transcript variant 2, mRNA.	Hs.23388	APOLD1	12p13.1
6514219	A_24_P109214	apolipoprotein C-I (APOC1), mRNA.	Hs.110675	APOC1	19q13.2
6514285	A_32_P101490	ankyrin repeat domain 18A (ANKRD18A), mRNA.	Hs.644630	ANKRD18A	9p13.1
6514303	A_32_P138396	Uncharacterized LOC100131176	Hs.659231	LOC100131176	7q36.1
6514595	A_23_P140427	Enah/Vasp-like (EVL), mRNA.	Hs.125867	EVL	14q32.2
6514961	A_32_P134556	Tropomodulin 2 (neuronal)	Hs.513734	TMOD2	15q21.2
6515290	A_24_P158089	serpin peptidase inhibitor, clade E (nexin, plasminogen activator inhibitor type 1), member 1 (SERPINE1), transcript variant 2, mRNA.	Hs.414795	SERPINE1	7q21.3-q22
6515350	A_23_P145965	tyrosylprotein sulfotransferase 1 (TPST1), mRNA.	Hs.421194	TPST1	7q11.21
6515549	A_32_P13151	Transcribed locus, weakly similar to XP_003309166.1 PREDICTED: ankyrin repeat domain-containing protein 20B-like isoform 2 [Pan troglodytes]	Hs.722199
6515582	A_24_P202497	twisted gastrulation homolog 1 (Drosophila) (TWSG1), mRNA.	Hs.514685	TWSG1	18p11.3
6515653	A_32_P92642	Fibronectin 1	Hs.203717	FN1	2q34
6515695	A_24_P95070	Transcribed locus	Hs.702084		7
6515727	A_32_P113971	KIAA1755 (KIAA1755), mRNA.	Hs.472690	KIAA1755	20q11.23
6515792	A_24_P175589	Coiled-coil and C2 domain containing 2B	Hs.538374	CC2D2B	10q24.1
6516107	A_32_P72110	poliovirus receptor (PVR), transcript variant 3, mRNA.	Hs.171844	PVR	19q13.2
6516138	A_23_P131308	cytochrome P450, family 27, subfamily A, polypeptide 1 (CYP27A1), nuclear gene encoding mitochondrial protein, mRNA.	Hs.516700	CYP27A1	2q33-qter
6516142	A_23_P4649	apolipoprotein C-I (APOC1), mRNA.	Hs.110675	APOC1	19q13.2
6516517	A_23_P215479	CAP-GLY domain containing linker protein 2 (CLIP2), transcript variant 2, mRNA.	Hs.647018	CLIP2	7q11.23
6516569	A_23_P208302	apolipoprotein C-II (APOC2), mRNA.	Hs.75615	APOC2	19q13.2
6516836	A_32_P204376	ankyrin repeat domain 20 family, member A5, pseudogene (ANKRD20A5P), non-coding RNA.		ANKRD20A5P	18p11.21
6516987	A_23_P129038	Enah/Vasp-like (EVL), mRNA.	Hs.125867	EVL	14q32.2
6517331	A_32_P124833	3-oxoacid CoA transferase 2	Hs.472491	OXCT2	1p34
6517548	A_24_P237036	tumor necrosis factor (ligand) superfamily, member 14 (TNFSF14), transcript variant 1, mRNA.	Hs.129708	TNFSF14	19p13.3
6517564	A_23_P253395	unc-13 homolog B (C. elegans) (UNC13B), mRNA.	Hs.493791	UNC13B	9p13.3
6517687	A_23_P41476	shisa homolog 3 (Xenopus laevis) (SHISA3), mRNA.	Hs.370904	SHISA3	4p13
6517943	A_32_P139113	Unknown
6518348	A_23_P139500	basic helix-loop-helix family, member e41 (BHLHE41), mRNA.	Hs.177841	BHLHE41	12p12.1
6518606	A_23_P257043	GTP binding protein overexpressed in skeletal muscle (GEM), transcript variant 2, mRNA.	Hs.654463	GEM	8q13-q21
6518714	A_24_P200023	interleukin 1 receptor, type I (IL1R1), mRNA.	Hs.701982	IL1R1	2q12
6585953	A_24_P126139	RAB9B, member RAS oncogene family (RAB9B), mRNA.	Hs.522736	RAB9B	Xq22.1-q22.3
6585965	A_23_P162668	carboxypeptidase M (CPM), transcript variant 3, mRNA.	Hs.654387	CPM	12q14.3

## Sheet: Module 4
mAdb ID	Clone	Description	UniGene	Gene	Map
6474527	A_32_P125917	BF238843 601904455F1 NIH_MGC_54 Homo sapiens cDNA clone IMAGE:4132429 5', mRNA sequence [BF238843]
6474583	A_32_P63461	Transcribed locus	Hs.493516
6474677	A_24_P485451	Transcribed locus	Hs.687591
6474873	A_32_P149298	KIAA1841 (KIAA1841), transcript variant 1, mRNA.	Hs.468653	KIAA1841	2q14
6475048	A_23_P46813	cytoplasmic polyadenylation element binding protein 3 (CPEB3), transcript variant 2, mRNA.	Hs.131683	CPEB3	10q23.32
6475064	A_23_P137957	round spermatid basic protein 1 (RSBN1), mRNA.	Hs.486285	RSBN1	1p13.2
6475508	A_23_P170280	ATPase, class V, type 10D (ATP10D), mRNA.	Hs.437241	ATP10D	4p12
6476009	A_24_P415839	ligase IV, DNA, ATP-dependent (LIG4), transcript variant 2, mRNA.	Hs.166091	LIG4	13q33-q34
6476553	A_24_P457912	Phosphatidylinositol glycan anchor biosynthesis, class U	Hs.253319	PIGU	20q11.22
6477038	A_23_P98463	transforming growth factor beta regulator 1 (TBRG1), transcript variant 1, mRNA.	Hs.436410	TBRG1	11q24.2
6477358	A_23_P97810	Poly (ADP-ribose) glycohydrolase	Hs.732225	PARG	10q11.23
6477517	A_24_P130952	mixed lineage kinase 4 (KIAA1804), mRNA.	Hs.547779	KIAA1804	1q42
6477914	A_32_P223327	Transcribed locus	Hs.659842
6478141	A_24_P377225	ubiquitin specific peptidase 46 (USP46), transcript variant 1, mRNA.	Hs.7966	USP46	4q12
6478250	A_24_P153754	adaptor-related protein complex 5, mu 1 subunit (AP5M1), transcript variant 1, mRNA.	Hs.597349	AP5M1	14q22.3
6478330	A_23_P68700	DnaJ (Hsp40) homolog, subfamily C, member 28 (DNAJC28), transcript variant 1, mRNA.	Hs.458308	DNAJC28	21q22.11
6478442	A_24_P114339	required for meiotic nuclear division 5 homolog A (S. cerevisiae) (RMND5A), mRNA.	Hs.75277	RMND5A	2p11.2
6478556	A_23_P361419	DEP domain containing 1B (DEPDC1B), transcript variant 1, mRNA.	Hs.482233	DEPDC1B	5q12.1
6478622	A_23_P59960	cysteine-rich secretory protein LCCL domain containing 1 (CRISPLD1), mRNA.	Hs.436542	CRISPLD1	8q21.11
6479150	A_23_P30649	sperm acrosome associated 1 (SPACA1), mRNA.	Hs.161241	SPACA1	6q15
6479631	A_23_P7253	La ribonucleoprotein domain family, member 1B (LARP1B), transcript variant 1, mRNA.	Hs.657067	LARP1B	4q28.2
6479635	A_24_P934583	PREDICTED: GALI1870 (LOC100133299), miscRNA.	Hs.679984	LOC100133299	5
6479724	A_23_P6714	SUMO1/sentrin specific peptidase 7 (SENP7), transcript variant 1, mRNA.	Hs.529551	SENP7	3q12
6479797	A_24_P104278	DDHD domain containing 1 (DDHD1), transcript variant 3, mRNA.	Hs.125525	DDHD1	14q21
6480134	A_24_P137713	zinc finger protein 323 (ZNF323), transcript variant 4, mRNA.	Hs.656413	ZNF323	6p21.31
6480276	A_23_P10081	ADP-ribosylation factor-like 13B (ARL13B), transcript variant 4, mRNA.	Hs.533086	ARL13B	3q11.1
6480719	A_24_P12904	transmembrane protein 245 (TMEM245), mRNA.	Hs.308074	TMEM245	9q31
6480727	A_23_P406702	calmodulin regulated spectrin-associated protein family, member 2 (CAMSAP2), mRNA.	Hs.23585	CAMSAP2	1q32.1
6481114	A_23_P11598	zinc finger protein 684 (ZNF684), mRNA.	Hs.524767	ZNF684	1p34.2
6481560	A_23_P379794	phosphatidylinositol glycan anchor biosynthesis, class W (PIGW), mRNA.	Hs.378885	PIGW	17q12
6481652	A_23_P377291	transforming growth factor, alpha (TGFA), transcript variant 2, mRNA.	Hs.170009	TGFA	2p13
6481731	A_32_P54242	ligand dependent nuclear receptor corepressor-like (LCORL), transcript variant 2, mRNA.	Hs.446201	LCORL	4p15.31
6481742	A_24_P414712	bromodomain and PHD finger containing, 3 (BRPF3), mRNA.	Hs.520096	BRPF3	6p21
6481759	A_24_P303097	sorting nexin 25 (SNX25), mRNA.	Hs.369091	SNX25	4q35.1
6482167	A_24_P690273	CDNA: FLJ21247 fis, clone COL01205	Hs.612889		1
6482300	A_32_P185029	mitochondrial ribosomal protein L30 (MRPL30), nuclear gene encoding mitochondrial protein, transcript variant 1, mRNA.	Hs.346736	MRPL30	2q11.2
6482331	A_23_P422766	kelch domain containing 1 (KLHDC1), mRNA.	Hs.509258	KLHDC1	14q21.3
6482610	A_24_P942370	POC1B-GALNT4 readthrough (POC1B-GALNT4), transcript variant 1, mRNA.	Hs.25130	POC1B-GALNT4	12q
6482769	A_23_P125042	Zinc finger protein 222	Hs.279840	ZNF222	19q13.2
6482924	A_24_P19983	B-cell CLL/lymphoma 10 (BCL10), mRNA.	Hs.193516	BCL10	1p22
6483486	A_24_P518298	Nascent polypeptide-associated complex alpha subunit	Hs.505735	NACA	12q23-q24.1
6483748	A_23_P350879	Ubiquitin associated protein 1	Hs.268963	UBAP1	9p13.3
6483955	A_23_P217741	chloride channel, voltage-sensitive 4 (CLCN4), transcript variant 1, mRNA.	Hs.495674	CLCN4	Xp22.3
6483957	A_23_P312252	chromosome 15 open reading frame 40 (C15orf40), transcript variant 1, mRNA.	Hs.352541	C15orf40	15q25.2
6484217	A_24_P944991	SREK1-interacting protein 1 (SREK1IP1), mRNA.	Hs.69504	SREK1IP1	5q12.3
6484269	A_24_P171058	transmembrane protein 64 (TMEM64), transcript variant 2, mRNA.	Hs.567759	TMEM64	8q21.3
6484567	A_24_P924329	zinc finger protein 234 (ZNF234), transcript variant 2, mRNA.	Hs.235992	ZNF234	19q13.31
6485229	A_32_P118250	DHRS4 antisense RNA 1 (non-protein coding) (DHRS4-AS1), transcript variant 2, non-coding RNA.		DHRS4-AS1	14q11.2
6485396	A_32_P94667	phosphodiesterase 4D interacting protein pseudogene (LOC728989), non-coding RNA.		LOC728989	1q21.1
6485426	A_23_P142537	Transcribed locus	Hs.732637
6485762	A_24_P941922	CCR4-NOT transcription complex, subunit 4	Hs.490224	CNOT4	7q22-qter
6485836	A_24_P118411	Unknown
6485853	A_23_P159865	uracil phosphoribosyltransferase (FUR1) homolog (S. cerevisiae) (UPRT), transcript variant 1, mRNA.	Hs.91612	UPRT	Xq13.3
6485868	A_23_P71526	ArfGAP with SH3 domain, ankyrin repeat and PH domain 1 (ASAP1), transcript variant 2, mRNA.	Hs.655552	ASAP1	8q24.1-q24.2
6485915	A_24_P163590	chromosome 7 open reading frame 60 (C7orf60), mRNA.	Hs.489734	C7orf60	7q31.1
6486240	A_24_P246636	similar to HIG1 domain family member 1A (Hypoxia-inducible gene 1 protein)		LOC643940
6486543	A_23_P149345	protein tyrosine phosphatase, non-receptor type 22 (lymphoid) (PTPN22), transcript variant 3, mRNA.	Hs.535276	PTPN22	1p13.2
6486550	A_23_P356139	family with sequence similarity 178, member A (FAM178A), transcript variant 1, mRNA.	Hs.447458	FAM178A	10q24.31
6486764	A_23_P420269	integrator complex subunit 2 (INTS2), transcript variant 1, mRNA.	Hs.279646	INTS2	17q23.2
6486806	A_32_P170759	Transcribed locus	Hs.501239		10
6487337	A_23_P106663	CKLF-like MARVEL transmembrane domain containing 1 (CMTM1), transcript variant 17, mRNA.	Hs.698621	CMTM1	16q21
6487490	A_32_P225355	cytoplasmic polyadenylation element binding protein 2 (CPEB2), transcript variant D, mRNA.	Hs.656937	CPEB2	4p15.33
6487917	A_32_P34516	XK, Kell blood group complex subunit-related family, member 6	Hs.665456	XKR6	8p23.1
6489590	A_24_P790361	Unknown
6489892	A_32_P7204	RAB28, member RAS oncogene family (RAB28), transcript variant 2, mRNA.	Hs.656060	RAB28	4p15.33
6490215	A_24_P89718	tetratricopeptide repeat domain 26 (TTC26), transcript variant 3, mRNA.	Hs.644553	TTC26	7q34
6490276	A_24_P464540	family with sequence similarity 41, member C (FAM41C), non-coding RNA.		FAM41C	1p36.33
6490285	A_23_P330578	leucine rich repeat containing 39 (LRRC39), transcript variant 2, mRNA.	Hs.44277	LRRC39	1p21.2
6490337	A_24_P930487	Unknown
6490658	A_23_P154130	mitogen-activated protein kinase kinase kinase kinase 3 (MAP4K3), transcript variant 1, mRNA.	Hs.655750	MAP4K3	2p22.1
6491027	A_24_P286868	Transcribed locus	Hs.432548		10
6491686	A_23_P33376	cyclin-dependent kinase 17 (CDK17), transcript variant 1, mRNA.	Hs.506415	CDK17	12q23.1
6491716	A_24_P339450	zinc finger protein 24 (ZNF24), mRNA.	Hs.514802	ZNF24	18q12
6492007	A_32_P211188	peroxisome proliferator-activated receptor gamma, coactivator 1 beta (PPARGC1B), transcript variant 2, mRNA.	Hs.483816	PPARGC1B	5q32
6492039	A_23_P348992	Myb-like, SWIRM and MPN domains 1 (MYSM1), mRNA.	Hs.477495	MYSM1	1p32.1
6492120	A_32_P216015	RL2A_HUMAN (P46776) 60S ribosomal protein L27a, partial (20%) [THC2301901]
6492269	A_24_P371399	chromosome 3 open reading frame 58 (C3orf58), transcript variant 2, mRNA.	Hs.288954	C3orf58	3q24
6492312	A_32_P155826	uncharacterized LOC158572 (LOC158572), non-coding RNA.		LOC158572	Xp11.23
6493413	A_23_P218863	polybromo 1 (PBRM1), mRNA.	Hs.189920	PBRM1	3p21
6493929	A_23_P303815	beta-gamma crystallin domain containing 3 (CRYBG3), mRNA.		CRYBG3	3q11.2
6493971	A_32_P101334	CDNA FLJ34307 fis, clone FEBRA2008134	Hs.380803		13
6494066	A_23_P370162	X-ray radiation resistance associated 1 (XRRA1), transcript variant 2, mRNA.		XRRA1	11q13.4
6494104	A_24_P244699	nudix (nucleoside diphosphate linked moiety X)-type motif 15 (NUDT15), mRNA.	Hs.144407	NUDT15	13q14.2
6494191	A_23_P303423	SLAIN motif family, member 2 (SLAIN2), mRNA.	Hs.479677	SLAIN2	4p11
6494339	A_32_P115349	Unknown
6494376	A_23_P135787	golgin B1 (GOLGB1), transcript variant 4, mRNA.	Hs.213389	GOLGB1	3q13
6495061	A_24_P50294	Unknown
6495102	A_23_P53530	MTERF domain containing 3 (MTERFD3), transcript variant 2, mRNA.	Hs.5009	MTERFD3	12q24.1
6495188	A_23_P3866	coactosin-like 1 (Dictyostelium) (COTL1), mRNA.	Hs.289092	COTL1	16q24.1
6495206	A_24_P548453	crystallin, zeta (quinone reductase) (CRYZ), transcript variant 3, mRNA.	Hs.83114	CRYZ	1p31-p22
6495323	A_24_P20767	Transcribed locus	Hs.684512
6495591	A_23_P426140	zyg-11 homolog B (C. elegans) (ZYG11B), mRNA.	Hs.476280	ZYG11B	1p32.3
6495756	A_23_P345820	WD repeat and FYVE domain containing 3 (WDFY3), mRNA.	Hs.480116	WDFY3	4q21.23
6495849	A_24_P231104	leptin receptor (LEPR), transcript variant 6, mRNA.	Hs.723178	LEPR	1p31
6496166	A_24_P149023	secretory carrier membrane protein 1 (SCAMP1), mRNA.	Hs.482587	SCAMP1	5q14.1
6496364	A_23_P119778	solute carrier family 39 (zinc transporter), member 10 (SLC39A10), transcript variant 2, mRNA.	Hs.650158	SLC39A10	2q32.3
6496432	A_23_P349882	phosducin-like (PDCL), mRNA.	Hs.271749	PDCL	9q12-q13
6496512	A_24_P459522	CDNA FLJ20137 fis, clone COL07137	Hs.675417
6496531	A_32_P144326	CDNA FLJ34195 fis, clone FCBBF3019320	Hs.655024		9
6496759	A_32_P5714	zyg-11 homolog B (C. elegans) (ZYG11B), mRNA.	Hs.476280	ZYG11B	1p32.3
6497051	A_23_P436407	holocytochrome c synthase (HCCS), transcript variant 3, mRNA.	Hs.211571	HCCS	Xp22.3
6497546	A_24_P20623	Unknown
6497583	A_24_P292710	chromosome 14 open reading frame 129 (C14orf129), mRNA.	Hs.4104	C14orf129	14q32.2
6497740	A_24_P24444	endo/exonuclease (5'-3'), endonuclease G-like (EXOG), nuclear gene encoding mitochondrial protein, transcript variant 1, mRNA.	Hs.517897	EXOG	3p21.3
6497745	A_24_P118953	Unknown
6497966	A_32_P19193	Unknown
6498073	A_23_P502174	dynein, cytoplasmic 2, light intermediate chain 1 (DYNC2LI1), transcript variant 2, mRNA.	Hs.371597	DYNC2LI1	2p25.1-p24.1
6498491	A_23_P83751	chromosome 11 open reading frame 63 (C11orf63), transcript variant 1, mRNA.	Hs.164705	C11orf63	11q24.1
6498625	A_24_P134727	transcription factor A, mitochondrial pseudogene 1 (TFAMP1), non-coding RNA.		TFAMP1	7p22.3
6498766	A_23_P81522	tetratricopeptide repeat domain 33 (TTC33), mRNA.	Hs.348915	TTC33	5p13.1
6498919	A_24_P320880	sorting nexin 16 (SNX16), transcript variant 3, mRNA.	Hs.492121	SNX16	8q21.13
6498982	A_32_P131342	Transcribed locus	Hs.622425
6499203	A_24_P37519	leucine zipper transcription factor-like 1 (LZTFL1), mRNA.	Hs.30824	LZTFL1	3p21.3
6499394	A_23_P59999	Tetratricopeptide repeat domain 35	Hs.654351	TTC35	8q23.1
6499975	A_23_P123039	nucleoporin like 2 (NUPL2), mRNA.	Hs.408241	NUPL2	7p15
6500006	A_24_P943792	CD47 molecule (CD47), transcript variant 2, mRNA.	Hs.446414	CD47	3q13.1-q13.2
6500714	A_32_P85578	Transcribed locus	Hs.391527		6
6500853	A_23_P74794	ATP-binding cassette, sub-family D (ALD), member 3 (ABCD3), transcript variant 1, mRNA.	Hs.700576	ABCD3	1p21.3
6500955	A_23_P413180	Mdm1 nuclear protein homolog (mouse) (MDM1), transcript variant 4, mRNA.	Hs.655702	MDM1	12q15
6501356	A_23_P139958	cyclin-dependent kinase 8 (CDK8), mRNA.	Hs.382306	CDK8	13q12
6501691	A_24_P41540	Unknown
6501856	A_32_P15364	Transcribed locus	Hs.121667		10
6502086	A_23_P362261	ferredoxin-fold anticodon binding domain containing 1 (FDXACB1), transcript variant 1, mRNA.	Hs.697132	FDXACB1	11q23.1
6502479	A_23_P58497	UTP15, U3 small nucleolar ribonucleoprotein, homolog (S. cerevisiae) (UTP15), mRNA.	Hs.406703	UTP15	5q13.2
6502537	A_23_P316487	H2A histone family, member V (H2AFV), transcript variant 2, mRNA.	Hs.488189	H2AFV	7p13
6502830	A_23_P398836	thioredoxin domain containing 16 (TXNDC16), transcript variant 2, mRNA.	Hs.532609	TXNDC16	14q22.1
6502899	A_23_P62133	myotubularin 1 (MTM1), mRNA.	Hs.655056	MTM1	Xq28
6503019	A_32_P27964	BC048287 SEC63-like protein {Homo sapiens;} , partial (46%) [THC2281696]
6503038	A_23_P34424	potassium voltage-gated channel, KQT-like subfamily, member 4 (KCNQ4), transcript variant 1, mRNA.	Hs.473058	KCNQ4	1p34
6503199	A_32_P31206	Unknown
6503232	A_23_P394323	Family with sequence similarity 98, member B	Hs.6799	FAM98B	15q14
6503951	A_24_P202139	methyltransferase like 9 (METTL9), transcript variant 2, mRNA.	Hs.279583	METTL9	16p12.2
6504545	A_32_P67747	RNA binding motif protein 41 (RBM41), transcript variant 2, mRNA.	Hs.139053	RBM41	Xq22.3
6504733	A_23_P125147	RAB28, member RAS oncogene family (RAB28), transcript variant 2, mRNA.	Hs.656060	RAB28	4p15.33
6504780	A_24_P842962	zinc finger, X-linked, duplicated A (ZXDA), mRNA.	Hs.550094	ZXDA	Xp11.1
6504948	A_32_P175077	PREDICTED: hypothetical LOC100505930 (LOC100505930), miscRNA.		LOC100505930	4
6505266	A_23_P73677	Rhox homeobox family, member 2B (RHOXF2B), mRNA.	Hs.196956	RHOXF2B	Xq24
6505537	A_23_P52885	Myb/SANT-like DNA-binding domain containing 2 (MSANTD2), mRNA.	Hs.146079	MSANTD2	11q24.2
6505721	A_32_P76156	RWD domain containing 4 (RWDD4), mRNA.	Hs.133337	RWDD4	4q35.1
6506127	A_24_P308590	abhydrolase domain containing 10 (ABHD10), mRNA.	Hs.477115	ABHD10	3q13.2
6506428	A_23_P121722	odz, odd Oz/ten-m homolog 3 (Drosophila) (ODZ3), mRNA.	Hs.130438	ODZ3	4q35.1
6506568	A_23_P124427	NIMA (never in mitosis gene a)-related kinase 1 (NEK1), transcript variant 4, mRNA.	Hs.481181	NEK1	4q33
6507011	A_23_P159119	cyclin-dependent kinase 12 (CDK12), transcript variant 2, mRNA.	Hs.416108	CDK12	17q12
6507318	A_24_P192933	ubiquitin associated and SH3 domain containing B (UBASH3B), mRNA.	Hs.444075	UBASH3B	11q24.1
6507462	A_24_P300394	glutathione S-transferase alpha 2 (GSTA2), mRNA.	Hs.94107	GSTA2	6p12.1
6507492	A_24_P403303	PHD finger protein 20-like 1 (PHF20L1), transcript variant 3, mRNA.	Hs.304362	PHF20L1	8q24.22
6507635	A_24_P268856	pleiotropic regulator 1 (PLRG1), transcript variant 2, mRNA.	Hs.249996	PLRG1	4q31.2-q32.1
6507684	A_24_P942743	zinc finger protein, Y-linked (ZFY), transcript variant 1, mRNA.	Hs.522845	ZFY	Yp11.3
6507854	A_24_P174341	cyclin T2 (CCNT2), transcript variant b, mRNA.	Hs.731949	CCNT2	2q21.3
6508077	A_24_P161074	Unknown
6508300	A_24_P301629	zinc finger protein 155 (ZNF155), transcript variant 4, mRNA.		ZNF155	19q13.2-q13.32
6508368	A_24_P97405	chemokine (C-C motif) receptor-like 2 (CCRL2), transcript variant 2, mRNA.	Hs.535713	CCRL2	3p21
6508874	A_24_P376441	TAF5-like RNA polymerase II, p300/CBP-associated factor (PCAF)-associated factor, 65kDa (TAF5L), transcript variant 2, mRNA.	Hs.270621	TAF5L	1q42.13
6509042	A_32_P44620	CDNA FLJ41444 fis, clone BRSTN2001801	Hs.659105		15
6509820	A_24_P273004	Unknown
6510140	A_23_P315421	Uncharacterized LOC143153	Hs.706372	FLJ31958	10q11.23
6510313	A_32_P61132	Unknown
6510356	A_24_P288116	CDNA clone IMAGE:4798675	Hs.656958		18
6510847	A_32_P107935	Transcribed locus	Hs.568305
6511092	A_24_P29594	HBS1-like (S. cerevisiae) (HBS1L), transcript variant 1, mRNA.	Hs.378532	HBS1L	6q23.3
6511445	A_23_P308464	AT rich interactive domain 2 (ARID, RFX-like)	Hs.317304	ARID2	12q12
6511506	A_24_P165816	cyclin T2 (CCNT2), transcript variant b, mRNA.	Hs.731949	CCNT2	2q21.3
6511693	A_24_P686975	family with sequence similarity 126, member B (FAM126B), mRNA.	Hs.24701	FAM126B	2q33.1
6511900	A_24_P213542	Lines homolog (Drosophila)	Hs.105633	LINS	15q26.3
6512316	A_24_P416131	coactosin-like 1 (Dictyostelium) (COTL1), mRNA.	Hs.289092	COTL1	16q24.1
6512715	A_23_P170600	epilepsy, progressive myoclonus type 2A, Lafora disease (laforin) (EPM2A), transcript variant 1, mRNA.	Hs.486696	EPM2A	6q24
6513097	A_32_P73535	Transcribed locus	Hs.728959
6513159	A_24_P8349	zinc finger, FYVE domain containing 16 (ZFYVE16), transcript variant 2, mRNA.	Hs.482660	ZFYVE16	5q14
6513224	A_23_P214156	SUMO1/sentrin specific peptidase 6 (SENP6), transcript variant 2, mRNA.	Hs.485784	SENP6	6q13-q14.3
6513446	A_23_P431252	kelch repeat and BTB (POZ) domain containing 8 (KBTBD8), mRNA.	Hs.116665	KBTBD8	3p14
6513523	A_24_P58147	LMBR1 domain containing 2 (LMBRD2), mRNA.	Hs.294103	LMBRD2	5p13.2
6513618	A_32_P3317	Transcribed locus	Hs.710089		2
6513668	A_24_P355246	Transcribed locus	Hs.732073		9
6513782	A_24_P59494	poly (ADP-ribose) polymerase family, member 11 (PARP11), mRNA.	Hs.657268	PARP11	12p13.3
6514231	A_24_P13715	F-box protein 22 (FBXO22), transcript variant 1, mRNA.	Hs.591115	FBXO22	15q24.2
6514638	A_23_P121564	guanylate cyclase 1, soluble, beta 3 (GUCY1B3), mRNA.	Hs.77890	GUCY1B3	4q31.3-q33
6514703	A_24_P173124	folliculin (FLCN), transcript variant 1, mRNA.	Hs.31652	FLCN	17p11.2
6515005	A_23_P146134	dual specificity phosphatase 26 (putative) (DUSP26), mRNA.	Hs.8719	DUSP26	8p12
6515249	A_23_P145053	tubulin, epsilon 1 (TUBE1), mRNA.	Hs.34851	TUBE1	6q21
6515448	A_24_P364072	CDNA clone IMAGE:4799578	Hs.709696
6515659	A_23_P34460	solute carrier family 35 (UDP-N-acetylglucosamine (UDP-GlcNAc) transporter), member A3 (SLC35A3), mRNA.	Hs.448979	SLC35A3	1p21
6515919	A_24_P80776	chromosome 6 open reading frame 228 (C6orf228), mRNA.	Hs.656600	C6orf228	6p24.2
6516003	A_23_P145035	Lysine (K)-specific demethylase 1B	Hs.709336	KDM1B	6p22.3
6516040	A_23_P85218	SRY (sex determining region Y)-box 3 (SOX3), mRNA.	Hs.157429	SOX3	Xq27.1
6516057	A_24_P501698	Transcribed locus	Hs.23606		8
6516207	A_32_P196115	zinc finger protein 498 (ZNF498), mRNA.	Hs.446297	ZNF498	7q22.1
6516442	A_24_P285522	mitogen-activated protein kinase kinase kinase kinase 3 (MAP4K3), transcript variant 2, mRNA.		MAP4K3	2p22.1
6516510	A_24_P256830	exocyst complex component 5 (EXOC5), mRNA.	Hs.731497	EXOC5	14q22.3
6516847	A_23_P58815	F-box protein 4 (FBXO4), transcript variant 1, mRNA.	Hs.165575	FBXO4	5p12
6516861	A_23_P41664	leucine rich repeat containing 70 (LRRC70), mRNA.	Hs.721348	LRRC70	5q12.1
6517008	A_32_P124926	Unknown
6517076	A_24_P30670	WW domain binding protein 4 (formin binding protein 21) (WBP4), mRNA.	Hs.411300	WBP4	13q14.11
6517148	A_24_P743869	BBSome interacting protein 1 (BBIP1), transcript variant 5, mRNA.	Hs.232543	BBIP1	10q25.2
6517321	A_24_P219114	sel-1 suppressor of lin-12-like (C. elegans) (SEL1L), transcript variant 1, mRNA.	Hs.181300	SEL1L	14q31
6517449	A_32_P137382	phosphodiesterase 7A (PDE7A), transcript variant 1, mRNA.	Hs.527119	PDE7A	8q13
6517796	A_23_P207981	Suppressor of cytokine signaling 6	Hs.44439	SOCS6	18q22.2
6518028	A_23_P352494	Rhox homeobox family, member 2 (RHOXF2), mRNA.	Hs.567620	RHOXF2	Xq24
6518251	A_23_P311885	l(3)mbt-like 3 (Drosophila) (L3MBTL3), transcript variant 2, mRNA.	Hs.658051	L3MBTL3	6q23
6518282	A_23_P336728	Full length insert cDNA clone YY74A07	Hs.596944
6518524	A_23_P149813	Ras suppressor protein 1 (RSU1), transcript variant 2, mRNA.	Hs.524161	RSU1	10p13

## Sheet: Module 5
mAdb ID	Clone	Description	UniGene	Gene	Map
6475069	A_24_P384604	Unknown
6475495	A_32_P200144	Immunoglobulin heavy constant gamma 1 (G1m marker)	Hs.510635	IGHG1	14q32.33
6476331	A_32_P148118	PREDICTED: ig kappa chain V-I region Walker-like (LOC642838), mRNA.		LOC642838	2
6476427	A_23_P360804	copine V (CPNE5), mRNA.	Hs.657869	CPNE5	6p21.1
6476981	A_24_P605563	Cytoskeleton associated protein 2	Hs.640434	CKAP2	13q14
6477118	A_23_P21495	Fc fragment of IgG binding protein (FCGBP), mRNA.	Hs.111732	FCGBP	19q13.1
6477147	A_24_P357847	Immunoglobulin kappa constant	Hs.449609	IGKC	2p12
6477599	A_24_P307375	AY320849 immunoglobulin kappa chain variable region {Homo sapiens;} , complete [THC2368014]
6477765	A_24_P494425	Immunoglobulin kappa variable 1D-13	Hs.390427	IGKV1D-13	2p12
6479087	A_23_P151294	interferon, gamma (IFNG), mRNA.	Hs.856	IFNG	12q14
6479205	A_24_P92683	Immunoglobulin heavy constant gamma 1 (G1m marker)	Hs.510635	IGHG1	14q32.33
6479472	A_23_P48088	CD27 molecule (CD27), mRNA.	Hs.355307	CD27	12p13
6479561	A_32_P65022	CDNA clone MGC:178074 IMAGE:9053057	Hs.718918		2
6479664	A_23_P312920	POU class 2 associating factor 1 (POU2AF1), mRNA.	Hs.654525	POU2AF1	11q23.1
6480171	A_23_P73328	Isolate Middle91 immunoglobulin heavy chain variable region (IGVH)	Hs.595878
6481058	A_23_P44053	Clone 60a04 anti-tetanus toxoid immunoglobulin light chain variable region	Hs.660766		2
6481329	A_24_P702749	PREDICTED: ig heavy chain V-III region VH26-like (LOC100653245), mRNA.		LOC100653245	Unknown
6481859	A_23_P361654	Clone 338o08d anti-tetanus toxoid immunoglobulin light chain variable region	Hs.556743
6482379	A_23_P72387	actin filament associated protein 1 (AFAP1), transcript variant a, mRNA.	Hs.529369	AFAP1	4p16
6482664	A_24_P889462	PREDICTED: ig heavy chain V-III region VH26-like (LOC100653245), mRNA.		LOC100653245	Unknown
6482738	A_24_P538459	Immunoglobulin lambda light chain (IGL@)	Hs.449574		22
6482951	A_24_P490109	Unknown
6483038	A_24_P267814	Immunoglobulin lambda constant 1 (Mcg marker)	Hs.449585	IGLC1	22q11.2
6483249	A_24_P76868	BMS1 homolog, ribosome assembly protein (yeast) pseudogene (LOC96610), non-coding RNA.		LOC96610	22q11.22
6483306	A_24_P306905	similar to Ig kappa chain V-II region RPMI 6410 precursor		LOC651928
6483638	A_24_P472081	Immunoglobulin lambda variable 1-44	Hs.655198	IGLV1-44	22q11.2
6483951	A_23_P117662	histidine decarboxylase (HDC), mRNA.	Hs.1481	HDC	15q21-q22
6484315	A_23_P343963	family with sequence similarity 83, member F (FAM83F), mRNA.	Hs.197680	FAM83F	22q13.1
6484834	A_24_P315854	Clone OM03 immunoglobulin heavy chain variable region (IGH@)	Hs.703938		14
6485098	A_24_P759647	CDNA: FLJ22734 fis, clone HUV00109	Hs.306842		X
6486060	A_23_P75915	Resistance to inhibitors of cholinesterase 3 homolog (C. elegans)	Hs.231850	RIC3	11p15.4
6486587	A_24_P488083	Immunoglobulin kappa locus	Hs.719895	IGK@	2p12
6486691	A_23_P159163	Unknown
6486911	A_24_P813550	Src kinase associated phosphoprotein 2	Hs.610137	SKAP2	7p15.2
6487032	A_24_P395415	Immunoglobulin heavy constant alpha 1	Hs.699841	IGHA1	14q32.33
6487608	A_24_P639701	Homo sapiens clone 105/707 immunoglobulin light chain kappa variable region mRNA, partial cds. [AY062331]
6487716	A_24_P367432	Immunoglobulin heavy variable 1-69	Hs.704366	IGHV1-69	14q32.33
6487740	A_24_P626951	Clone 152e05 anti-tetanus toxoid immunoglobulin light chain variable region	Hs.649954
6488033	A_23_P112957	Unknown
6488541	A_32_P159192	PREDICTED: ig kappa chain V-III region VH-like (LOC100652743), mRNA.		LOC100652743	2
6488814	A_23_P167168	immunoglobulin J polypeptide, linker protein for immunoglobulin alpha and mu polypeptides (IGJ), mRNA.	Hs.643431	IGJ	4q21
6489125	A_24_P144346	PREDICTED: hypothetical protein LOC100132941 (LOC100132941), mRNA.		LOC100132941	16
6489858	A_24_P204727	Immunoglobulin heavy variable 3-48	Hs.703936	IGHV3-48	14q32.33
6489885	A_23_P96191	Clone 531H08 anti-tetanus toxoid immunoglobulin light chain variable region	Hs.592929		2
6490588	A_24_P318990	Immunoglobulin lambda constant 1 (Mcg marker)	Hs.449585	IGLC1	22q11.2
6490624	A_23_P72252	Unknown
6490876	A_24_P15550	Clone 540E04 anti-tetanus toxoid immunoglobulin light chain variable region	Hs.720182
6491145	A_24_P677559	Clone 432J15 anti-tetanus toxoid immunoglobulin light chain variable region	Hs.570231		2
6491339	A_23_P32793	Clone 529i14 anti-tetanus toxoid immunoglobulin heavy chain variable region	Hs.720859
6491748	A_23_P158817	Immunoglobulin heavy constant gamma 1 (G1m marker)	Hs.510635	IGHG1	14q32.33
6492384	A_24_P110242	Immunoglobulin heavy variable 3-48	Hs.703936	IGHV3-48	14q32.33
6493278	A_23_P21800	Immunoglobulin kappa constant	Hs.449609	IGKC	2p12
6493638	A_23_P500271	interferon regulatory factor 5 (IRF5), transcript variant 8, mRNA.	Hs.521181	IRF5	7q32
6493827	A_24_P341126	Unknown
6494334	A_24_P161764	Immunoglobulin heavy constant gamma 1 (G1m marker)	Hs.510635	IGHG1	14q32.33
6494374	A_24_P272146	Clone 338o08d anti-tetanus toxoid immunoglobulin light chain variable region	Hs.556743
6495293	A_24_P185421	paraneoplastic Ma antigen family-like 1 (PNMAL1), transcript variant 1, mRNA.	Hs.8395	PNMAL1	19q13.32
6495476	A_32_P148122	PREDICTED: ig kappa chain V-I region HK101-like (LOC644704), mRNA.		LOC644704	9
6495777	A_23_P218126	Immunoglobulin heavy constant gamma 1 (G1m marker)	Hs.510635	IGHG1	14q32.33
6496257	A_24_P519504	Immunoglobulin lambda constant 1 (Mcg marker)	Hs.449585	IGLC1	22q11.2
6496538	A_24_P213161	NLR family, pyrin domain containing 2 (NLRP2), transcript variant 4, mRNA.	Hs.369279	NLRP2	19q13.42
6496565	A_23_P435390	Unknown
6496612	A_23_P136026	Immunoglobulin heavy constant alpha 1	Hs.699841	IGHA1	14q32.33
6496792	A_24_P203886	Unknown
6497624	A_24_P604784	Clone IP149 immunoglobulin heavy chain variable region	Hs.547404
6497867	A_23_P72330	Unknown
6498517	A_24_P35537	resistance to inhibitors of cholinesterase 3 homolog (C. elegans) (RIC3), transcript variant 2, mRNA.	Hs.231850	RIC3	11p15.4
6498932	A_23_P84791	Unknown
6499698	A_24_P169713	Immunoglobulin lambda constant 1 (Mcg marker)	Hs.449585	IGLC1	22q11.2
6499778	A_24_P169593	Unknown
6501359	A_24_P212024	PREDICTED: ig kappa chain V-I region Walker-like (LOC100130100), mRNA.		LOC100130100	2
6502236	A_23_P170830	Isolate RSV34L immunoglobulin light chain variable region	Hs.559369		22
6503018	A_24_P24371	Immunoglobulin heavy constant gamma 1 (G1m marker)	Hs.510635	IGHG1	14q32.33
6503306	A_24_P50972	golgin A6 family-like 1 (GOLGA6L1), mRNA.	Hs.531569	GOLGA6L1	15q11.2
6503576	A_23_P113056	Unknown
6503613	A_24_P315941	Clone 152b10 anti-tetanus toxoid immunoglobulin heavy chain variable region	Hs.705117
6503981	A_24_P852001	PREDICTED: hypothetical protein LOC100291917 (LOC100291917), mRNA.		LOC100291917	Unknown
6504693	A_32_P112623	PREDICTED: family with sequence similarity 27, member E3 (FAM27E3), mRNA.		FAM27E3	9
6504907	A_23_P21260	Immunoglobulin kappa constant	Hs.449609	IGKC	2p12
6505262	A_24_P100684	Enhancer of polycomb homolog 1 (Drosophila)	Hs.720416	EPC1	10p11
6506338	A_24_P350397	Hydroxy-delta-5-steroid dehydrogenase, 3 beta, pseudogene 4	Hs.681806	HSD3BP4	1p13.1
6506962	A_32_P722809	Immunoglobulin kappa constant	Hs.449609	IGKC	2p12
6507835	A_32_P157927	Clone 531H08 anti-tetanus toxoid immunoglobulin light chain variable region	Hs.592929		2
6508895	A_24_P173566	Immunoglobulin lambda constant 1 (Mcg marker)	Hs.449585	IGLC1	22q11.2
6509454	A_24_P384119	similar to Ig heavy chain V-III region VH26 precursor		LOC652791
6509485	A_24_P15388	Isolate Middle91 immunoglobulin heavy chain variable region (IGVH)	Hs.595878
6509864	A_23_P158868	Isolate Tree92 immunoglobulin heavy chain variable region (IGVH)	Hs.733514
6510855	A_23_P61042	Immunoglobulin heavy constant alpha 1	Hs.699841	IGHA1	14q32.33
6510866	A_24_P750327	Putative V-set and immunoglobulin domain-containing protein 6-like	Hs.631647	LOC642131	15q11.2
6510923	A_24_P484904	Immunoglobulin kappa constant	Hs.449609	IGKC	2p12
6511159	A_32_P51988	PREDICTED: ig heavy chain V-III region VH26-like (LOC100293211), mRNA.		LOC100293211	Unknown
6511393	A_24_P229447	Homo sapiens clone CD-27-VH immunoglobulin heavy chain variable region mRNA, partial cds. [AY944711]
6511922	A_24_P169873	Immunoglobulin heavy constant alpha 1	Hs.699841	IGHA1	14q32.33
6512832	A_23_P147224	Immunoglobulin heavy constant gamma 1 (G1m marker)	Hs.510635	IGHG1	14q32.33
6513441	A_24_P204574	IgG lambda light chain V-J-C region (clone Tgl11)	Hs.561078		22
6514516	A_23_P80759	poliovirus receptor-related 3 (PVRL3), transcript variant 2, mRNA.	Hs.293917	PVRL3	3q13
6515142	A_24_P53595	GNAS complex locus (GNAS), transcript variant 4, mRNA.	Hs.125898	GNAS	20q13.3
6515362	A_23_P21249	Homo sapiens IGH mRNA for immunoglobulin heavy chain VHDJ region, partial cds, clone:H101. [AB063751]
6515648	A_23_P37736	tumor necrosis factor receptor superfamily, member 17 (TNFRSF17), mRNA.	Hs.2556	TNFRSF17	16p13.1
6516450	A_24_P161853	PREDICTED: hypothetical protein LOC100132941 (LOC100132941), mRNA.		LOC100132941	16
6516523	A_23_P350782	Clone 60a04 anti-tetanus toxoid immunoglobulin light chain variable region	Hs.660766		2
6516636	A_23_P124632	Immunoglobulin heavy constant alpha 1	Hs.699841	IGHA1	14q32.33
6517862	A_32_P39440	Immunoglobulin kappa constant	Hs.449609	IGKC	2p12
6586248	A_32_P43664	Immunoglobulin J polypeptide, linker protein for immunoglobulin alpha and mu polypeptides	Hs.643431	IGJ	4q21

## Sheet: Module 6
mAdb ID	Clone	Description	UniGene	Gene	Map
6474798	A_32_P198497	Uncharacterized LOC100190986	Hs.648439	LOC100190986	16p12.2
6475049	A_24_P366859	Usher syndrome 1C binding protein 1 (USHBP1), mRNA.	Hs.512773	USHBP1	19p13
6475257	A_24_P931939	CDNA: FLJ21294 fis, clone COL01981	Hs.677300		1
6476495	A_32_P37775	RB1-inducible coiled-coil 1	Hs.196102	RB1CC1	8q11
6476518	A_24_P927377	Mdm4 p53 binding protein homolog (mouse)	Hs.497492	MDM4	1q32
6476542	A_24_P934374	Ubiquitin-conjugating enzyme E2D 3	Hs.518773	UBE2D3	4q24
6476851	A_32_P208533	Transcribed locus	Hs.668364
6477087	A_32_P104809	Morf4 family associated protein 1	Hs.727355	MRFAP1	4p16.1
6477325	A_32_P146169	RAP1B, member of RAS oncogene family	Hs.369920	RAP1B	12q14
6477355	A_32_P104300	Chromosome 5 open reading frame 22	Hs.519246	C5orf22	5p13.3
6477575	A_32_P125984	Unknown
6478051	A_24_P171141	hypothetical protein LOC114227		LOC114227
6479936	A_32_P197109	Phosphatidylserine synthase 1	Hs.292579	PTDSS1	8q22
6480482	A_32_P879150	Transcribed locus	Hs.658588
6480591	A_32_P220109	Transcribed locus	Hs.7753		7
6480765	A_32_P76865	CAMP-regulated phosphoprotein, 19kDa	Hs.727823	ARPP19	15q21.2
6480769	A_32_P41858	Unknown
6482266	A_32_P225734	BolA homolog 2 (E. coli)	Hs.655267	BOLA2	16p11.2
6482283	A_32_P4324	Suppressor of zeste 12 homolog (Drosophila)	Hs.462732	SUZ12	17q11.2
6482533	A_32_P106669	DnaJ (Hsp40) homolog, subfamily B, member 6	Hs.490745	DNAJB6	7q36.3
6482826	A_32_P162716	Zinc finger, SWIM-type containing 6	Hs.650537	ZSWIM6	5q12.1
6482999	A_32_P128006	Microphthalmia-associated transcription factor	Hs.166017	MITF	3p14.2-p14.1
6483333	A_32_P195137	RAD21 homolog (S. pombe)	Hs.81848	RAD21	8q24
6485108	A_32_P23145	Transcribed locus	Hs.694335		5
6485149	A_32_P201020	O-linked N-acetylglucosamine (GlcNAc) transferase (UDP-N-acetylglucosamine:polypeptide-N-acetylglucosaminyl transferase)	Hs.405410	OGT	Xq13
6486313	A_32_P160186	Eukaryotic translation initiation factor 5	Hs.433702	EIF5	14q32.32
6486840	A_32_P161327	PREDICTED: hypothetical LOC100510011, transcript variant 2 (LOC100510011), miscRNA.		LOC100510011	7
6487454	A_24_P752862	RAB, member of RAS oncogene family-like 3	Hs.444360	RABL3	3q13.33
6487635	A_32_P64688	YTH domain containing 1	Hs.175955	YTHDC1	4q13.2
6488322	A_32_P25972	Zinc finger, CCHC domain containing 7	Hs.654700	ZCCHC7	9p13.2
6488440	A_24_P913405	Unknown
6488588	A_32_P94845	Transcribed locus	Hs.265296		2
6488872	A_32_P62434	Protein phosphatase 1, regulatory subunit 15B	Hs.304376	PPP1R15B	1q32.1
6490797	A_32_P145477	Protein kinase, cAMP-dependent, regulatory, type II, beta	Hs.433068	PRKAR2B	7q22
6491391	A_32_P133821	Transcribed locus	Hs.715688		2
6492114	A_32_P64461	Magnesium transporter 1	Hs.740450	MAGT1	Xq21.1
6492463	A_24_P376159	YEATS domain containing 2	Hs.632575	YEATS2	3q27.1
6492519	A_32_P149416	Thioredoxin reductase 1	Hs.715771	TXNRD1	12q23-q24.1
6493719	A_23_P379020	gonadotropin-releasing hormone (type 2) receptor 2 (GNRHR2), non-coding RNA.		GNRHR2	1q12
6494467	A_24_P932416	transmembrane protein 14E (TMEM14E), mRNA.	Hs.632562	TMEM14E	3q25.1
6495402	A_32_P21375	Nucleoporin 43kDa	Hs.510375	NUP43	6q25.1
6495578	A_32_P137408	Dihydropyrimidinase-like 2	Hs.730599	DPYSL2	8p22-p21
6495794	A_32_P151557	Eukaryotic translation initiation factor 2, subunit 3 gamma, 52kDa	Hs.539684	EIF2S3	Xp22.2-p22.1
6495887	A_32_P35256	Osteopetrosis associated transmembrane protein 1	Hs.226780	OSTM1	6q21
6496441	A_32_P63365	Transcribed locus, strongly similar to NP_057427.3 centromere protein F [Homo sapiens]	Hs.693667
6496962	A_32_P75115	N-acylsphingosine amidohydrolase (acid ceramidase) 1	Hs.527412	ASAH1	8p22
6497260	A_24_P919668	N-ethylmaleimide-sensitive factor attachment protein, gamma	Hs.464622	NAPG	18p11.22
6497339	A_32_P129772	Hippocampus abundant transcript-like 1	Hs.727498	HIATL1	9q22.32
6497547	A_32_P186678	Copine III	Hs.191219	CPNE3	8q21.3
6497900	A_24_P867702	Transcribed locus	Hs.601919
6497945	A_32_P62056	Tryptophan rich basic protein	Hs.198308	WRB	21q22.3
6498089	A_32_P42426	Centrosomal protein 170kDa	Hs.533635	CEP170	1q44
6498171	A_23_P103743	RNA binding motif protein 15	Hs.708172	RBM15	1p13
6499205	A_32_P103474	Family with sequence similarity 60, member A	Hs.505154	FAM60A	12p11
6499659	A_24_P942579	CCR4-NOT transcription complex, subunit 1	Hs.460923	CNOT1	16q21
6501786	A_32_P228206	Synaptotagmin XI	Hs.32984	SYT11	1q21.2
6502845	A_32_P216507	Alkylglycerone phosphate synthase	Hs.516543	AGPS	2q31.2
6503207	A_32_P181443	Transcribed locus	Hs.658408		13
6503378	A_32_P24762	Transcribed locus, strongly similar to NP_006734.1 putative RNA-binding protein 3 [Homo sapiens]	Hs.731421
6503728	A_32_P96838	Casein kinase 1, alpha 1	Hs.529862	CSNK1A1	5q32
6504165	A_32_P186185	YTH domain family, member 2	Hs.532286	YTHDF2	1p35
6504167	A_24_P336718	RAB interacting factor (RABIF), mRNA.	Hs.90875	RABIF	1q32.1
6504769	A_24_P925559	Clone 24894 mRNA sequence	Hs.672791
6504787	A_32_P101286	Family with sequence similarity 199, X-linked	Hs.496535	FAM199X	Xq22.2
6505148	A_24_P782102	Small nucleolar RNA, C/D box 22	Hs.655643	SNORD22	11q13
6507122	A_32_P22245	P21 protein (Cdc42/Rac)-activated kinase 2	Hs.518530	PAK2	3q29
6507547	A_32_P15128	2'-5'-oligoadenylate synthetase 2, 69/71kDa	Hs.414332	OAS2	12q24.2
6507825	A_32_P170814	Eukaryotic translation initiation factor 2, subunit 1 alpha, 35kDa	Hs.151777	EIF2S1	14q23.3
6507879	A_32_P134357	DEAD (Asp-Glu-Ala-Asp) box helicase 17	Hs.740372	DDX17	22q13.1
6508414	A_32_P120454	Unknown
6508721	A_32_P77626	Eukaryotic translation initiation factor 4 gamma, 2	Hs.183684	EIF4G2	11p15
6508981	A_32_P125103	IQ motif containing GTPase activating protein 1	Hs.430551	IQGAP1	15q26.1
6509737	A_32_P123204	Lamin B receptor	Hs.435166	LBR	1q42.1
6510434	A_32_P30014	Rho GTPase activating protein 21	Hs.524195	ARHGAP21	10p12.1|10p12.3
6510637	A_23_P22978	Coatomer protein complex, subunit alpha	Hs.162121	COPA	1q23.2
6510966	A_32_P86517	Solute carrier family 38, member 2	Hs.221847	SLC38A2	12q
6512062	A_32_P193908	Syndecan binding protein (syntenin)	Hs.200804	SDCBP	8q12
6512206	A_32_P450879	Immediate early response 2	Hs.501629	IER2	19p13.2
6512283	A_32_P140049	MAX dimerization protein 1	Hs.468908	MXD1	2p13-p12
6512701	A_23_P22761	short stature homeobox (SHOX), transcript variant 1, mRNA.	Hs.105932	SHOX	Yp11.3
6513026	A_24_P664891	Cytochrome c oxidase subunit VIa polypeptide 1	Hs.369624	COX6A1	12q24.2|12q24.2
6515257	A_32_P44047	CD44 molecule (Indian blood group)	Hs.502328	CD44	11p13
6515436	A_24_P918507	RANBP2-like and GRIP domain containing 1	Hs.728970	RGPD1	2p11.2
6515688	A_32_P119928	Mitochondrial ribosomal protein S35	Hs.731634	MRPS35	12p11
6517170	A_24_P942177	Leucyl/cystinyl aminopeptidase	Hs.656905	LNPEP	5q15
6517502	A_32_P45866	Recombination signal binding protein for immunoglobulin kappa J region	Hs.479396	RBPJ	4p15.2
6517926	A_32_P74243	BF366211 IL2-NT0099-300500-096-H08 NT0099 Homo sapiens cDNA, mRNA sequence [BF366211]

## Sheet: Module 7
mAdb ID	Clone	Description	UniGene	Gene	Map
6475260	A_23_P140277	spectrin repeat containing, nuclear envelope 2 (SYNE2), transcript variant 1, mRNA.	Hs.525392	SYNE2	14q23.2
6476625	A_24_P203000	interleukin 2 receptor, beta (IL2RB), mRNA.	Hs.474787	IL2RB	22q13.1
6479388	A_23_P161076	CD2 molecule (CD2), mRNA.	Hs.523500	CD2	1p13.1
6479988	A_23_P385861	cell division cycle associated 2 (CDCA2), mRNA.	Hs.33366	CDCA2	8p21.2
6480120	A_23_P52017	asp (abnormal spindle) homolog, microcephaly associated (Drosophila) (ASPM), transcript variant 1, mRNA.	Hs.121028	ASPM	1q31
6481673	A_24_P307759	spectrin repeat containing, nuclear envelope 2 (SYNE2), transcript variant 1, mRNA.	Hs.525392	SYNE2	14q23.2
6481817	A_23_P98410	CD3g molecule, gamma (CD3-TCR complex) (CD3G), mRNA.	Hs.2259	CD3G	11q23
6482464	A_23_P100730	src kinase associated phosphoprotein 1 (SKAP1), transcript variant 2, mRNA.	Hs.316931	SKAP1	17q21.32
6483104	A_24_P234196	ribonucleotide reductase M2 (RRM2), transcript variant 2, mRNA.	Hs.226390	RRM2	2p25-p24
6485404	A_23_P354146	IL2-inducible T-cell kinase (ITK), mRNA.	Hs.558348	ITK	5q31-q32
6485523	A_32_P7502	CD96 molecule (CD96), transcript variant 2, mRNA.	Hs.142023	CD96	3q13.13-q13.2
6485560	A_23_P91095	CD28 molecule (CD28), transcript variant 3, mRNA.	Hs.443123	CD28	2q33
6486572	A_23_P44155	CD96 molecule (CD96), transcript variant 2, mRNA.	Hs.142023	CD96	3q13.13-q13.2
6487191	A_24_P595223	myocardial infarction associated transcript (non-protein coding) (MIAT), transcript variant 2, non-coding RNA.		MIAT	22q12.1
6488448	A_23_P133445	Granzyme A (granzyme 1, cytotoxic T-lymphocyte-associated serine esterase 3)	Hs.90708	GZMA	5q11-q12
6488882	A_23_P103361	lymphocyte-specific protein tyrosine kinase (LCK), transcript variant 1, mRNA.	Hs.470627	LCK	1p34.3
6490242	A_23_P258504	YME1-like 1 (S. cerevisiae)	Hs.74647	YME1L1	10p14
6494277	A_24_P45476	chemokine (C motif) ligand 1 (XCL1), mRNA.	Hs.546295	XCL1	1q23
6494886	A_32_P163247	CD8a molecule (CD8A), transcript variant 1, mRNA.	Hs.85258	CD8A	2p12
6495450	A_23_P354151	IL2-inducible T-cell kinase (ITK), mRNA.	Hs.558348	ITK	5q31-q32
6495760	A_23_P340019	NLR family, CARD domain containing 3 (NLRC3), mRNA.	Hs.740560	NLRC3	16p13.3
6496741	A_23_P28334	interleukin 18 receptor accessory protein (IL18RAP), mRNA.	Hs.158315	IL18RAP	2q12
6497627	A_24_P854492	myocardial infarction associated transcript (non-protein coding) (MIAT), transcript variant 3, non-coding RNA.		MIAT	22q12.1
6499276	A_23_P151046	killer cell lectin-like receptor subfamily C, member 1 (KLRC1), transcript variant 4, mRNA.	Hs.512576	KLRC1	12p13
6501143	A_24_P68311	spectrin repeat containing, nuclear envelope 2 (SYNE2), transcript variant 1, mRNA.	Hs.525392	SYNE2	14q23.2
6501556	A_23_P311875	CD6 molecule (CD6), transcript variant 1, mRNA.	Hs.643167	CD6	11q13
6504619	A_23_P43369	signaling threshold regulating transmembrane adaptor 1 (SIT1), mRNA.	Hs.88012	SIT1	9p13-p12
6507093	A_23_P369815	Fas ligand (TNF superfamily, member 6) (FASLG), mRNA.	Hs.2007	FASLG	1q23
6508912	A_32_P232559	uncharacterized LOC439949 (LOC439949), transcript variant 2, non-coding RNA.		LOC439949	10p14
6510745	A_23_P44154	CD96 molecule (CD96), transcript variant 1, mRNA.	Hs.142023	CD96	3q13.13-q13.2
6511178	A_23_P212568	T cell receptor associated transmembrane adaptor 1 (TRAT1), mRNA.	Hs.138701	TRAT1	3q13
6511747	A_23_P156218	granzyme K (granzyme 3; tryptase II) (GZMK), mRNA.	Hs.277937	GZMK	5q11.2
6516298	A_23_P144274	janus kinase and microtubule interacting protein 1 (JAKMIP1), transcript variant 2, mRNA.	Hs.479066	JAKMIP1	4p16.1
6517702	A_23_P26124	RAR-related orphan receptor A (RORA), transcript variant 1, mRNA.	Hs.560343	RORA	15q22.2
6517722	A_32_P7721	RAR-related orphan receptor A (RORA), transcript variant 4, mRNA.	Hs.560343	RORA	15q22.2
6517951	A_24_P261734	solute carrier family 38, member 1 (SLC38A1), transcript variant 1, mRNA.	Hs.533770	SLC38A1	12q13.11

## Sheet: Module 8
mAdb ID	Clone	Description	UniGene	Gene	Map
6475241	A_24_P316381	PREDICTED: hypothetical LOC100653030 (LOC100653030), miscRNA.		LOC100653030	unlocalized
6478015	A_24_P169013	major histocompatibility complex, class II, DR beta 6 (pseudogene) (HLA-DRB6), non-coding RNA.		HLA-DRB6	6p21.3
6478220	A_32_P104746	zinc finger, FYVE domain containing 28 (ZFYVE28), transcript variant 2, mRNA.	Hs.292056	ZFYVE28	4p16.3
6478952	A_23_P374844	galanin prepropeptide (GAL), mRNA.	Hs.278959	GAL	11q13.3
6482802	A_23_P302914	zinc finger, FYVE domain containing 28 (ZFYVE28), transcript variant 3, mRNA.	Hs.292056	ZFYVE28	4p16.3
6488598	A_32_P11764	PREDICTED: hypothetical LOC100506758 (LOC100506758), miscRNA.		LOC100506758	3
6489382	A_24_P76120	Family with sequence similarity 160, member B2	Hs.491223	FAM160B2	8p21.3
6491210	A_32_P128980	CDNA clone IMAGE:5260162	Hs.287168		7
6492137	A_32_P157631	NCK-associated protein 1	Hs.603732	NCKAP1	2q32
6492299	A_24_P412734	protease, serine, 36 (PRSS36), transcript variant 2, mRNA.		PRSS36	16p11.2
6493601	A_23_P78158	rabaptin, RAB GTPase binding effector protein 1 (RABEP1), transcript variant 2, mRNA.	Hs.592121	RABEP1	17p13.2
6499016	A_24_P237328	malonyl CoA:ACP acyltransferase (mitochondrial) (MCAT), nuclear gene encoding mitochondrial protein, transcript variant 2, mRNA.	Hs.349111	MCAT	22q13.31
6500112	A_32_P210106	PREDICTED: hypothetical LOC100653030 (LOC100653030), miscRNA.		LOC100653030	unlocalized
6502506	A_32_P143700	Transcribed locus, weakly similar to NP_848927.2 protein LYRIC [Homo sapiens]	Hs.128352		19
6506063	A_32_P101019	Unknown
6507812	A_24_P31165	glial fibrillary acidic protein (GFAP), transcript variant 1, mRNA.	Hs.514227	GFAP	17q21
6509379	A_23_P47086	keratin associated protein 5-8 (KRTAP5-8), mRNA.	Hs.445245	KRTAP5-8	11q13.4
6510242	A_23_P427616	sterile alpha motif domain containing 10 (SAMD10), mRNA.	Hs.27189	SAMD10	20q13.33
6512450	A_23_P101240	V-set and immunoglobulin domain containing 10 like (VSIG10L), mRNA.	Hs.293236	VSIG10L	19q13.41
6513603	A_32_P334340	MLLT4 antisense RNA 1 (non-protein coding) (MLLT4-AS1), non-coding RNA.		MLLT4-AS1	6q27
6516586	A_32_P129689	Dicer 1, ribonuclease type III	Hs.87889	DICER1	14q32.13
6516843	A_24_P579826	Full length insert cDNA clone ZD50C03	Hs.720599
6586116	A_24_P306945	hypothetical LOC441245		LOC441245
